# Supplementary material for: VacSol: a high throughput in silico pipeline to predict potential therapeutic targets in prokaryotic pathogens using subtractive reverse vaccinology
Source: PubMed Central journal article supplement (PMC5307925; doi:10.1186/s12859-017-1540-0), 2017-02-13
Supplement: 12859_2017_1540_MOESM1_ESM.pdf [file 12859_2017_1540_MOESM1_ESM.pdf]

# Installation Guide

VacSol itself does not require any installation. It is just an executable jar file. But it depends upon other standalone tools. VacSol functionality depends on the installation of various tools that behave as pre-requisite for this pipeline execution. VacSol has tested and analyzed to be fully functional on Ubuntu 12.04.5 64 bit. It is developed in Java which is platform independent. VacSol will work on any operating system, if its pre-requisite tools perform their entire functionality on other operating systems. Current guide is intended for Ubuntu 64 bit desktop environment. User may test it on other environments but should take care of compatibility issues and configurations of all prerequisite tools and environment set.

## 1.1 Pre Requisite Tools/Languages

- PSORTb
- NCBI Blast+
- Perl
- Bioperl
- Pftools
- Hmmtop
- ABCPred
- ProPred-I
- ProPred
- Java

Above mentioned tools have their own installation requirements. It is mandatory to install these tools correctly and successfully.

Before installing any tool, please open terminal using ALT+CNTRL+T and run following commands.

```
sudo apt-get update
```

```
sudo apt-get install gcc build-essential
```

### **1.1.1 PSORTb Installation**

PSortb Installation instructions are available at following mentioned url <http://www.psort.org/downloads/INSTALL.html> which is the primary source of PSORTb installation guide.

We have also mentioned below the installation steps for the ease of user, so that he/she can easily install PSORTb.

#### **1.1.1.1 PSORTb Prerequisites**

PSORTb need several prerequisites that must be installed for a fully functional version.

#### **1.1.2 Perl (5.6.X or higher)**

Install Perl using command or get latest version of Perl from <http://www.cpan.org>

```
sudo apt-get install perl
```

#### **1.1.3 Bioperl (1.2.X or higher)**

Install Bioperl using command or Bioperl can be obtained from <http://www.bioperl.org>

```
sudo apt-get install bioperl
```

#### **1.1.4 Stand Alone NCBI Blast**

Following commands are available for install NCBI Blast or it can be downloaded from NCBI FTP site at <ftp://ftp.ncbi.nih.gov/blast/executables/>

```
sudo apt-get install blast2  
sudo apt-get install ncbi-blast+
```

#### **1.1.5 PFTOOLS**

Download pre compiled pftools executable from <https://goo.gl/3hqQof>.

User is suggested to kindly create a folder named **VacSol** and place/put pftools and other material in that folder. This step is not mandatory but suggested for the organization of installation material.

### 1.1.5.1 Libpsortb

Download libpsortb 1.0 from <https://goo.gl/MGJbcb> or from a primary source <http://www.psort.org/download/libpsortb-1.0.tar.gz>.

Please also extract and place the above.ar.gz in VacSol folder.

Open the folderVacSol/libpsortb-1.0 in terminal and run following commands in terminal one by one.

```
sudo ./configure
```

```
sudo make
```

```
sudo make install
```

```
sudo ldconfig
```

At any step, if system prompts for any input, please press Enter and use default options.

After executing above mentioned commands, user will see that a folder has created **/usr/local/lib64** with libraries libhmmmer, libmodhmm, libsquid and libsvmloc etc

**Note:** Final libraries must be in a path that the dynamic linker from Perl can find.

Add following paths in .bashrc file

```
export $HOME:/usr/bin
export PATH=$PATH:$HOME:/usr/bin
export PSORT_PFTOOLS=<basePath>/VacSol/pftools
export BLASTDIR=/usr/bin
export LD_LIBRARY_PATH=/usr/local/lib64
export PSORT_ROOT=/usr/local/psort/bin
source ./bashrc
```

User should update the path, if he/she places pftool or blast at any other location. Set the above environment variables at the end of .bashrc file.

### 1.1.5.2 bio-tools-psort-all

Download bio-tools-psort-all 3.0.3 from <https://goo.gl/5iVtoB> or from a primary source <http://www.psort.org/download/bio-tools-psort-all.3.0.3.tar.gz>

Please also extract and place this in folder VacSol.

Open file VacSol/bio-tools-psort-all/algorithm-hmm/*hmm-binding.cpp* in any text editor and add a line `#include <string.h>` after the line `#include "hmm.h"` at the top of the file (If this line is missed, user should add this line from avoiding to face the exception during installation).

Open the folder VacSol/bio-tools-psort-all in terminal and run following command in terminal

```
perl Makefile.PL
```

During installation, system will require path of blastall, pftool, libhmm, libmodhmm, libsquid and libsvmloc libraries.

Please set the correct path of each library carefully.

**Note:** If user uses default installations as mentioned above, then blastall will be available at location /usr/bin/. Pftool will be available in folder VacSol/pftools/ and other libraries will be available in folder /usr/local/lib64/

Download hmmtop 2.1 from <https://goo.gl/VeJkdP> or from a primary source <http://www.enzim.hu/hmmtop/html/download.html>

Please also extract and place this in folder VacSol.

Navigate to folder VacSol/hmmtop\_2.1 in terminal.

Run following commands in terminal or open README file and follow the instructions.

```
cc hmmtop.c -lm -o hmmtop
```

After executing above mentioned steps, please add further environment variables in `.bashrc` file before source `./bashrc` line.

```
export PSORT_ROOT=/usr/local/psort/bin  
export PSORT_HMMTOP=<basePath>/VacSol/hmmtop_2.1  
export HMMTOP_ARCH=<basePath>/VacSol/hmmtop_2.1/hmmtop.arch  
export HMMTOP_PSV=<basePath>/VacSol/hmmtop_2.1/hmmtop.psv
```

Navigate back to folder `VacSol/bio-tools-psort-all` in terminal and execute following commands

```
sudo make  
sudo make test (optional, but recommended)  
sudo make install
```

Run command `cp -r psort /usr/local/`, this command will copy a psort folder from `/home/<username>/Pipeline /bio-tools-psort-all/` to `/usr/local/psort`

In terminal open a directory using following command

```
cd /usr/local/psort/conf/analysis/scblast
```

and then run a command

```
sudo ./makedb.sh
```

After installation please verify that in file `/usr/local/psort/bin/psort`, the mentioned path at line `[my$root = '/usr/local/psort']` is correctly set. If you not correctly set then update this path.

Now a standalone PSORTb program is available in `$PSORT_ROOT/bin` and can be used to test.

### 1.1.6 OSDDlinux Installation

Install OSDlinux for the installation of ABCPred, Propred and Propred-I.

OSDlinux installation on an existing machine is available at

<http://osddlinux.osdd.net/installe.php>

There is no need to follow all steps mentioned in installation guide available at

<http://osddlinux.osdd.net/installe.php>

Please follow only following sections of that guide

- Pre installation setup for all type of machines
- Installation on any Unix based machine
- Post installation for all machines

Required steps are mentioned below for the ease of researcher, user can also easily install it after applying the following steps one by one.

1. Make a directory "/gpsr/" (directory for installing osddlinux, mkdir /gpsr )
2. Now you need to download only following files
  - base.tar.gz (basic or minimum infrastructure)
  - data.tar.gz (BLAST data for creating PSSM profile & similarity search)
  - models.tar.gz (SVM models used for prediction & classification)
3. Uncompressed and detar above files in directory "/gpsr" (e.g., tar -zxvf base.tar.gz)
4. Set the environment paths by using command

```
cat /gpsr/gpsr_env.sh >> ~/.bashrc"
```

This step will update environment variable HOME as mentioned below.

```
$HOME:/gpsr
```

Review the environment variables in .bashrc file

5. Copy perl of system in /gpsr/local/bin/perl ;directory by using command

```
cp /usr/bin/perl /gpsr/local/bin/
```

6. Change ownership of files in /gpsr ("chown -R <username> /gpsr/\*")
7. Change group of all files in /gpsr ("chgrp -R <username> /gpsr/\*")
8. Start crontab jobs to excute background jobs ("crontab /gpsr/cronjobs")
9. Restart your computer

### 1.1.6.1 Modifications

Modify some code files so that VacSol require files in its required format.

Download modified files from <https://goo.gl/TNcOUQ> and replace existing files with these files.

Replace /gpsr/standalone/abcpred/abcpred.pl with downloaded abcpred.pl file

Similarly replace /gpsr/standalone/propred1/propred1.pl with downloaded propred1.pl file

and replace /gpsr/standalone/propred/propred.pl with downloaded propred.pl file

Now abcpred, propred and propred1 are installed.

Please test abcpred, propred and propred1 individaully to ensure that these tools are installed and configured correctly.

### 1.1.7 Databases

Download configured database files of DEG, SWISS-Prot, MVIRDB, VFDB etc from <https://goo.gl/6aKKUb>

### 1.1.8 VacSol

Download executable VacSol from <https://goo.gl/zNYROM> and install jre and jdk version 7 or higher.

If there is any jre or jdk version 6, please uninstall it and install version 7 or higher.

### 1.1.9 Configurations

Download Config files from <https://goo.gl/grr11P> and place folder Configs in same directory in which VacSol.jar is placed.

#### 1.1.9.1 Log4j Configurations

Create a Temp directory and place its path in Configs /log4j.properties file as mentioned below

```
log = <temp directory path>/log
```

#### 1.1.9.2 VacSol Configurations

Open config.properties and configure paths of DBs and tools in this configuration file as mentioned below.

```
# HSDB Database Path
HSDB=<baseURL>/VacSol/DBs/HSDB/HSDB
# PSortB Bin Directory Path
PSORTB=/usr/local/psort/bin
# DEG Database path
DEGDB=<baseURL>/VacSol/DBs/DEG
# Virulence Factors Database path
VIRFDB=<baseURL>/VacSol/DBs/VIRF
# HMMTOP directory path
HMMTOP=<baseURL>/VacSol/hmmtop_2.1
# Uniprot Database Path
```



```
ANNOT=<baseURL>/VacSol/DBs/ANNOT/uniprot_sprot
# ABCPred for BCell Epitops Path
ABCPred=/gpsr/standalone/abcpred
# Propred1 for TCell MHC1 Epitops Path
MHC1=/gpsr/standalone/propred1
# Propred1 for TCell MHC2 Epitops Path
MHC2=/gpsr/standalone/propred
# XML Template path for using STANDALON mode
TEMPLATE=<baseURL>/VacSol/vacSol.xml
# DEFAULT Submission Method files directory
DEFAULT=<baseURL>/VacSol/Genomes
# Path of TEMP folder
TEMPFOLDER=<baseURL>/VacSol/Temp
# Path for gpsr internal tools TEMP folder
GPSRTEMP=/gpsr/temp
# Directory in which you want to store results
OUTPUT=<crate directory and give its path here>
# Tell system to clear temp directories at the end of
processing
CLEAR=false
# Tell system that Internet is available to use, on false
value system will not use internet consuming features
INTERNET=true
# Options applicable if internet feature is true
SocketTimeout=30000
# Socket communication time out
ConnectTimeout=30000
# Maximum proteins to process for epitope mapping in one
go. Note: 1 Sequences will take around maximum 3 minutes
if internet consuming feature is true, it's better to keep
this value small not greater than 10 and use multiple
passes to save time
```

MaxSeqEpitopProcessing = 10

**Caution:** Please do no change path variables, VacSol will recognize only the mentioned path variables.

*Table 0.1: Description of Different Pathway Variables.*

| <b>PATH VARIABLE</b> | <b>PURPOSE</b>                                                                                                                                                                  |
|----------------------|---------------------------------------------------------------------------------------------------------------------------------------------------------------------------------|
| HSDB                 | This variable will require path of homo sapiens proteins database which will used by Blaster for homology checking                                                              |
| DEGDB                | This variable will require path of essential genes database which will used by Blaster for essentiality checking                                                                |
| VIRFDB               | This variable will require path of virulent proteins database which will used by Blaster for virulence checking                                                                 |
| PSORTB               | This variable will require path of PSORTb which will used by Localizer to predict localization.                                                                                 |
| HMMTOP               | This variable will require path of hmmtop which will used by Helicer to calculate transmembrane helices                                                                         |
| ANNOT                | This variable will require path of database which will used for annotation. Currently UniProt/SwissProt database is configured.                                                 |
| ABCPRED              | This variable will require path of ABCPred tool which will be used by EpiToPer to calculate B Cell epitopes                                                                     |
| MHC1                 | This variable will require path of Propred1 tool which will be used by EpiToPer to calculate MHC-I T Cell epitopes                                                              |
| MHC2                 | This variable will require path of Propred tool which will be used by EpiToPer to calculate MHC-II T Cell epitopes                                                              |
| TEMPLATE             | This path variable will require the path of XML Template that is used in case of STANDALONE mode. (For further detail of this XML Template please review Appendix B User Guide) |
| DEFAULT              | This variable require the path of the folder where genome or proteome files are already placed which can be used in DEFAULT input mode.                                         |

|                       |                                                                                                                                                                                                                |
|-----------------------|----------------------------------------------------------------------------------------------------------------------------------------------------------------------------------------------------------------|
|                       | (For further detail please review Appendix B User Guide)                                                                                                                                                       |
| TEMPFOLDER            | VacSol create some intermediate files during its processing. This variable require the path of such temporary folder. This folder must be created and its path should be configured at this path variable      |
| GPSRTEMP              | Tools used by EpiTope also require a temporary folder. Path of such temporary folder must be configured at this path variable. Such temporary folder will be with name temp under gpsr directory (/gpsr/temp). |
| OUTPUT                | VacSol generate result in five different formats and placed in an output directory. This directory must be created and its path should be configured at this path variable                                     |
| CLEAR                 | This variable is actually a flag which require true or false value. This indicate VacSol to clear or not temporary directories at the end of processing. Recommended value is true.                            |
| INTERNET              | This variable is also a flag which require true or false value. This indicate VacSol to use internet (if available) for some internet dependent.                                                               |
| SOCKETTIMEOUT         | This variable require socket time-out. Recommended value is 30000                                                                                                                                              |
| CONNECTTIMEOUT        | This variable require connection time-out. Recommended value is 30000                                                                                                                                          |
| MAXSEQEPITOPROCESSING | Prioritized proteins will be used for epitope mapping. This variable will limit the number of proteins processing for EpiTope.                                                                                 |

### 1.1.9.3 Additional Configurations

These additional configurations are require to enable DEFAULT input mechanism of VacSol.

Place the default proteome or genome files in a folder configured under path variable DEFAULT.

For example a folder <basePath>/Genome contains files like

- Acinetobacter.fasta
- Campylobacter.fasta
- Bacillus.fasta

And this folder is configured under path variable

DEFAULT=<basePath>/Genome

Open a configuration file proteomes.config and configure the name of these files like

1=Acinetobacter

2=Campylobacter

3=Bacillus

These names will be displayed in dropdown of default input mode and VacSol will automatically accept the path and name of the file. VacSol will pick that file and process it.



## User Guide

Open Terminal and type command

```
java -jar VacSol.jar [Tool Type] [Debug Level<Optional>] [Number of Cores <Optional>]
```

**Tool Type** is first parameter that is composed of two modes (i) GUI and (ii) STANDALONE. GUI option refers to graphical user interface view, whereas STANDALONE option requires input values in XML template and xml file path should be mentioned in configuration file (config.properties) under TEMPLATE variable. Please consult Installation Guide for detail of these path variables.

**Debug Level** is second parameter and it exhibits values ALL, DEBUG, ERROR, FATAL, INFO, OFF, TRACE or WARN. It is an optional parameter. If user does not select this parameter, then VacSol will use a default value for debugging level as ALL. This parameter informs VacSol to set logging level. Details of logging levels are mentioned in the following table.

*Table 1: Description of VacSol Logging Levels.*

| Level | Description                                                                                               |
|-------|-----------------------------------------------------------------------------------------------------------|
| ALL   | All levels including custom levels.                                                                       |
| DEBUG | Designates fine-grained informational events that are most useful to debug an application.                |
| ERROR | Designates error events that might still allow the application to continue running.                       |
| FATAL | Designates very severe error events that will presumably lead the application to abort.                   |
| INFO  | Designates informational messages that highlight the progress of the application at coarse-grained level. |
| OFF   | The highest possible rank and is intended to turn off logging.                                            |
| TRACE | Designates fine-grained informational events than the DEBUG.                                              |
| WARN  | Designates potentially harmful situations.                                                                |

**Note:** DEBUG and TRACE logging levels are not supported in current VacSol version.

**Number of cores** is third parameter that is required to inform how VacSol can utilize as many cores available in host machine. It is also an optional parameter, and by default VacSol will use all available cores of the host machine.

Example: `java -jar VacSol.jar GUI ALL 3`

## 1.2 GUI Mode

On opening VacSol in GUI mode it will show a following window.

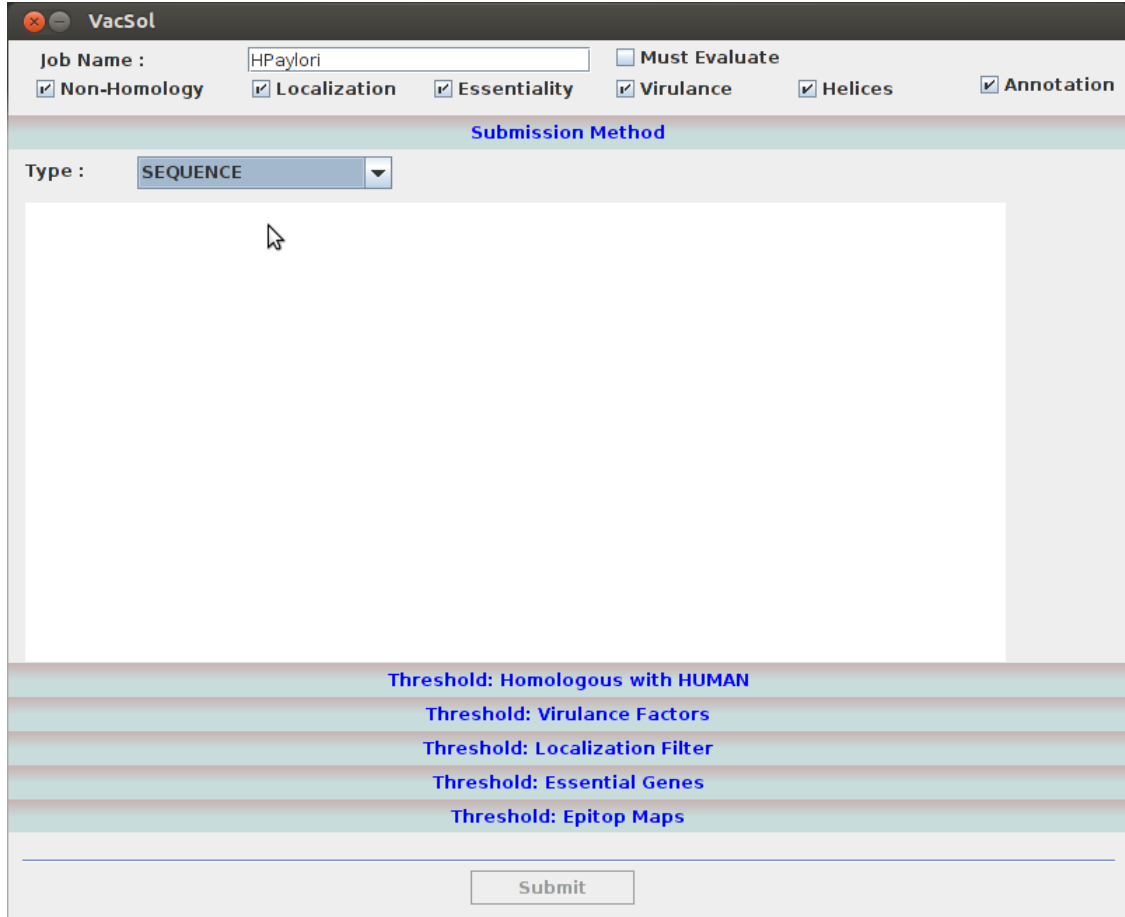

*Figure 1: VacSol GUI Mode.* It depicts the user friendly graphical user interface.

In top section of window VacSol requires some input in the form of checkboxes.

**Non-Homology:** This check box indicates that non-host homology checking is required or not.

**Localization:** This check box indicates that localization prediction is required or not.

**Essentiality:** This check box indicates that essentiality checking is required or not.

**Virulence:** This check box indicates that virulence protein identification is required or not.



**Helices:** This check box indicates transmembrane helices calculation is required or not.

**Annotation:** This check box indicates that the annotation of protein sequence with UniProt data base is required or not.

These check boxes control the behavior of VacSol, and make it feasible to work as a single tool or as a package of tools. To identify prioritize protein, all these checks must be checked.

**Must Evaluate:** This check is very important when user wants to use VacSol to identify prioritize protein(s). VacSol works in a flow as mentioned in Fig 3.1 and Fig. 3.5. If you see in Fig 3.5 there are some decision boxes and Must Evaluate check override these decision boxes. If Must Evaluate check is checked then VacSol will must evaluate all steps weather the previous step qualify the criteria or not.

**Job Name:** A text field which requires name of the job and it will save results in a directory with name provided as Job Name(s).

### **1.2.1 Submission Method**

VacSol pipeline offers four different submission options. Accordion panel bar has title Submission method. This panel contains a drop down list of types through which user can select the required type.

### 1.2.1.1 SEQUENCE

In Sequence option, a small window will open in which user can paste the protein sequence in plain format and submit it.

**VacSol**

Job Name :   Must Evaluate

Non-Homology  Localization  Essentiality  Virulence  Helices  Annotation

**Submission Method**

Type :

```
MLHKKVLLALTASLICQESLFAKEKDYTLGKVSTAGKKDRSDYSGQVNLGYSGITAPKSWQDEEVKKTGSRTVISNKALTQQANQSIEEAL
QNVPLQLIRNATGVGAMPTIQIRGFGAGGSGHSDATLMLVNGIPVYMAPYAHIELDIFPVTFQAI DRIDVKGGGSVQYGPNTYGGVNIITK
PIPNQWENQAERITYWAKARNAGFAAPPDKTGDPSFIKSLGNLLYNTYVRSGGMINKHVGIQAQANWVRGQGFRDNDSPSNISNYWL
DGVYDINENNGIKAYYQYYDFAIAQP GSLSEQDYKINRFANLRPLNQKGGRSQRF GAVYENRFGDLKVG GTFSTYYGQLMTRDFQVSS
SYNSANMVT CFSEAACRAAGLPAGYNLAVPYATNYNGWAEVENPVR SINNAFEPKVNLI VNTGKVKQTFIMGLRFMTTFLQRQYLNTN
ECATKTS GEGAGFLCEGANVMSGWPKPHIKHG VYRNWNWNRNNYTA VYLSDRIEAWDGRFFIVPGLRYAFVQYNNENASNWMQIPEKD
LRKIKHMNNWMPSTNIGFIPVQGDHNVLT YFN YQRSFVPPQLDVL SYGGA EYFTQHFD TVEAGARYTYKDKFSFNADYFR IWARD FATG
QYSVYTS GPMKGNVRPINGYSQGVELELYRPIRGLQFHAAFNYIDTRVT SHGPLTDLNGDVLKGT SYNKHFFVSPFQFILDARYNWRKT
TIGISSYFYSRAYSGISNSAAGGYGMQYYSGGNNYESVLNSGYCEAWCMTQHEGLLPWYWWNIQV SQIFWENGRHRVTGSLQINNI
FNMKYFTGIGSSPAGLQAPGRSVTAYLNYTF
```

**Threshold: Homologous with HUMAN**

**Threshold: Virulence Factors**

**Threshold: Localization Filter**

**Threshold: Essential Genes**

**Threshold: Epitop Maps**

**Figure 2: VacSol Input Acceptance Way in Sequence Form.** If a user selects a sequence way, then a text box appears to paste the sequence in FASTA format.

### 1.2.1.2 FILE

This submission method provides option to user of selecting the desired file and submit it to VacSol pipeline. On selection of file, VacSol displays the count of protein sequences in front of Browse button.

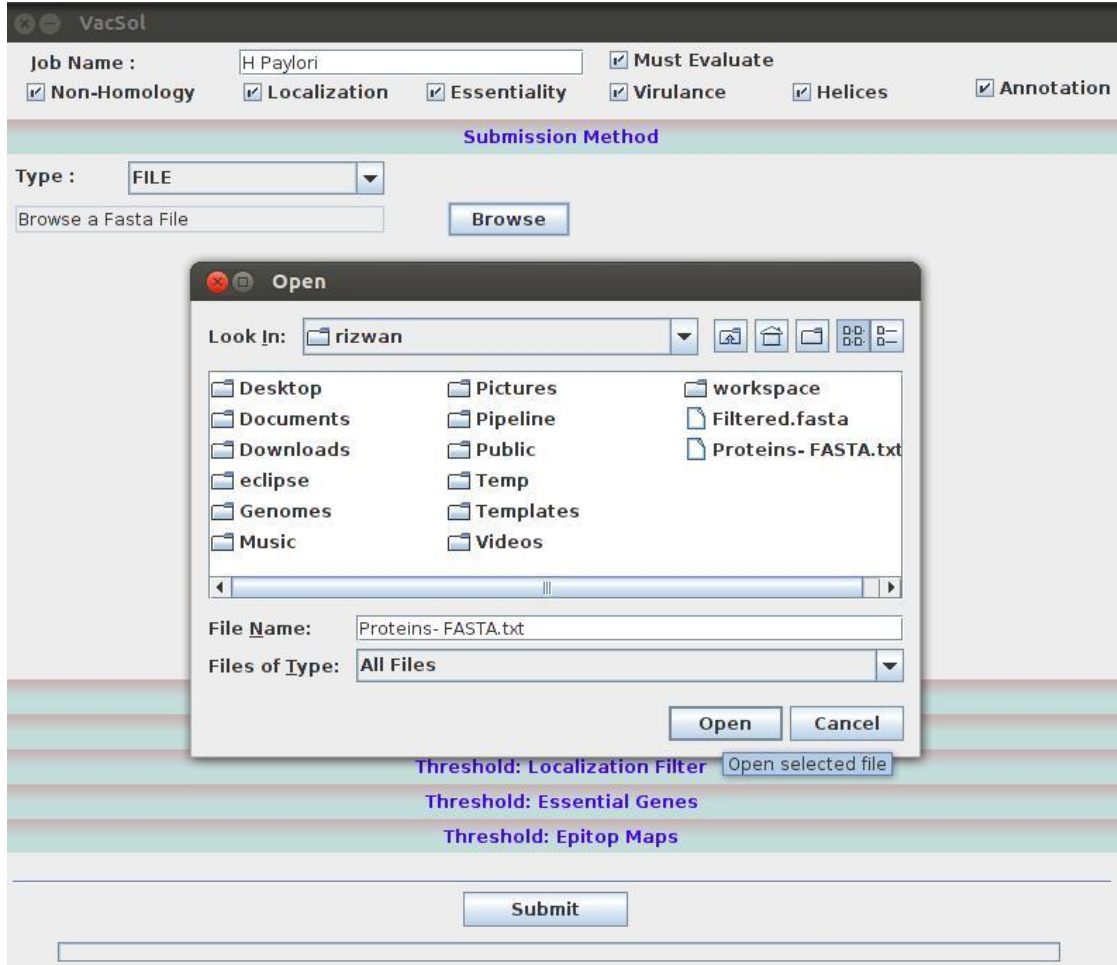

**Figure 3: VacSol Input Acceptance Way in File Form.** A pop up window will open to select proteome sequence file, if user selects a File form.

### 1.2.1.3 DEFAULT

This option display another dropdown to select one of the pre-configured default fasta file.

The screenshot shows the VacSol application window. At the top, there's a 'Job Name' field containing 'H Paylori'. Below it are several checked checkboxes: 'Non-Homology', 'Localization', 'Essentiality', 'Virulence', 'Helices', 'Annotation', and 'Must Evaluate'. The 'Submission Method' section is highlighted in light blue. It contains a 'Type' dropdown menu currently set to 'DEFAULT'. Below this, another dropdown menu is open, showing a list of bacterial species: 'Helicobacter pylori', 'Caulobacter crescentus', 'Bacillus subtilis', 'Acinetobacter', 'Staphylococcus aureus', 'pseudomonas aeruginosa', 'Mycoplasma pulmonis', and 'Helicobacter pylori'. The text 'You choose 115 sequences' is displayed to the right of the dropdown. Below the dropdowns are five threshold options: 'Threshold: Homologous with HUMAN', 'Threshold: Virulence Factors', 'Threshold: Localization Filter', 'Threshold: Essential Genes', and 'Threshold: Epitop Maps'. At the bottom of the form is a 'Submit' button and a progress bar.

*Figure 4: VacSol Input Acceptance Way from Already Available Sequences.* On selecting Default option, a drop down will appear to show the bacterial proteomes that have already present in VacSol.

### 1.2.1.4 ONLINE

This option requires a UniProt protein ID. INTERNET variable must be configured as true and internet should be available at host machine, for using this online option. VacSol will download the protein of provided id and execute it based on provided parameters.

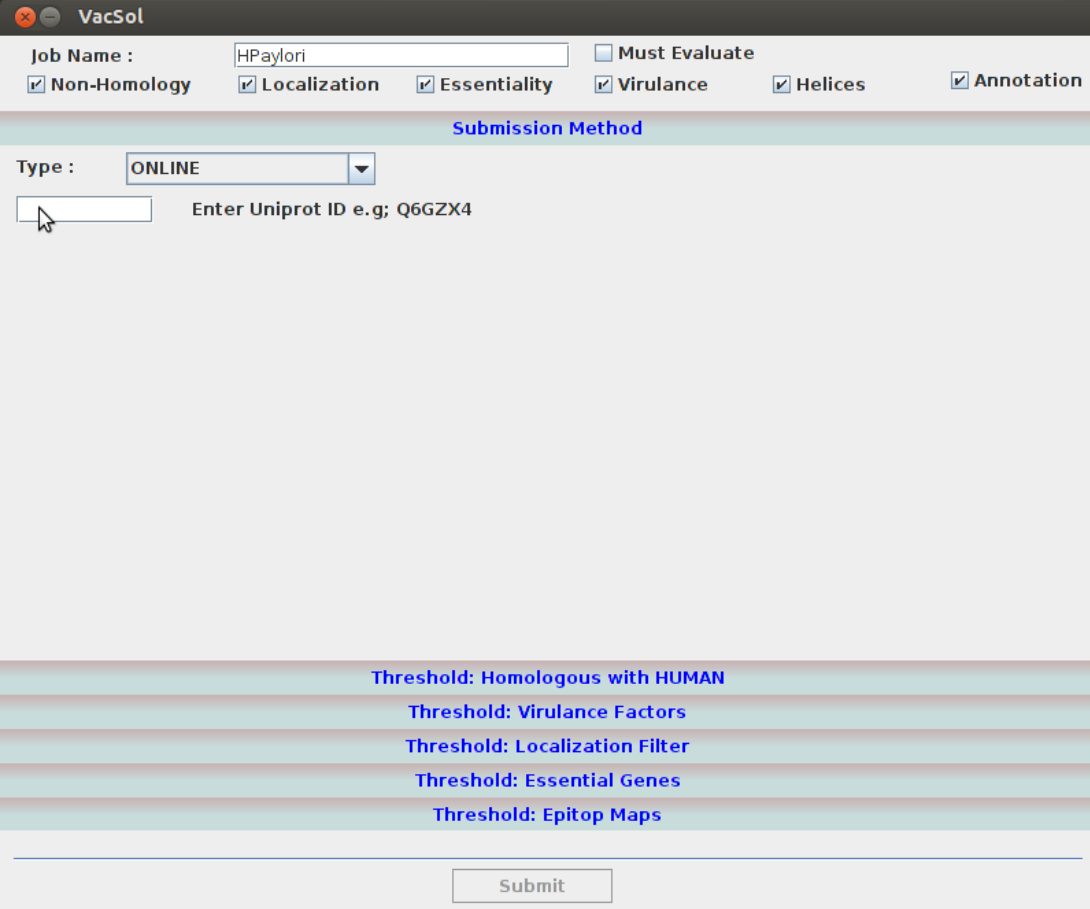

The screenshot shows the VacSol web interface. At the top, the window title is "VacSol". Below the title bar, there are several input fields and checkboxes. The "Job Name" field contains "HPaylori". To its right is a checkbox for "Must Evaluate" which is unchecked. Below the job name are several checked checkboxes: "Non-Homology", "Localization", "Essentiality", "Virulence", "Helices", and "Annotation". A section titled "Submission Method" contains a dropdown menu for "Type" set to "ONLINE". Below this is an input field for "Enter Uniprot ID e.g; Q6GZX4" with a mouse cursor pointing to it. At the bottom of the form, there are five threshold settings: "Threshold: Homologous with HUMAN", "Threshold: Virulence Factors", "Threshold: Localization Filter", "Threshold: Essential Genes", and "Threshold: Epitop Maps". A "Submit" button is located at the bottom center of the form.

**Figure 5: VacSol Input Acceptance through Online Retrieving Sequence.** Online option requires a UniProt protein ID.

### 1.2.2 Threshold: Homologous with Human

This panel requires the threshold values of evaluation criteria. VacSol evaluates homologous proteins with human based on provided criteria and discards them from results and identify non-homologous proteins.

The screenshot shows the VacSol web interface. At the top, the window title is 'VacSol'. Below it, there is a 'Job Name' field containing 'H Paylori'. To the right of the job name are several checkboxes, all of which are checked: 'Must Evaluate', 'Non-Homology', 'Localization', 'Essentiality', 'Virulence', 'Helices', and 'Annotation'. Below these checkboxes is a section titled 'Submission Method' in blue text. Underneath that is the section 'Threshold: Homologous with HUMAN' in blue text. This section contains three dropdown menus: 'Bit Scores' set to '100', 'E Value' set to '1.0E-5', and 'Percentage Identity' set to '35.0'. Below these are four more sections, each with a blue title: 'Threshold: Virulence Factors', 'Threshold: Localization Filter', 'Threshold: Essential Genes', and 'Threshold: Epitop Maps'. At the bottom of the interface is a 'Submit' button and a long empty text input field.

**Figure 6: Threshold Representation for Homology Detection.** This figure clearly displays the threshold values that have set for determining homology among given bacterial sequences and the human sequences.

### 1.2.3 Threshold: Virulence Factors

This panel requires the threshold values of virulence factor identification criteria. VacSol evaluates virulence proteins based on given threshold criteria.

The screenshot shows the VacSol web interface. At the top, the window title is "VacSol". Below it, there is a "Job Name" field containing "H Paylori". To the right of the job name are several checkboxes: "Must Evaluate" (checked), "Non-Homology" (checked), "Localization" (checked), "Essentiality" (checked), "Virulence" (checked), "Helices" (checked), and "Annotation" (checked). Below these are several horizontal bars representing different threshold categories: "Submission Method", "Threshold: Homologous with HUMAN", "Threshold: Virulence Factors", "Threshold: Localization Filter", "Threshold: Essential Genes", and "Threshold: Epitop Maps". Under the "Threshold: Virulence Factors" section, there are four dropdown menus: "Bit Scores" (set to 100), "E Value" (set to 1.0E-5), "Percentage Identity" (set to 35.0), and "Data Base". The "Data Base" dropdown menu is open, showing options: "ALL", "MVirDB", and "VFDB". A mouse cursor is pointing at "MVirDB". At the bottom of the interface, there is a "Submit" button and a long empty input field.

*Figure 7: Threshold Representation for Determining Virulence Factors.* It displays the threshold values for determining virulence factor by selecting MvirDB, VFDB, or both databases.

### 1.2.4 Threshold: Localization Filter

This panel requires threshold values for localization identification. VacSol evaluates and identifies proteins which have localizations mentioned in threshold criteria.

The screenshot shows the VacSol web interface. At the top, the window title is 'VacSol'. Below it, the 'Job Name' field contains 'HPaylori'. To the right of the job name is a 'Must Evaluate' checkbox, which is unchecked. Below the job name are several checkboxes: 'Non-Homology' (checked), 'Localization' (checked), 'Essentiality' (checked), 'Virulance' (checked), 'Helices' (checked), and 'Annotation' (checked). The interface is divided into sections by horizontal lines. The sections are: 'Submission Method', 'Threshold: Homologous with HUMAN', 'Threshold: Virulance Factors', 'Threshold: Localization Filter', 'Threshold: Essential Genes', and 'Threshold: Epitop Maps'. The 'Threshold: Localization Filter' section contains the following fields: 'Organism Type' (Bacteria), 'Gram Stain' (Negative), and 'Localizations' (a dropdown menu). The 'Localizations' dropdown menu is open, showing the following options: 'Cytoplasmic', 'CytoplasmicMembrane', 'Cellwall', 'Extracellular', 'Periplasmic', 'Unknown', and 'OuterMembrane'. At the bottom of the interface is a 'Submit' button.

**Figure 8: Representation of Threshold Set for Cytoplasmic & Extracellular Localization Filtering.** This diagram describes that VacSol is very helpful in determining the protein subcellular locations. It also offers users to select any one of the mentioned locations to determine the protein residential position in cell that would be helpful in determining its function.



### 1.2.5 Threshold: Essential Genes

This panel requires the threshold values of essential proteins identification criteria. VacSol evaluates essential proteins based on provided threshold criteria.

The screenshot shows the VacSol application window. At the top, the 'Job Name' is 'H Paylori'. Below it, several checkboxes are checked: 'Non-Homology', 'Localization', 'Essentiality', 'Virulence', 'Helices', and 'Annotation'. The 'Must Evaluate' checkbox is also checked. The 'Submission Method' section is highlighted in blue and contains the text 'Threshold: Homologous with HUMAN', 'Threshold: Virulence Factors', 'Threshold: Localization Filter', and 'Threshold: Essential Genes'. The 'Threshold: Essential Genes' section has three input fields: 'Bit Scores' set to 100, 'E Value' set to 1.0E-5, and 'Percentage Identity' set to 35.0. The 'Organism' dropdown menu is open, showing a list of bacterial species including ALL, Bacillus subtilis 168, Staphylococcus aureus N315, Vibrio cholerae N16961, Haemophilus influenzae Rd KW20, Mycoplasma genitalium G37, Streptococcus pneumoniae, Helicobacter pylori 26695, Mycobacterium tuberculosis H37Rv, Salmonella typhimurium LT2, Francisella novicida U112, Acinetobacter baylyi ADP1, Mycoplasma pulmonis UAB CTIP, and Pseudomonas aeruginosa UICBPP\_PA14. A 'Submit' button is located at the bottom of the interface.

**Figure 9: Representation of Threshold Set for Identifying Essential Genes.** It also describes threshold values that have been set for essential genes determination. Users can select any bacterial proteome to determine the presence of essential genes in their provided proteome.

### 1.2.6 Threshold: Epitope Maps

This panel requires the threshold values for epitope maps.

**B-Cell Threshold:** BCell highest scoring peptides, threshold is a pre-defined numerical value used to make decision.

**Windows Length:** Number of peptide mers to select. For example 20 mers

**T-Cell Threshold:** %age of highest scoring peptides.

**Top Peptides:** Number of top peptides to select.

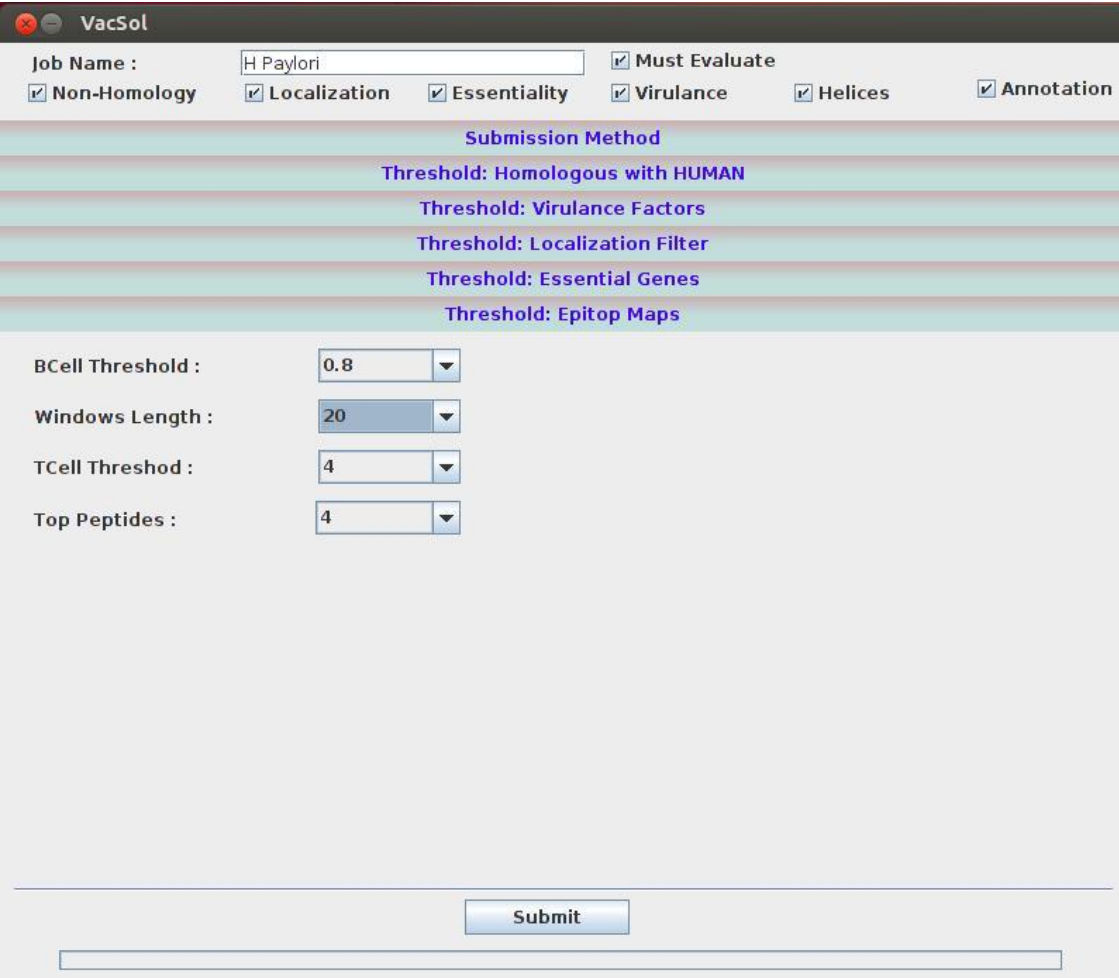

The screenshot shows the VacSol application window. At the top, the 'Job Name' is 'H Paylori'. Below it, several checkboxes are checked: 'Non-Homology', 'Localization', 'Essentiality', 'Virulence', 'Helices', and 'Annotation'. The 'Must Evaluate' checkbox is also checked. A section titled 'Submission Method' contains five threshold settings: 'Threshold: Homologous with HUMAN', 'Threshold: Virulence Factors', 'Threshold: Localization Filter', 'Threshold: Essential Genes', and 'Threshold: Epitop Maps'. Below this, four dropdown menus are visible: 'BCell Threshold' (0.8), 'Windows Length' (20), 'TCell Threshold' (4), and 'Top Peptides' (4). A 'Submit' button is located at the bottom center of the window.

*Figure 10: Representation of Threshold Set for Epitope Maps.* It displays the threshold values for epitope mapping.

### 1.3 STANDALONE Mode

Standalone mode is an alternative of GUI mode. In this mode user can provide input values in the form of an XML template. All fields are same and equivalent to GUI mode, but the difference is that in GUI mode user selects values from graphical user interface. While in STANDALONE mode, user will fill values in XML template and set the path of XML template under path variable TEMPLATE .

```

<VacSol>
  <JobName>MyTestJob</JobName>
  <MustEvaluate>true</MustEvaluate>
  <isPerformNonHomology>true</isPerformNonHomology>
  <isPerformEssentiality>true</isPerformEssentiality>
  <isPerformVirulance>true</isPerformVirulance>
  <isPerformEpitopMapping>true</isPerformEpitopMapping>
  <isPerformTransmembraneHelices>true</isPerformTransmembraneHelices>
  <SubmissionMethod>
    <Type>SEQUENCE</Type>
    <FilePath>/home/rizwan/File.fasta</FilePath>
    <Sequence>ABCDEFGHGIJK</Sequence>
  </SubmissionMethod>
  <Thresholds>
    <Homology>
      <Threshold>
        <BitScore>100</BitScore>
        <eValue>1.0E-5</eValue>
        <PercentageIdentity>35.0</PercentageIdentity>
      </Threshold>
    </Homology>
    <VirulanceFactors>
      <DataBaseType>ALL</DataBaseType>
      <Threshold>
        <BitScore>100</BitScore>
        <eValue>1.0E-5</eValue>
        <PercentageIdentity>35.0</PercentageIdentity>
      </Threshold>
    </VirulanceFactors>
    <Localizations>
      <Localization>Extracellular</Localization>
      <Localization>CytoplasmicMembrane</Localization>
      <OrganismType>Bacteria</OrganismType>
      <GramStain>n</GramStain>
    </Localizations>
    <Essentiality>
      <Organism>DEG</Organism>
      <Organism>DEG1001</Organism>
      <Organism>DEG1013</Organism>
      <Threshold>
        <BitScore>100</BitScore>
        <eValue>1.0E-5</eValue>
        <PercentageIdentity>35.0</PercentageIdentity>
      </Threshold>
    </Essentiality>
    <EpitopMap>
      <BCELL>
        <Thresold>0.5</Thresold>
        <WindowLength>20</WindowLength>
      </BCELL>
      <AntigenThreshold>0.5</AntigenThreshold>
      <TCELL>
        <Thresold>5</Thresold>
        <TopPeptides>5</TopPeptides>
      </TCELL>
    </EpitopMap>
  </Thresholds>
</VacSol>

```

**Figure 10: Input Template for Standalone Mode.** This figure describes the XML input template for using VacSole as a standalone mode.
