# Supplementary material for: VacSol: a high throughput in silico pipeline to predict potential therapeutic targets in prokaryotic pathogens using subtractive reverse vaccinology
Source: PubMed Central journal article supplement (PMC5307925; doi:10.1186/s12859-017-1540-0), 2017-02-13
Supplement: 12859_2017_1540_MOESM2_ESM.pdf [file 12859_2017_1540_MOESM2_ESM.pdf]

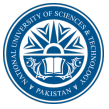

## Summary Report

| Seq. Id | Non-Homologous | Localization        | Essential | Virulent | Helices < 2 | Annotated |
|---------|----------------|---------------------|-----------|----------|-------------|-----------|
| 1       |                |                     |           |          |             |           |
|         | 0              | Cytoplasmic         | 16        | 0        | OUT: 0      |           |
| 2       |                |                     |           |          |             |           |
|         | 1              | Cytoplasmic         | 0         | 0        | OUT: 0      |           |
| 3       |                |                     |           |          |             |           |
|         | 0              | OuterMembrane       | 1         | 3        | OUT: 0      |           |
| 4       |                |                     |           |          |             |           |
|         | 0              | OuterMembrane       | 0         | 15       | OUT: 0      |           |
| 5       |                |                     |           |          |             |           |
|         | 0              | CytoplasmicMembrane | 1         | 0        | IN: 8       |           |
| 6       |                |                     |           |          |             |           |
|         | 0              | CytoplasmicMembrane | 0         | 0        | IN: 2       |           |
| 7       |                |                     |           |          |             |           |
|         | 2              | CytoplasmicMembrane | 3         | 1        | IN: 6       |           |
| 8       |                |                     |           |          |             |           |

|    |   |               |    |    |        |  |
|----|---|---------------|----|----|--------|--|
|    | 0 | Cytoplasmic   | 0  | 11 | OUT: 0 |  |
| 9  |   |               |    |    |        |  |
|    | 0 | Cytoplasmic   | 1  | 6  | OUT: 0 |  |
| 10 |   |               |    |    |        |  |
|    | 0 | OuterMembrane | 0  | 48 | IN: 1  |  |
| 11 |   |               |    |    |        |  |
|    | 0 | Unknown       | 0  | 4  | OUT: 0 |  |
| 12 |   |               |    |    |        |  |
|    | 4 | Cytoplasmic   | 3  | 0  | OUT: 0 |  |
| 13 |   |               |    |    |        |  |
|    | 0 | Unknown       | 0  | 0  | OUT: 0 |  |
| 14 |   |               |    |    |        |  |
|    | 0 | Cytoplasmic   | 0  | 0  | OUT: 0 |  |
| 15 |   |               |    |    |        |  |
|    | 0 | Cytoplasmic   | 23 | 0  | OUT: 0 |  |
| 17 |   |               |    |    |        |  |
|    | 0 | Cytoplasmic   | 0  | 0  | OUT: 0 |  |
| 16 |   |               |    |    |        |  |
|    | 0 | Cytoplasmic   | 0  | 0  | OUT: 0 |  |
| 19 |   |               |    |    |        |  |
|    |   |               |    |    |        |  |

|    |    |                     |   |   |         |  |
|----|----|---------------------|---|---|---------|--|
|    | 0  | Cytoplasmic         | 1 | 0 | IN: 0   |  |
| 18 |    |                     |   |   |         |  |
|    | 0  | Cytoplasmic         | 0 | 3 | IN: 1   |  |
| 21 |    |                     |   |   |         |  |
|    | 0  | Unknown             | 0 | 0 | IN: 1   |  |
| 20 |    |                     |   |   |         |  |
|    | 0  | Cytoplasmic         | 0 | 0 | IN: 3   |  |
| 23 |    |                     |   |   |         |  |
|    | 0  | CytoplasmicMembrane | 0 | 0 | OUT: 1  |  |
| 22 |    |                     |   |   |         |  |
|    | 0  | CytoplasmicMembrane | 0 | 3 | OUT: 13 |  |
| 25 |    |                     |   |   |         |  |
|    | 10 | Cytoplasmic         | 4 | 0 | OUT: 0  |  |
| 24 |    |                     |   |   |         |  |
|    | 0  | Unknown             | 1 | 0 | OUT: 0  |  |
| 27 |    |                     |   |   |         |  |
|    | 0  | Cytoplasmic         | 0 | 0 | OUT: 2  |  |
| 26 |    |                     |   |   |         |  |
|    | 0  | Unknown             | 4 | 0 | OUT: 0  |  |

|    |   |                         |   |   |        |  |
|----|---|-------------------------|---|---|--------|--|
| 29 |   |                         |   |   |        |  |
|    | 0 | Unknown                 | 0 | 0 | OUT: 0 |  |
| 28 |   |                         |   |   |        |  |
|    | 0 | Unknown                 | 0 | 0 | IN: 1  |  |
| 31 |   |                         |   |   |        |  |
|    | 0 | Cytoplasmic             | 0 | 0 | IN: 1  |  |
| 30 |   |                         |   |   |        |  |
|    | 0 | Unknown                 | 1 | 0 | IN: 1  |  |
| 34 |   |                         |   |   |        |  |
|    | 0 | Unknown                 | 0 | 0 | IN: 0  |  |
| 35 |   |                         |   |   |        |  |
|    | 0 | Unknown                 | 1 | 0 | OUT: 2 |  |
| 32 |   |                         |   |   |        |  |
|    | 0 | Unknown                 | 1 | 0 | OUT: 0 |  |
| 33 |   |                         |   |   |        |  |
|    | 0 | Cytoplasmic             | 0 | 0 | IN: 1  |  |
| 38 |   |                         |   |   |        |  |
|    | 9 | Periplasmic             | 1 | 0 | OUT: 2 |  |
| 39 |   |                         |   |   |        |  |
|    | 0 | CytoplasmicMem<br>brane | 0 | 0 | IN: 4  |  |

|    |   |                     |   |   |         |  |
|----|---|---------------------|---|---|---------|--|
| 36 |   |                     |   |   |         |  |
|    | 0 | Unknown             | 1 | 0 | OUT: 0  |  |
| 37 |   |                     |   |   |         |  |
|    | 0 | CytoplasmicMembrane | 1 | 0 | OUT: 5  |  |
| 42 |   |                     |   |   |         |  |
|    | 0 | Unknown             | 0 | 0 | OUT: 0  |  |
| 43 |   |                     |   |   |         |  |
|    | 0 | Unknown             | 1 | 0 | IN: 1   |  |
| 40 |   |                     |   |   |         |  |
|    | 0 | Unknown             | 0 | 0 | OUT: 1  |  |
| 41 |   |                     |   |   |         |  |
|    | 0 | Cytoplasmic         | 0 | 0 | OUT: 0  |  |
| 46 |   |                     |   |   |         |  |
|    | 0 | Cytoplasmic         | 0 | 3 | IN: 1   |  |
| 47 |   |                     |   |   |         |  |
|    | 0 | Unknown             | 0 | 0 | OUT: 1  |  |
| 44 |   |                     |   |   |         |  |
|    | 0 | OuterMembrane       | 0 | 4 | OUT: 0  |  |
| 45 |   |                     |   |   |         |  |
|    | 0 | CytoplasmicMem      | 1 | 0 | OUT: 15 |  |

|    |   | brane               |    |   |         |  |
|----|---|---------------------|----|---|---------|--|
| 51 |   |                     |    |   |         |  |
|    | 0 | Cytoplasmic         | 17 | 0 | IN: 0   |  |
| 50 |   |                     |    |   |         |  |
|    | 0 | Cytoplasmic         | 0  | 0 | OUT: 2  |  |
| 49 |   |                     |    |   |         |  |
|    | 0 | CytoplasmicMembrane | 0  | 0 | IN: 1   |  |
| 48 |   |                     |    |   |         |  |
|    | 0 | Unknown             | 1  | 0 | OUT: 0  |  |
| 55 |   |                     |    |   |         |  |
|    | 0 | Unknown             | 0  | 0 | IN: 3   |  |
| 54 |   |                     |    |   |         |  |
|    | 0 | CytoplasmicMembrane | 1  | 1 | OUT: 13 |  |
| 53 |   |                     |    |   |         |  |
|    | 0 | OuterMembrane       | 0  | 0 | OUT: 0  |  |
| 52 |   |                     |    |   |         |  |
|    | 0 | Cytoplasmic         | 0  | 3 | OUT: 2  |  |
| 59 |   |                     |    |   |         |  |
|    | 0 | Cytoplasmic         | 0  | 0 | OUT: 0  |  |

|    |    |             |   |   |        |  |
|----|----|-------------|---|---|--------|--|
| 58 |    |             |   |   |        |  |
|    | 0  | Unknown     | 1 | 0 | OUT: 0 |  |
| 57 |    |             |   |   |        |  |
|    | 0  | Cytoplasmic | 3 | 0 | OUT: 1 |  |
| 56 |    |             |   |   |        |  |
|    | 0  | Cytoplasmic | 0 | 0 | OUT: 0 |  |
| 63 |    |             |   |   |        |  |
|    | 0  | Cytoplasmic | 1 | 0 | OUT: 0 |  |
| 62 |    |             |   |   |        |  |
|    | 0  | Cytoplasmic | 1 | 0 | IN: 1  |  |
| 61 |    |             |   |   |        |  |
|    | 4  | Periplasmic | 1 | 4 | OUT: 0 |  |
| 60 |    |             |   |   |        |  |
|    | 16 | Cytoplasmic | 3 | 0 | OUT: 0 |  |
| 68 |    |             |   |   |        |  |
|    | 0  | Cytoplasmic | 0 | 0 | OUT: 0 |  |
| 69 |    |             |   |   |        |  |
|    | 0  | Cytoplasmic | 0 | 0 | OUT: 0 |  |
| 70 |    |             |   |   |        |  |
|    | 0  | Cytoplasmic | 0 | 0 | OUT: 0 |  |

|    |   |                     |   |   |        |   |
|----|---|---------------------|---|---|--------|---|
| 71 |   |                     |   |   |        |   |
|    | 0 | Cytoplasmic         | 0 | 3 | OUT: 1 |   |
| 64 |   |                     |   |   |        |   |
|    | 0 | Cytoplasmic         | 1 | 0 | OUT: 0 |   |
| 65 |   |                     |   |   |        |   |
|    | 0 | CytoplasmicMembrane | 5 | 0 | OUT: 4 |   |
| 66 |   |                     |   |   |        |   |
|    | 0 | Cytoplasmic         | 2 | 0 | IN: 0  |   |
| 67 |   |                     |   |   |        |   |
|    | 0 | Cytoplasmic         | 0 | 0 | IN: 1  |   |
| 76 |   |                     |   |   |        |   |
|    | 0 | Unknown             | 1 | 0 | OUT: 0 |   |
| 77 |   |                     |   |   |        |   |
|    | 0 | CytoplasmicMembrane | 0 | 0 | OUT: 1 |   |
| 78 |   |                     |   |   |        |   |
|    | 0 | Unknown             | 0 | 0 | OUT: 0 |   |
| 79 |   |                     |   |   |        |   |
|    | 0 | CytoplasmicMembrane | 0 | 0 | IN: 1  |   |
|    | . | .                   | . | . | .      | . |



|    |   |                     |   |    |         |  |
|----|---|---------------------|---|----|---------|--|
| 72 | 0 | Cytoplasmic         | 3 | 3  | OUT: 0  |  |
| 73 |   |                     |   |    |         |  |
|    | 0 | Cytoplasmic         | 0 | 0  | OUT: 0  |  |
| 74 |   |                     |   |    |         |  |
|    | 0 | Extracellular       | 0 | 15 | OUT: 2  |  |
| 75 |   |                     |   |    |         |  |
|    | 0 | Extracellular       | 0 | 7  | OUT: 0  |  |
| 85 |   |                     |   |    |         |  |
|    | 0 | OuterMembrane       | 0 | 4  | IN: 1   |  |
| 84 |   |                     |   |    |         |  |
|    | 0 | Cytoplasmic         | 1 | 2  | OUT: 0  |  |
| 87 |   |                     |   |    |         |  |
|    | 0 | Cytoplasmic         | 0 | 0  | OUT: 0  |  |
| 86 |   |                     |   |    |         |  |
|    | 0 | Extracellular       | 0 | 0  | OUT: 0  |  |
| 81 |   |                     |   |    |         |  |
|    | 0 | CytoplasmicMembrane | 0 | 3  | OUT: 11 |  |
| 80 |   |                     |   |    |         |  |
|    | 0 | Unknown             | 0 | 0  | OUT: 0  |  |
| 83 |   |                     |   |    |         |  |

|     |   |             |   |   |        |  |
|-----|---|-------------|---|---|--------|--|
|     | 0 | Cytoplasmic | 0 | 0 | OUT: 0 |  |
| 82  |   |             |   |   |        |  |
|     | 0 | Cytoplasmic | 0 | 0 | OUT: 1 |  |
| 93  |   |             |   |   |        |  |
|     | 0 | Cytoplasmic | 0 | 3 | OUT: 0 |  |
| 92  |   |             |   |   |        |  |
|     | 0 | Periplasmic | 0 | 0 | IN: 1  |  |
| 95  |   |             |   |   |        |  |
|     | 0 | Unknown     | 0 | 0 | OUT: 0 |  |
| 94  |   |             |   |   |        |  |
|     | 0 | Unknown     | 0 | 1 | IN: 1  |  |
| 89  |   |             |   |   |        |  |
|     | 0 | Unknown     | 1 | 0 | OUT: 4 |  |
| 88  |   |             |   |   |        |  |
|     | 0 | Cytoplasmic | 0 | 0 | OUT: 0 |  |
| 91  |   |             |   |   |        |  |
|     | 0 | Cytoplasmic | 0 | 4 | IN: 0  |  |
| 90  |   |             |   |   |        |  |
|     | 0 | Cytoplasmic | 1 | 0 | IN: 0  |  |
| 102 |   |             |   |   |        |  |
|     |   |             |   |   |        |  |

|     |   |             |    |   |        |  |
|-----|---|-------------|----|---|--------|--|
|     | 0 | Cytoplasmic | 2  | 0 | IN: 1  |  |
| 103 |   |             |    |   |        |  |
|     | 0 | Unknown     | 0  | 0 | IN: 1  |  |
| 100 |   |             |    |   |        |  |
|     | 0 | Unknown     | 0  | 8 | IN: 1  |  |
| 101 |   |             |    |   |        |  |
|     | 0 | Cytoplasmic | 6  | 0 | OUT: 0 |  |
| 98  |   |             |    |   |        |  |
|     | 0 | Cytoplasmic | 0  | 0 | OUT: 0 |  |
| 99  |   |             |    |   |        |  |
|     | 1 | Cytoplasmic | 29 | 3 | OUT: 0 |  |
| 96  |   |             |    |   |        |  |
|     | 0 | Cytoplasmic | 0  | 0 | OUT: 0 |  |
| 97  |   |             |    |   |        |  |
|     | 0 | Cytoplasmic | 11 | 0 | OUT: 0 |  |
| 110 |   |             |    |   |        |  |
|     | 0 | Unknown     | 0  | 0 | OUT: 2 |  |
| 111 |   |             |    |   |        |  |
|     | 0 | Unknown     | 0  | 0 | OUT: 2 |  |
| 108 |   |             |    |   |        |  |
|     |   |             |    |   |        |  |

|     |                                                                                     |                                                                                     |                                                                                       |                                                                                       |                                                                                       |                                                                                       |
|-----|-------------------------------------------------------------------------------------|-------------------------------------------------------------------------------------|---------------------------------------------------------------------------------------|---------------------------------------------------------------------------------------|---------------------------------------------------------------------------------------|---------------------------------------------------------------------------------------|
|     | 0                                                                                   | Unknown                                                                             | 0                                                                                     | 0                                                                                     | OUT: 0                                                                                |                                                                                       |
| 109 |    |    |    |    |    |    |
|     | 6                                                                                   | Cytoplasmic                                                                         | 16                                                                                    | 0                                                                                     | OUT: 2                                                                                |                                                                                       |
| 106 |    |    |    |    |    |    |
|     | 0                                                                                   | Unknown                                                                             | 1                                                                                     | 0                                                                                     | IN: 5                                                                                 |                                                                                       |
| 107 |    |    |    |    |    |    |
|     | 3                                                                                   | Cytoplasmic                                                                         | 2                                                                                     | 3                                                                                     | OUT: 0                                                                                |                                                                                       |
| 104 |    |    |    |    |    |    |
|     | 0                                                                                   | Cytoplasmic                                                                         | 0                                                                                     | 0                                                                                     | OUT: 2                                                                                |                                                                                       |
| 105 |    |    |    |    |    |    |
|     | 0                                                                                   | Cytoplasmic                                                                         | 8                                                                                     | 0                                                                                     | OUT: 0                                                                                |                                                                                       |
| 119 |    |    |    |    |    |    |
|     | 0                                                                                   | Unknown                                                                             | 0                                                                                     | 0                                                                                     | IN: 1                                                                                 |                                                                                       |
| 118 |   |   |   |   |   |   |
|     | 0                                                                                   | Unknown                                                                             | 0                                                                                     | 0                                                                                     | OUT: 0                                                                                |                                                                                       |
| 117 |  |  |  |  |  |  |
|     | 0                                                                                   | CytoplasmicMem<br>brane                                                             | 1                                                                                     | 0                                                                                     | OUT: 0                                                                                |                                                                                       |
| 116 |  |  |  |  |  |  |
|     | 0                                                                                   | Cytoplasmic                                                                         | 1                                                                                     | 0                                                                                     | OUT: 0                                                                                |                                                                                       |
| 115 |  |  |  |  |  |  |

|     |   |                     |    |   |        |  |
|-----|---|---------------------|----|---|--------|--|
|     | 0 | Cytoplasmic         | 0  | 0 | OUT: 1 |  |
| 114 |   |                     |    |   |        |  |
|     | 0 | Cytoplasmic         | 0  | 0 | OUT: 0 |  |
| 113 |   |                     |    |   |        |  |
|     | 0 | CytoplasmicMembrane | 1  | 1 | OUT: 1 |  |
| 112 |   |                     |    |   |        |  |
|     | 0 | Extracellular       | 0  | 0 | IN: 1  |  |
| 127 |   |                     |    |   |        |  |
|     | 0 | Cytoplasmic         | 0  | 0 | IN: 1  |  |
| 126 |   |                     |    |   |        |  |
|     | 5 | Cytoplasmic         | 24 | 3 | OUT: 0 |  |
| 125 |   |                     |    |   |        |  |
|     | 0 | CytoplasmicMembrane | 12 | 6 | IN: 5  |  |
| 124 |   |                     |    |   |        |  |
|     | 0 | Cytoplasmic         | 1  | 0 | OUT: 0 |  |
| 123 |   |                     |    |   |        |  |
|     | 0 | Cytoplasmic         | 16 | 0 | IN: 1  |  |
| 122 |   |                     |    |   |        |  |
|     | 0 | Cytoplasmic         | 0  | 0 | OUT: 3 |  |

|     |   |                         |   |   |        |  |
|-----|---|-------------------------|---|---|--------|--|
| 121 |   |                         |   |   |        |  |
|     | 0 | CytoplasmicMem<br>brane | 0 | 0 | IN: 9  |  |
| 120 |   |                         |   |   |        |  |
|     | 0 | CytoplasmicMem<br>brane | 0 | 0 | IN: 1  |  |
| 137 |   |                         |   |   |        |  |
|     | 0 | Unknown                 | 0 | 2 | OUT: 0 |  |
| 136 |   |                         |   |   |        |  |
|     | 0 | CytoplasmicMem<br>brane | 0 | 2 | OUT: 1 |  |
| 139 |   |                         |   |   |        |  |
|     | 0 | Cytoplasmic             | 2 | 0 | OUT: 0 |  |
| 138 |   |                         |   |   |        |  |
|     | 0 | Cytoplasmic             | 1 | 0 | OUT: 0 |  |
| 141 |   |                         |   |   |        |  |
|     | 0 | CytoplasmicMem<br>brane | 0 | 4 | OUT: 2 |  |
| 140 |   |                         |   |   |        |  |
|     | 0 | Unknown                 | 0 | 0 | OUT: 0 |  |
| 143 |   |                         |   |   |        |  |
|     | 0 | CytoplasmicMem          | 0 | 0 | IN: 6  |  |

|     |   |                     |   |    |        |  |
|-----|---|---------------------|---|----|--------|--|
|     |   | brane               |   |    |        |  |
| 142 |   |                     |   |    |        |  |
|     | 0 | Cytoplasmic         | 0 | 0  | OUT: 0 |  |
| 129 |   |                     |   |    |        |  |
|     | 0 | Unknown             | 0 | 0  | OUT: 0 |  |
| 128 |   |                     |   |    |        |  |
|     | 0 | Cytoplasmic         | 0 | 0  | IN: 0  |  |
| 131 |   |                     |   |    |        |  |
|     | 0 | CytoplasmicMembrane | 0 | 0  | OUT: 0 |  |
| 130 |   |                     |   |    |        |  |
|     | 0 | Cytoplasmic         | 0 | 0  | OUT: 0 |  |
| 133 |   |                     |   |    |        |  |
|     | 0 | OuterMembrane       | 0 | 15 | OUT: 0 |  |
| 132 |   |                     |   |    |        |  |
|     | 0 | Unknown             | 0 | 0  | OUT: 1 |  |
| 135 |   |                     |   |    |        |  |
|     | 0 | Unknown             | 0 | 0  | IN: 1  |  |
| 134 |   |                     |   |    |        |  |
|     | 0 | CytoplasmicMembrane | 2 | 0  | IN: 7  |  |

|     |   |                     |   |   |        |  |
|-----|---|---------------------|---|---|--------|--|
| 152 |   |                     |   |   |        |  |
|     | 0 | Unknown             | 1 | 0 | OUT: 0 |  |
| 153 |   |                     |   |   |        |  |
|     | 0 | CytoplasmicMembrane | 0 | 0 | IN: 12 |  |
| 154 |   |                     |   |   |        |  |
|     | 9 | Cytoplasmic         | 7 | 0 | OUT: 0 |  |
| 155 |   |                     |   |   |        |  |
|     | 0 | Cytoplasmic         | 1 | 0 | OUT: 0 |  |
| 156 |   |                     |   |   |        |  |
|     | 0 | Unknown             | 0 | 0 | IN: 3  |  |
| 157 |   |                     |   |   |        |  |
|     | 0 | Unknown             | 0 | 0 | IN: 1  |  |
| 158 |   |                     |   |   |        |  |
|     | 0 | Unknown             | 0 | 0 | OUT: 4 |  |
| 159 |   |                     |   |   |        |  |
|     | 0 | Unknown             | 0 | 0 | IN: 0  |  |
| 144 |   |                     |   |   |        |  |
|     | 0 | Cytoplasmic         | 1 | 0 | OUT: 0 |  |
| 145 |   |                     |   |   |        |  |
|     | 0 | Unknown             | 0 | 0 | IN: 1  |  |



|     |   |             |   |   |        |  |
|-----|---|-------------|---|---|--------|--|
| 146 |   |             |   |   |        |  |
|     | 0 | Cytoplasmic | 0 | 0 | OUT: 0 |  |
| 147 |   |             |   |   |        |  |
|     | 0 | Cytoplasmic | 2 | 0 | OUT: 0 |  |
| 148 |   |             |   |   |        |  |
|     | 0 | Cytoplasmic | 0 | 4 | OUT: 0 |  |
| 149 |   |             |   |   |        |  |
|     | 0 | Cytoplasmic | 0 | 0 | OUT: 0 |  |
| 150 |   |             |   |   |        |  |
|     | 0 | Unknown     | 0 | 0 | OUT: 0 |  |
| 151 |   |             |   |   |        |  |
|     | 0 | Cytoplasmic | 0 | 0 | OUT: 0 |  |
| 171 |   |             |   |   |        |  |
|     | 0 | Cytoplasmic | 0 | 0 | OUT: 0 |  |
| 170 |   |             |   |   |        |  |
|     | 0 | Unknown     | 0 | 0 | OUT: 0 |  |
| 169 |   |             |   |   |        |  |
|     | 0 | Cytoplasmic | 0 | 0 | OUT: 0 |  |
| 168 |   |             |   |   |        |  |
|     | 9 | Cytoplasmic | 3 | 0 | IN: 2  |  |

|     |   |                     |   |    |        |   |
|-----|---|---------------------|---|----|--------|---|
| 175 |   |                     |   |    |        |   |
|     | 0 | Cytoplasmic         | 5 | 0  | OUT: 0 |   |
| 174 |   |                     |   |    |        |   |
|     | 0 | Unknown             | 0 | 0  | OUT: 0 |   |
| 173 |   |                     |   |    |        |   |
|     | 0 | CytoplasmicMembrane | 1 | 0  | OUT: 0 |   |
| 172 |   |                     |   |    |        |   |
|     | 0 | CytoplasmicMembrane | 0 | 0  | OUT: 5 |   |
| 163 |   |                     |   |    |        |   |
|     | 0 | Cytoplasmic         | 0 | 0  | OUT: 0 |   |
| 162 |   |                     |   |    |        |   |
|     | 0 | Cytoplasmic         | 0 | 0  | OUT: 0 |   |
| 161 |   |                     |   |    |        |   |
|     | 0 | CytoplasmicMembrane | 0 | 66 | IN: 2  |   |
| 160 |   |                     |   |    |        |   |
|     | 0 | Cytoplasmic         | 1 | 0  | IN: 1  |   |
| 167 |   |                     |   |    |        |   |
|     | 0 | OuterMembrane       | 0 | 3  | OUT: 0 |   |
|     | . | .                   | . | .  | .      | . |

|     |   |                     |   |    |        |  |
|-----|---|---------------------|---|----|--------|--|
| 166 | 0 | Unknown             | 0 | 0  | IN: 1  |  |
| 165 |   |                     |   |    |        |  |
|     | 0 | Unknown             | 1 | 0  | IN: 1  |  |
| 164 |   |                     |   |    |        |  |
|     | 1 | Cytoplasmic         | 0 | 50 | OUT: 1 |  |
| 186 |   |                     |   |    |        |  |
|     | 0 | Cytoplasmic         | 3 | 0  | OUT: 0 |  |
| 187 |   |                     |   |    |        |  |
|     | 0 | Cytoplasmic         | 0 | 0  | OUT: 0 |  |
| 184 |   |                     |   |    |        |  |
|     | 0 | Cytoplasmic         | 1 | 0  | OUT: 0 |  |
| 185 |   |                     |   |    |        |  |
|     | 0 | Cytoplasmic         | 1 | 0  | OUT: 0 |  |
| 190 |   |                     |   |    |        |  |
|     | 0 | CytoplasmicMembrane | 2 | 1  | OUT: 3 |  |
| 191 |   |                     |   |    |        |  |
|     | 0 | Unknown             | 0 | 0  | OUT: 0 |  |
| 188 |   |                     |   |    |        |  |
|     | 0 | Cytoplasmic         | 1 | 0  | IN: 0  |  |
| 189 |   |                     |   |    |        |  |

|     |   |                     |   |   |        |  |
|-----|---|---------------------|---|---|--------|--|
|     | 0 | Unknown             | 1 | 0 | IN: 1  |  |
| 178 |   |                     |   |   |        |  |
|     | 0 | Cytoplasmic         | 0 | 0 | OUT: 0 |  |
| 179 |   |                     |   |   |        |  |
|     | 0 | Cytoplasmic         | 0 | 0 | OUT: 1 |  |
| 176 |   |                     |   |   |        |  |
|     | 0 | CytoplasmicMembrane | 2 | 0 | OUT: 0 |  |
| 177 |   |                     |   |   |        |  |
|     | 0 | CytoplasmicMembrane | 0 | 0 | IN: 1  |  |
| 182 |   |                     |   |   |        |  |
|     | 0 | Cytoplasmic         | 4 | 0 | OUT: 0 |  |
| 183 |   |                     |   |   |        |  |
|     | 0 | Unknown             | 0 | 0 | IN: 1  |  |
| 180 |   |                     |   |   |        |  |
|     | 0 | CytoplasmicMembrane | 0 | 3 | IN: 12 |  |
| 181 |   |                     |   |   |        |  |
|     | 0 | Cytoplasmic         | 0 | 0 | OUT: 0 |  |
| 205 |   |                     |   |   |        |  |
|     |   |                     |   |   |        |  |

|     |   |                         |   |   |         |  |
|-----|---|-------------------------|---|---|---------|--|
|     | 0 | Cytoplasmic             | 0 | 0 | OUT: 0  |  |
| 204 |   |                         |   |   |         |  |
|     | 0 | Cytoplasmic             | 1 | 0 | OUT: 0  |  |
| 207 |   |                         |   |   |         |  |
|     | 0 | Cytoplasmic             | 0 | 0 | IN: 1   |  |
| 206 |   |                         |   |   |         |  |
|     | 0 | CytoplasmicMem<br>brane | 6 | 0 | OUT: 14 |  |
| 201 |   |                         |   |   |         |  |
|     | 1 | CytoplasmicMem<br>brane | 1 | 0 | IN: 13  |  |
| 200 |   |                         |   |   |         |  |
|     | 0 | CytoplasmicMem<br>brane | 0 | 0 | IN: 1   |  |
| 203 |   |                         |   |   |         |  |
|     | 0 | CytoplasmicMem<br>brane | 1 | 0 | IN: 13  |  |
| 202 |   |                         |   |   |         |  |
|     | 0 | Extracellular           | 0 | 0 | OUT: 0  |  |
| 197 |   |                         |   |   |         |  |
|     | 0 | Cytoplasmic             | 0 | 0 | IN: 1   |  |
| 196 |   |                         |   |   |         |  |

|     |   |                         |    |   |        |  |
|-----|---|-------------------------|----|---|--------|--|
|     | 0 | Cytoplasmic             | 1  | 0 | OUT: 0 |  |
| 199 |   |                         |    |   |        |  |
|     | 0 | Cytoplasmic             | 0  | 0 | OUT: 0 |  |
| 198 |   |                         |    |   |        |  |
|     | 0 | Cytoplasmic             | 1  | 0 | OUT: 0 |  |
| 193 |   |                         |    |   |        |  |
|     | 0 | Unknown                 | 0  | 0 | OUT: 0 |  |
| 192 |   |                         |    |   |        |  |
|     | 0 | Cytoplasmic             | 43 | 0 | OUT: 0 |  |
| 195 |   |                         |    |   |        |  |
|     | 0 | CytoplasmicMem<br>brane | 0  | 0 | IN: 6  |  |
| 194 |   |                         |    |   |        |  |
|     | 0 | Cytoplasmic             | 1  | 0 | OUT: 0 |  |
| 220 |   |                         |    |   |        |  |
|     | 0 | Cytoplasmic             | 0  | 0 | OUT: 0 |  |
| 221 |   |                         |    |   |        |  |
|     | 0 | CytoplasmicMem<br>brane | 1  | 0 | IN: 4  |  |
| 222 |   |                         |    |   |        |  |
|     | 0 | CytoplasmicMem          | 0  | 0 | IN: 5  |  |

|     |   | brane                   |    |   |        |  |
|-----|---|-------------------------|----|---|--------|--|
| 223 |   |                         |    |   |        |  |
|     | 0 | Unknown                 | 2  | 0 | OUT: 0 |  |
| 216 |   |                         |    |   |        |  |
|     | 0 | Cytoplasmic             | 49 | 0 | OUT: 0 |  |
| 217 |   |                         |    |   |        |  |
|     | 0 | Cytoplasmic             | 7  | 0 | OUT: 1 |  |
| 218 |   |                         |    |   |        |  |
|     | 0 | Cytoplasmic             | 1  | 0 | OUT: 0 |  |
| 219 |   |                         |    |   |        |  |
|     | 0 | Cytoplasmic             | 21 | 0 | OUT: 0 |  |
| 212 |   |                         |    |   |        |  |
|     | 0 | CytoplasmicMem<br>brane | 0  | 0 | IN: 2  |  |
| 213 |   |                         |    |   |        |  |
|     | 0 | Cytoplasmic             | 28 | 1 | OUT: 1 |  |
| 214 |   |                         |    |   |        |  |
|     | 0 | CytoplasmicMem<br>brane | 13 | 3 | OUT: 0 |  |
| 215 |   |                         |    |   |        |  |
|     | 0 | Cytoplasmic             | 3  | 0 | OUT: 0 |  |

|     |    |                     |    |    |        |  |
|-----|----|---------------------|----|----|--------|--|
| 208 |    |                     |    |    |        |  |
|     | 0  | CytoplasmicMembrane | 24 | 43 | IN: 10 |  |
| 209 |    |                     |    |    |        |  |
|     | 0  | Cytoplasmic         | 1  | 0  | OUT: 0 |  |
| 210 |    |                     |    |    |        |  |
|     | 0  | CytoplasmicMembrane | 0  | 0  | OUT: 1 |  |
| 211 |    |                     |    |    |        |  |
|     | 0  | Unknown             | 0  | 0  | OUT: 0 |  |
| 239 |    |                     |    |    |        |  |
|     | 0  | Cytoplasmic         | 0  | 0  | OUT: 0 |  |
| 238 |    |                     |    |    |        |  |
|     | 12 | Cytoplasmic         | 6  | 0  | OUT: 2 |  |
| 237 |    |                     |    |    |        |  |
|     | 0  | Unknown             | 0  | 0  | OUT: 0 |  |
| 236 |    |                     |    |    |        |  |
|     | 0  | Unknown             | 0  | 0  | IN: 1  |  |
| 235 |    |                     |    |    |        |  |
|     | 0  | Periplasmic         | 0  | 18 | IN: 1  |  |
| 234 |    |                     |    |    |        |  |



|     |    |                     |    |   |        |  |
|-----|----|---------------------|----|---|--------|--|
|     | 0  | Unknown             | 0  | 0 | OUT: 0 |  |
| 233 |    |                     |    |   |        |  |
|     | 0  | Cytoplasmic         | 1  | 0 | OUT: 0 |  |
| 232 |    |                     |    |   |        |  |
|     | 0  | Unknown             | 0  | 0 | OUT: 0 |  |
| 231 |    |                     |    |   |        |  |
|     | 0  | CytoplasmicMembrane | 28 | 5 | OUT: 2 |  |
| 230 |    |                     |    |   |        |  |
|     | 0  | Unknown             | 0  | 0 | OUT: 2 |  |
| 229 |    |                     |    |   |        |  |
|     | 0  | Unknown             | 0  | 0 | IN: 3  |  |
| 228 |    |                     |    |   |        |  |
|     | 0  | Unknown             | 0  | 0 | OUT: 0 |  |
| 227 |    |                     |    |   |        |  |
|     | 0  | Unknown             | 1  | 0 | OUT: 1 |  |
| 226 |    |                     |    |   |        |  |
|     | 14 | Cytoplasmic         | 23 | 0 | OUT: 0 |  |
| 225 |    |                     |    |   |        |  |
|     | 0  | Unknown             | 0  | 0 | OUT: 0 |  |
| 224 |    |                     |    |   |        |  |

|     |    |                     |   |   |        |  |
|-----|----|---------------------|---|---|--------|--|
|     | 0  | CytoplasmicMembrane | 0 | 3 | OUT: 2 |  |
| 254 |    |                     |   |   |        |  |
|     | 0  | OuterMembrane       | 0 | 0 | OUT: 0 |  |
| 255 |    |                     |   |   |        |  |
|     | 0  | Cytoplasmic         | 1 | 0 | OUT: 0 |  |
| 252 |    |                     |   |   |        |  |
|     | 0  | Unknown             | 0 | 0 | OUT: 0 |  |
| 253 |    |                     |   |   |        |  |
|     | 0  | Cytoplasmic         | 0 | 0 | OUT: 0 |  |
| 250 |    |                     |   |   |        |  |
|     | 0  | Unknown             | 0 | 0 | OUT: 3 |  |
| 251 |    |                     |   |   |        |  |
|     | 0  | Cytoplasmic         | 0 | 0 | OUT: 0 |  |
| 248 |    |                     |   |   |        |  |
|     | 0  | Unknown             | 1 | 0 | OUT: 1 |  |
| 249 |    |                     |   |   |        |  |
|     | 0  | Unknown             | 0 | 2 | IN: 3  |  |
| 246 |    |                     |   |   |        |  |
|     | 27 | Cytoplasmic         | 6 | 0 | OUT: 1 |  |
| 247 |    |                     |   |   |        |  |

|     |   |                     |   |   |        |  |
|-----|---|---------------------|---|---|--------|--|
|     | 0 | Cytoplasmic         | 0 | 0 | OUT: 0 |  |
| 244 |   |                     |   |   |        |  |
|     | 0 | Unknown             | 0 | 0 | OUT: 0 |  |
| 245 |   |                     |   |   |        |  |
|     | 0 | Unknown             | 0 | 0 | OUT: 0 |  |
| 242 |   |                     |   |   |        |  |
|     | 0 | Cytoplasmic         | 0 | 0 | OUT: 0 |  |
| 243 |   |                     |   |   |        |  |
|     | 0 | Cytoplasmic         | 0 | 0 | OUT: 0 |  |
| 240 |   |                     |   |   |        |  |
|     | 0 | CytoplasmicMembrane | 1 | 0 | OUT: 4 |  |
| 241 |   |                     |   |   |        |  |
|     | 0 | Unknown             | 0 | 0 | OUT: 0 |  |
| 275 |   |                     |   |   |        |  |
|     | 0 | Unknown             | 0 | 0 | IN: 1  |  |
| 274 |   |                     |   |   |        |  |
|     | 0 | Unknown             | 1 | 0 | OUT: 0 |  |
| 273 |   |                     |   |   |        |  |
|     | 0 | Unknown             | 0 | 0 | OUT: 0 |  |
| 272 |   |                     |   |   |        |  |

|     |   |                         |    |   |        |  |
|-----|---|-------------------------|----|---|--------|--|
|     | 0 | Cytoplasmic             | 15 | 0 | OUT: 0 |  |
| 279 |   |                         |    |   |        |  |
|     | 0 | Cytoplasmic             | 1  | 0 | OUT: 0 |  |
| 278 |   |                         |    |   |        |  |
|     | 0 | Unknown                 | 0  | 0 | OUT: 1 |  |
| 277 |   |                         |    |   |        |  |
|     | 0 | Unknown                 | 0  | 0 | OUT: 0 |  |
| 276 |   |                         |    |   |        |  |
|     | 0 | Unknown                 | 7  | 0 | OUT: 0 |  |
| 283 |   |                         |    |   |        |  |
|     | 8 | Cytoplasmic             | 7  | 0 | OUT: 0 |  |
| 282 |   |                         |    |   |        |  |
|     | 0 | Cytoplasmic             | 15 | 0 | OUT: 2 |  |
| 281 |   |                         |    |   |        |  |
|     | 0 | CytoplasmicMem<br>brane | 0  | 0 | OUT: 7 |  |
| 280 |   |                         |    |   |        |  |
|     | 0 | Unknown                 | 0  | 0 | OUT: 0 |  |
| 287 |   |                         |    |   |        |  |
|     | 0 | CytoplasmicMem<br>brane | 0  | 3 | IN: 12 |  |

|     |    |                         |   |    |         |  |
|-----|----|-------------------------|---|----|---------|--|
| 286 |    |                         |   |    |         |  |
|     | 0  | Unknown                 | 1 | 0  | OUT: 0  |  |
| 285 |    |                         |   |    |         |  |
|     | 0  | Extracellular           | 1 | 69 | OUT: 0  |  |
| 284 |    |                         |   |    |         |  |
|     | 0  | Unknown                 | 1 | 0  | OUT: 1  |  |
| 258 |    |                         |   |    |         |  |
|     | 0  | CytoplasmicMem<br>brane | 1 | 0  | IN: 1   |  |
| 259 |    |                         |   |    |         |  |
|     | 34 | Cytoplasmic             | 0 | 0  | OUT: 0  |  |
| 256 |    |                         |   |    |         |  |
|     | 0  | Cytoplasmic             | 0 | 0  | OUT: 0  |  |
| 257 |    |                         |   |    |         |  |
|     | 0  | Unknown                 | 0 | 0  | OUT: 0  |  |
| 262 |    |                         |   |    |         |  |
|     | 0  | CytoplasmicMem<br>brane | 0 | 0  | OUT: 12 |  |
| 263 |    |                         |   |    |         |  |
|     | 0  | Cytoplasmic             | 0 | 0  | IN: 0   |  |
| 260 |    |                         |   |    |         |  |

|     |    |                     |    |    |        |  |
|-----|----|---------------------|----|----|--------|--|
|     | 0  | Cytoplasmic         | 0  | 0  | OUT: 0 |  |
| 261 |    |                     |    |    |        |  |
|     | 0  | Cytoplasmic         | 6  | 8  | IN: 1  |  |
| 266 |    |                     |    |    |        |  |
|     | 0  | Cytoplasmic         | 0  | 3  | IN: 1  |  |
| 267 |    |                     |    |    |        |  |
|     | 0  | Cytoplasmic         | 1  | 0  | OUT: 0 |  |
| 264 |    |                     |    |    |        |  |
|     | 0  | CytoplasmicMembrane | 0  | 0  | IN: 3  |  |
| 265 |    |                     |    |    |        |  |
|     | 0  | OuterMembrane       | 0  | 15 | OUT: 0 |  |
| 270 |    |                     |    |    |        |  |
|     | 0  | Cytoplasmic         | 0  | 0  | OUT: 0 |  |
| 271 |    |                     |    |    |        |  |
|     | 0  | Cytoplasmic         | 12 | 3  | OUT: 0 |  |
| 268 |    |                     |    |    |        |  |
|     | 13 | Cytoplasmic         | 21 | 0  | OUT: 0 |  |
| 269 |    |                     |    |    |        |  |
|     | 0  | Cytoplasmic         | 13 | 1  | OUT: 0 |  |
| 305 |    |                     |    |    |        |  |

|     |    |                         |    |   |        |  |
|-----|----|-------------------------|----|---|--------|--|
|     | 0  | CytoplasmicMem<br>brane | 0  | 0 | IN: 4  |  |
| 304 |    |                         |    |   |        |  |
|     | 0  | Cytoplasmic             | 0  | 4 | IN: 0  |  |
| 307 |    |                         |    |   |        |  |
|     | 0  | Periplasmic             | 0  | 0 | IN: 1  |  |
| 306 |    |                         |    |   |        |  |
|     | 0  | Cytoplasmic             | 1  | 0 | OUT: 0 |  |
| 309 |    |                         |    |   |        |  |
|     | 0  | CytoplasmicMem<br>brane | 3  | 0 | OUT: 0 |  |
| 308 |    |                         |    |   |        |  |
|     | 0  | Unknown                 | 1  | 0 | OUT: 0 |  |
| 311 |    |                         |    |   |        |  |
|     | 0  | Cytoplasmic             | 0  | 0 | OUT: 0 |  |
| 310 |    |                         |    |   |        |  |
|     | 5  | Cytoplasmic             | 7  | 0 | OUT: 0 |  |
| 313 |    |                         |    |   |        |  |
|     | 10 | Cytoplasmic             | 22 | 0 | OUT: 0 |  |
| 312 |    |                         |    |   |        |  |
|     | 0  | Cytoplasmic             | 21 | 0 | OUT: 3 |  |

|     |   |                         |   |   |        |  |
|-----|---|-------------------------|---|---|--------|--|
| 315 |   |                         |   |   |        |  |
|     | 0 | Cytoplasmic             | 0 | 0 | OUT: 0 |  |
| 314 |   |                         |   |   |        |  |
|     | 0 | Cytoplasmic             | 0 | 0 | OUT: 0 |  |
| 317 |   |                         |   |   |        |  |
|     | 0 | Unknown                 | 1 | 0 | IN: 1  |  |
| 316 |   |                         |   |   |        |  |
|     | 0 | CytoplasmicMem<br>brane | 0 | 0 | IN: 4  |  |
| 319 |   |                         |   |   |        |  |
|     | 0 | Cytoplasmic             | 0 | 6 | OUT: 0 |  |
| 318 |   |                         |   |   |        |  |
|     | 0 | Cytoplasmic             | 1 | 0 | OUT: 0 |  |
| 288 |   |                         |   |   |        |  |
|     | 0 | Cytoplasmic             | 0 | 0 | OUT: 0 |  |
| 289 |   |                         |   |   |        |  |
|     | 0 | CytoplasmicMem<br>brane | 3 | 0 | IN: 10 |  |
| 290 |   |                         |   |   |        |  |
|     | 0 | Cytoplasmic             | 0 | 0 | OUT: 0 |  |
| 291 |   |                         |   |   |        |  |
|     |   |                         |   |   |        |  |



|     |   |                     |   |    |         |  |
|-----|---|---------------------|---|----|---------|--|
|     | 0 | Unknown             | 1 | 0  | OUT: 1  |  |
| 292 |   |                     |   |    |         |  |
|     | 0 | Unknown             | 0 | 3  | OUT: 3  |  |
| 293 |   |                     |   |    |         |  |
|     | 0 | Cytoplasmic         | 0 | 0  | OUT: 0  |  |
| 294 |   |                     |   |    |         |  |
|     | 0 | Cytoplasmic         | 0 | 0  | OUT: 0  |  |
| 295 |   |                     |   |    |         |  |
|     | 0 | CytoplasmicMembrane | 1 | 0  | OUT: 11 |  |
| 296 |   |                     |   |    |         |  |
|     | 0 | Unknown             | 0 | 0  | OUT: 2  |  |
| 297 |   |                     |   |    |         |  |
|     | 0 | Cytoplasmic         | 0 | 0  | OUT: 0  |  |
| 298 |   |                     |   |    |         |  |
|     | 0 | Cytoplasmic         | 0 | 18 | OUT: 0  |  |
| 299 |   |                     |   |    |         |  |
|     | 0 | CytoplasmicMembrane | 0 | 0  | IN: 7   |  |
| 300 |   |                     |   |    |         |  |
|     | 0 | Cytoplasmic         | 1 | 0  | IN: 1   |  |

|     |   |                         |    |   |        |  |
|-----|---|-------------------------|----|---|--------|--|
| 301 |   |                         |    |   |        |  |
|     | 0 | Unknown                 | 0  | 0 | OUT: 0 |  |
| 302 |   |                         |    |   |        |  |
|     | 0 | Cytoplasmic             | 1  | 0 | OUT: 0 |  |
| 303 |   |                         |    |   |        |  |
|     | 0 | Cytoplasmic             | 26 | 0 | IN: 0  |  |
| 343 |   |                         |    |   |        |  |
|     | 0 | Unknown                 | 0  | 0 | OUT: 0 |  |
| 342 |   |                         |    |   |        |  |
|     | 0 | Unknown                 | 0  | 0 | OUT: 0 |  |
| 341 |   |                         |    |   |        |  |
|     | 0 | Cytoplasmic             | 1  | 0 | OUT: 0 |  |
| 340 |   |                         |    |   |        |  |
|     | 0 | Cytoplasmic             | 3  | 0 | OUT: 0 |  |
| 339 |   |                         |    |   |        |  |
|     | 0 | Cytoplasmic             | 25 | 0 | OUT: 0 |  |
| 338 |   |                         |    |   |        |  |
|     | 0 | CytoplasmicMem<br>brane | 0  | 0 | OUT: 0 |  |
| 337 |   |                         |    |   |        |  |
|     | 0 | CytoplasmicMem          | 0  | 0 | IN: 1  |  |

|     |   | brane                   |    |     |        |  |
|-----|---|-------------------------|----|-----|--------|--|
| 336 |   |                         |    |     |        |  |
|     | 0 | Cytoplasmic             | 0  | 0   | OUT: 0 |  |
| 351 |   |                         |    |     |        |  |
|     | 0 | Cytoplasmic             | 1  | 0   | OUT: 0 |  |
| 350 |   |                         |    |     |        |  |
|     | 0 | Unknown                 | 0  | 0   | OUT: 0 |  |
| 349 |   |                         |    |     |        |  |
|     | 0 | CytoplasmicMem<br>brane | 1  | 0   | IN: 12 |  |
| 348 |   |                         |    |     |        |  |
|     | 0 | Unknown                 | 0  | 0   | OUT: 1 |  |
| 347 |   |                         |    |     |        |  |
|     | 0 | Periplasmic             | 0  | 0   | IN: 1  |  |
| 346 |   |                         |    |     |        |  |
|     | 0 | Cytoplasmic             | 6  | 155 | IN: 0  |  |
| 345 |   |                         |    |     |        |  |
|     | 0 | CytoplasmicMem<br>brane | 0  | 0   | IN: 4  |  |
| 344 |   |                         |    |     |        |  |
|     | 0 | Cytoplasmic             | 17 | 0   | OUT: 0 |  |

|     |   |                         |    |    |         |  |
|-----|---|-------------------------|----|----|---------|--|
| 326 |   |                         |    |    |         |  |
|     | 0 | Unknown                 | 0  | 0  | IN: 5   |  |
| 327 |   |                         |    |    |         |  |
|     | 0 | Cytoplasmic             | 27 | 0  | OUT: 0  |  |
| 324 |   |                         |    |    |         |  |
|     | 0 | Cytoplasmic             | 0  | 0  | OUT: 0  |  |
| 325 |   |                         |    |    |         |  |
|     | 0 | Cytoplasmic             | 1  | 0  | OUT: 0  |  |
| 322 |   |                         |    |    |         |  |
|     | 0 | Cytoplasmic             | 0  | 0  | OUT: 1  |  |
| 323 |   |                         |    |    |         |  |
|     | 0 | Unknown                 | 0  | 0  | IN: 1   |  |
| 320 |   |                         |    |    |         |  |
|     | 0 | Cytoplasmic             | 0  | 16 | OUT: 0  |  |
| 321 |   |                         |    |    |         |  |
|     | 0 | CytoplasmicMem<br>brane | 0  | 0  | OUT: 13 |  |
| 334 |   |                         |    |    |         |  |
|     | 0 | Unknown                 | 0  | 0  | OUT: 0  |  |
| 335 |   |                         |    |    |         |  |
|     | 0 | Cytoplasmic             | 13 | 3  | OUT: 0  |  |

|     |    |               |    |   |        |  |
|-----|----|---------------|----|---|--------|--|
| 332 |    |               |    |   |        |  |
|     | 0  | Cytoplasmic   | 16 | 1 | IN: 0  |  |
| 333 |    |               |    |   |        |  |
|     | 10 | Cytoplasmic   | 18 | 0 | OUT: 0 |  |
| 330 |    |               |    |   |        |  |
|     | 0  | Unknown       | 0  | 0 | OUT: 0 |  |
| 331 |    |               |    |   |        |  |
|     | 0  | Extracellular | 0  | 0 | OUT: 0 |  |
| 328 |    |               |    |   |        |  |
|     | 0  | Cytoplasmic   | 0  | 0 | OUT: 0 |  |
| 329 |    |               |    |   |        |  |
|     | 0  | Cytoplasmic   | 0  | 0 | OUT: 0 |  |
| 373 |    |               |    |   |        |  |
|     | 0  | Cytoplasmic   | 3  | 0 | IN: 0  |  |
| 372 |    |               |    |   |        |  |
|     | 0  | Unknown       | 0  | 0 | OUT: 0 |  |
| 375 |    |               |    |   |        |  |
|     | 0  | Cytoplasmic   | 27 | 0 | IN: 2  |  |
| 374 |    |               |    |   |        |  |
|     | 0  | Cytoplasmic   | 9  | 0 | OUT: 0 |  |

|     |   |                         |   |   |        |  |
|-----|---|-------------------------|---|---|--------|--|
| 369 |   |                         |   |   |        |  |
|     | 0 | Cytoplasmic             | 1 | 1 | IN: 1  |  |
| 368 |   |                         |   |   |        |  |
|     | 0 | Cytoplasmic             | 0 | 0 | OUT: 0 |  |
| 371 |   |                         |   |   |        |  |
|     | 0 | Unknown                 | 0 | 0 | OUT: 0 |  |
| 370 |   |                         |   |   |        |  |
|     | 0 | Cytoplasmic             | 1 | 0 | OUT: 0 |  |
| 381 |   |                         |   |   |        |  |
|     | 0 | Unknown                 | 1 | 6 | IN: 0  |  |
| 380 |   |                         |   |   |        |  |
|     | 0 | CytoplasmicMem<br>brane | 0 | 0 | OUT: 0 |  |
| 383 |   |                         |   |   |        |  |
|     | 0 | CytoplasmicMem<br>brane | 1 | 2 | OUT: 7 |  |
| 382 |   |                         |   |   |        |  |
|     | 5 | Cytoplasmic             | 4 | 0 | OUT: 0 |  |
| 377 |   |                         |   |   |        |  |
|     | 0 | Unknown                 | 0 | 0 | IN: 1  |  |
| 376 |   |                         |   |   |        |  |
|     |   |                         |   |   |        |  |

|     |   |                     |   |     |        |  |
|-----|---|---------------------|---|-----|--------|--|
|     | 0 | Cytoplasmic         | 1 | 0   | IN: 0  |  |
| 379 |   |                     |   |     |        |  |
|     | 0 | CytoplasmicMembrane | 1 | 0   | IN: 5  |  |
| 378 |   |                     |   |     |        |  |
|     | 0 | Cytoplasmic         | 2 | 102 | OUT: 0 |  |
| 356 |   |                     |   |     |        |  |
|     | 0 | Cytoplasmic         | 0 | 9   | OUT: 0 |  |
| 357 |   |                     |   |     |        |  |
|     | 0 | Cytoplasmic         | 1 | 0   | OUT: 0 |  |
| 358 |   |                     |   |     |        |  |
|     | 0 | Unknown             | 0 | 15  | OUT: 0 |  |
| 359 |   |                     |   |     |        |  |
|     | 0 | Cytoplasmic         | 0 | 0   | OUT: 0 |  |
| 352 |   |                     |   |     |        |  |
|     | 0 | CytoplasmicMembrane | 1 | 0   | OUT: 1 |  |
| 353 |   |                     |   |     |        |  |
|     | 0 | CytoplasmicMembrane | 2 | 1   | OUT: 0 |  |
| 354 |   |                     |   |     |        |  |
|     |   |                     |   |     |        |  |

|     |    |             |    |   |        |  |
|-----|----|-------------|----|---|--------|--|
|     | 0  | Unknown     | 0  | 0 | IN: 5  |  |
| 355 |    |             |    |   |        |  |
|     | 0  | Cytoplasmic | 8  | 0 | OUT: 0 |  |
| 364 |    |             |    |   |        |  |
|     | 0  | Cytoplasmic | 1  | 0 | IN: 1  |  |
| 365 |    |             |    |   |        |  |
|     | 0  | Cytoplasmic | 1  | 0 | OUT: 2 |  |
| 366 |    |             |    |   |        |  |
|     | 0  | Unknown     | 0  | 0 | OUT: 0 |  |
| 367 |    |             |    |   |        |  |
|     | 0  | Cytoplasmic | 17 | 0 | OUT: 0 |  |
| 360 |    |             |    |   |        |  |
|     | 0  | Cytoplasmic | 0  | 0 | OUT: 0 |  |
| 361 |    |             |    |   |        |  |
|     | 0  | Unknown     | 0  | 0 | OUT: 0 |  |
| 362 |    |             |    |   |        |  |
|     | 11 | Cytoplasmic | 34 | 0 | OUT: 0 |  |
| 363 |    |             |    |   |        |  |
|     | 0  | Cytoplasmic | 0  | 0 | IN: 1  |  |
| 410 |    |             |    |   |        |  |
|     |    |             |    |   |        |  |



|     |                                                                                     |                                                                                     |                                                                                       |                                                                                       |                                                                                       |                                                                                       |
|-----|-------------------------------------------------------------------------------------|-------------------------------------------------------------------------------------|---------------------------------------------------------------------------------------|---------------------------------------------------------------------------------------|---------------------------------------------------------------------------------------|---------------------------------------------------------------------------------------|
|     | 171                                                                                 | CytoplasmicMem<br>brane                                                             | 22                                                                                    | 0                                                                                     | IN: 3                                                                                 |                                                                                       |
| 411 |    |    |    |    |    |    |
|     | 0                                                                                   | Cytoplasmic                                                                         | 0                                                                                     | 0                                                                                     | IN: 1                                                                                 |                                                                                       |
| 408 |    |    |    |    |    |    |
|     | 0                                                                                   | Unknown                                                                             | 0                                                                                     | 0                                                                                     | IN: 1                                                                                 |                                                                                       |
| 409 |    |    |    |    |    |    |
|     | 0                                                                                   | Cytoplasmic                                                                         | 0                                                                                     | 0                                                                                     | OUT: 0                                                                                |                                                                                       |
| 414 |    |    |    |    |    |    |
|     | 0                                                                                   | Cytoplasmic                                                                         | 0                                                                                     | 0                                                                                     | IN: 1                                                                                 |                                                                                       |
| 415 |    |    |    |    |    |    |
|     | 0                                                                                   | CytoplasmicMem<br>brane                                                             | 0                                                                                     | 5                                                                                     | IN: 2                                                                                 |                                                                                       |
| 412 |    |    |    |    |    |    |
|     | 23                                                                                  | Cytoplasmic                                                                         | 25                                                                                    | 0                                                                                     | OUT: 0                                                                                |                                                                                       |
| 413 |  |  |  |  |  |  |
|     | 0                                                                                   | Cytoplasmic                                                                         | 0                                                                                     | 0                                                                                     | OUT: 0                                                                                |                                                                                       |
| 402 |  |  |  |  |  |  |
|     | 0                                                                                   | Unknown                                                                             | 0                                                                                     | 0                                                                                     | OUT: 0                                                                                |                                                                                       |
| 403 |  |  |  |  |  |  |
|     | 0                                                                                   | CytoplasmicMem                                                                      | 0                                                                                     | 0                                                                                     | OUT: 7                                                                                |                                                                                       |

|     |   | brane               |    |   |        |  |
|-----|---|---------------------|----|---|--------|--|
| 400 |   |                     |    |   |        |  |
|     | 0 | Cytoplasmic         | 12 | 4 | OUT: 0 |  |
| 401 |   |                     |    |   |        |  |
|     | 0 | Cytoplasmic         | 0  | 0 | OUT: 0 |  |
| 406 |   |                     |    |   |        |  |
|     | 0 | CytoplasmicMembrane | 0  | 0 | OUT: 0 |  |
| 407 |   |                     |    |   |        |  |
|     | 0 | Unknown             | 0  | 0 | OUT: 0 |  |
| 404 |   |                     |    |   |        |  |
|     | 0 | Unknown             | 0  | 0 | OUT: 2 |  |
| 405 |   |                     |    |   |        |  |
|     | 0 | Unknown             | 1  | 0 | OUT: 0 |  |
| 395 |   |                     |    |   |        |  |
|     | 0 | Periplasmic         | 0  | 0 | OUT: 2 |  |
| 394 |   |                     |    |   |        |  |
|     | 0 | Cytoplasmic         | 0  | 0 | OUT: 0 |  |
| 393 |   |                     |    |   |        |  |
|     | 0 | Unknown             | 0  | 1 | OUT: 0 |  |
| 392 |   |                     |    |   |        |  |

|     |    |                     |   |   |         |  |
|-----|----|---------------------|---|---|---------|--|
|     | 0  | Cytoplasmic         | 0 | 0 | OUT: 2  |  |
| 399 |    |                     |   |   |         |  |
|     | 0  | Cytoplasmic         | 0 | 0 | IN: 1   |  |
| 398 |    |                     |   |   |         |  |
|     | 0  | Cytoplasmic         | 0 | 0 | OUT: 0  |  |
| 397 |    |                     |   |   |         |  |
|     | 0  | Unknown             | 0 | 0 | OUT: 0  |  |
| 396 |    |                     |   |   |         |  |
|     | 0  | OuterMembrane       | 1 | 0 | IN: 1   |  |
| 387 |    |                     |   |   |         |  |
|     | 0  | Cytoplasmic         | 0 | 0 | OUT: 0  |  |
| 386 |    |                     |   |   |         |  |
|     | 0  | Cytoplasmic         | 1 | 0 | OUT: 0  |  |
| 385 |    |                     |   |   |         |  |
|     | 0  | CytoplasmicMembrane | 0 | 0 | OUT: 13 |  |
| 384 |    |                     |   |   |         |  |
|     | 11 | Cytoplasmic         | 1 | 0 | OUT: 0  |  |
| 391 |    |                     |   |   |         |  |
|     | 0  | CytoplasmicMembrane | 2 | 1 | IN: 5   |  |

|     |    |                     |    |    |         |   |
|-----|----|---------------------|----|----|---------|---|
| 390 |    |                     |    |    |         |   |
|     | 0  | Cytoplasmic         | 0  | 0  | OUT: 0  |   |
| 389 |    |                     |    |    |         |   |
|     | 0  | CytoplasmicMembrane | 0  | 0  | IN: 2   |   |
| 388 |    |                     |    |    |         |   |
|     | 0  | Cytoplasmic         | 1  | 0  | OUT: 2  |   |
| 440 |    |                     |    |    |         |   |
|     | 0  | Unknown             | 0  | 3  | IN: 1   |   |
| 441 |    |                     |    |    |         |   |
|     | 14 | CytoplasmicMembrane | 1  | 0  | IN: 13  |   |
| 442 |    |                     |    |    |         |   |
|     | 0  | Cytoplasmic         | 0  | 0  | OUT: 0  |   |
| 443 |    |                     |    |    |         |   |
|     | 0  | Cytoplasmic         | 28 | 81 | OUT: 0  |   |
| 444 |    |                     |    |    |         |   |
|     | 1  | Cytoplasmic         | 26 | 0  | OUT: 0  |   |
| 445 |    |                     |    |    |         |   |
|     | 0  | CytoplasmicMembrane | 0  | 0  | OUT: 11 |   |
|     | .  | .                   | .  | .  | .       | . |

|     |     |                         |   |   |         |  |
|-----|-----|-------------------------|---|---|---------|--|
| 446 | 0   | Cytoplasmic             | 0 | 0 | IN: 1   |  |
| 447 |     |                         |   |   |         |  |
|     | 0   | Cytoplasmic             | 6 | 0 | OUT: 0  |  |
| 432 |     |                         |   |   |         |  |
|     | 0   | Unknown                 | 0 | 0 | OUT: 1  |  |
| 433 |     |                         |   |   |         |  |
|     | 4   | Cytoplasmic             | 2 | 0 | OUT: 0  |  |
| 434 |     |                         |   |   |         |  |
|     | 0   | Unknown                 | 0 | 0 | OUT: 0  |  |
| 435 |     |                         |   |   |         |  |
|     | 0   | Unknown                 | 0 | 0 | IN: 1   |  |
| 436 |     |                         |   |   |         |  |
|     | 0   | Cytoplasmic             | 0 | 0 | OUT: 0  |  |
| 437 |     |                         |   |   |         |  |
|     | 250 | CytoplasmicMem<br>brane | 7 | 0 | OUT: 18 |  |
| 438 |     |                         |   |   |         |  |
|     | 0   | Cytoplasmic             | 5 | 0 | OUT: 0  |  |
| 439 |     |                         |   |   |         |  |
|     | 0   | Unknown                 | 0 | 0 | OUT: 0  |  |
| 425 |     |                         |   |   |         |  |

|     |   |               |    |    |        |  |
|-----|---|---------------|----|----|--------|--|
|     | 0 | Cytoplasmic   | 17 | 24 | OUT: 0 |  |
| 424 |   |               |    |    |        |  |
|     | 0 | Cytoplasmic   | 0  | 0  | OUT: 0 |  |
| 427 |   |               |    |    |        |  |
|     | 0 | Cytoplasmic   | 0  | 0  | IN: 0  |  |
| 426 |   |               |    |    |        |  |
|     | 0 | Extracellular | 0  | 4  | OUT: 0 |  |
| 429 |   |               |    |    |        |  |
|     | 0 | Unknown       | 0  | 0  | OUT: 0 |  |
| 428 |   |               |    |    |        |  |
|     | 0 | Unknown       | 1  | 0  | OUT: 0 |  |
| 431 |   |               |    |    |        |  |
|     | 0 | Cytoplasmic   | 2  | 0  | OUT: 0 |  |
| 430 |   |               |    |    |        |  |
|     | 0 | Cytoplasmic   | 0  | 0  | OUT: 0 |  |
| 417 |   |               |    |    |        |  |
|     | 0 | Cytoplasmic   | 1  | 0  | OUT: 0 |  |
| 416 |   |               |    |    |        |  |
|     | 0 | Cytoplasmic   | 0  | 0  | OUT: 0 |  |
| 419 |   |               |    |    |        |  |
|     |   |               |    |    |        |  |

|     |   |                     |   |   |        |  |
|-----|---|---------------------|---|---|--------|--|
|     | 0 | OuterMembrane       | 1 | 0 | OUT: 0 |  |
| 418 |   |                     |   |   |        |  |
|     | 0 | Unknown             | 1 | 0 | OUT: 0 |  |
| 421 |   |                     |   |   |        |  |
|     | 0 | Unknown             | 1 | 0 | OUT: 0 |  |
| 420 |   |                     |   |   |        |  |
|     | 0 | Cytoplasmic         | 0 | 0 | IN: 1  |  |
| 423 |   |                     |   |   |        |  |
|     | 0 | Cytoplasmic         | 0 | 0 | OUT: 0 |  |
| 422 |   |                     |   |   |        |  |
|     | 0 | Cytoplasmic         | 4 | 0 | OUT: 0 |  |
| 478 |   |                     |   |   |        |  |
|     | 0 | CytoplasmicMembrane | 0 | 0 | IN: 2  |  |
| 479 |   |                     |   |   |        |  |
|     | 0 | Cytoplasmic         | 0 | 0 | OUT: 0 |  |
| 476 |   |                     |   |   |        |  |
|     | 0 | Cytoplasmic         | 0 | 0 | OUT: 0 |  |
| 477 |   |                     |   |   |        |  |
|     | 0 | Cytoplasmic         | 0 | 0 | IN: 1  |  |
| 474 |   |                     |   |   |        |  |

|     |   |                     |   |   |         |  |
|-----|---|---------------------|---|---|---------|--|
|     | 0 | Cytoplasmic         | 2 | 0 | OUT: 0  |  |
| 475 |   |                     |   |   |         |  |
|     | 0 | CytoplasmicMembrane | 0 | 0 | IN: 1   |  |
| 472 |   |                     |   |   |         |  |
|     | 0 | CytoplasmicMembrane | 0 | 0 | OUT: 14 |  |
| 473 |   |                     |   |   |         |  |
|     | 0 | Cytoplasmic         | 0 | 3 | OUT: 0  |  |
| 470 |   |                     |   |   |         |  |
|     | 0 | Unknown             | 1 | 0 | IN: 3   |  |
| 471 |   |                     |   |   |         |  |
|     | 0 | Cytoplasmic         | 0 | 0 | OUT: 2  |  |
| 468 |   |                     |   |   |         |  |
|     | 0 | Cytoplasmic         | 0 | 0 | OUT: 1  |  |
| 469 |   |                     |   |   |         |  |
|     | 0 | Cytoplasmic         | 1 | 0 | OUT: 1  |  |
| 466 |   |                     |   |   |         |  |
|     | 0 | OuterMembrane       | 0 | 0 | OUT: 0  |  |
| 467 |   |                     |   |   |         |  |
|     | 0 | Unknown             | 0 | 0 | IN: 3   |  |



|     |   |                     |    |   |         |  |
|-----|---|---------------------|----|---|---------|--|
| 464 |   |                     |    |   |         |  |
|     | 0 | CytoplasmicMembrane | 0  | 0 | IN: 6   |  |
| 465 |   |                     |    |   |         |  |
|     | 0 | CytoplasmicMembrane | 0  | 3 | IN: 3   |  |
| 463 |   |                     |    |   |         |  |
|     | 0 | Cytoplasmic         | 2  | 0 | OUT: 0  |  |
| 462 |   |                     |    |   |         |  |
|     | 0 | Unknown             | 0  | 0 | OUT: 0  |  |
| 461 |   |                     |    |   |         |  |
|     | 0 | CytoplasmicMembrane | 1  | 0 | IN: 1   |  |
| 460 |   |                     |    |   |         |  |
|     | 0 | Unknown             | 0  | 0 | IN: 3   |  |
| 459 |   |                     |    |   |         |  |
|     | 0 | CytoplasmicMembrane | 20 | 0 | OUT: 10 |  |
| 458 |   |                     |    |   |         |  |
|     | 0 | Cytoplasmic         | 24 | 0 | IN: 0   |  |
| 457 |   |                     |    |   |         |  |
|     | 0 | Unknown             | 0  | 0 | IN: 1   |  |

|     |     |                     |    |   |        |  |
|-----|-----|---------------------|----|---|--------|--|
| 456 |     |                     |    |   |        |  |
|     | 0   | Unknown             | 0  | 0 | OUT: 0 |  |
| 455 |     |                     |    |   |        |  |
|     | 16  | Cytoplasmic         | 23 | 2 | IN: 1  |  |
| 454 |     |                     |    |   |        |  |
|     | 30  | CytoplasmicMembrane | 4  | 0 | OUT: 0 |  |
| 453 |     |                     |    |   |        |  |
|     | 126 | Cytoplasmic         | 11 | 1 | OUT: 0 |  |
| 452 |     |                     |    |   |        |  |
|     | 7   | Cytoplasmic         | 3  | 0 | IN: 1  |  |
| 451 |     |                     |    |   |        |  |
|     | 0   | Cytoplasmic         | 0  | 0 | OUT: 0 |  |
| 450 |     |                     |    |   |        |  |
|     | 0   | Cytoplasmic         | 0  | 0 | OUT: 0 |  |
| 449 |     |                     |    |   |        |  |
|     | 6   | Cytoplasmic         | 24 | 0 | OUT: 0 |  |
| 448 |     |                     |    |   |        |  |
|     | 0   | Unknown             | 0  | 0 | OUT: 0 |  |
| 508 |     |                     |    |   |        |  |
|     | 0   | CytoplasmicMem      | 14 | 9 | OUT: 0 |  |

|     |    |                         |    |    |        |  |
|-----|----|-------------------------|----|----|--------|--|
|     |    | brane                   |    |    |        |  |
| 509 |    |                         |    |    |        |  |
|     | 0  | Cytoplasmic             | 1  | 0  | IN: 1  |  |
| 510 |    |                         |    |    |        |  |
|     | 0  | CytoplasmicMem<br>brane | 0  | 0  | IN: 7  |  |
| 511 |    |                         |    |    |        |  |
|     | 0  | Unknown                 | 0  | 0  | OUT: 0 |  |
| 504 |    |                         |    |    |        |  |
|     | 0  | Cytoplasmic             | 1  | 1  | OUT: 0 |  |
| 505 |    |                         |    |    |        |  |
|     | 69 | CytoplasmicMem<br>brane | 10 | 33 | IN: 5  |  |
| 506 |    |                         |    |    |        |  |
|     | 0  | Cytoplasmic             | 0  | 0  | OUT: 1 |  |
| 507 |    |                         |    |    |        |  |
|     | 0  | Cytoplasmic             | 0  | 4  | IN: 1  |  |
| 500 |    |                         |    |    |        |  |
|     | 0  | Unknown                 | 0  | 0  | OUT: 0 |  |
| 501 |    |                         |    |    |        |  |
|     | 0  | Unknown                 | 0  | 0  | IN: 1  |  |

|     |   |                     |    |    |        |  |
|-----|---|---------------------|----|----|--------|--|
| 502 |   |                     |    |    |        |  |
|     | 0 | CytoplasmicMembrane | 1  | 0  | IN: 6  |  |
| 503 |   |                     |    |    |        |  |
|     | 0 | Cytoplasmic         | 0  | 0  | OUT: 0 |  |
| 496 |   |                     |    |    |        |  |
|     | 0 | Cytoplasmic         | 5  | 3  | OUT: 0 |  |
| 497 |   |                     |    |    |        |  |
|     | 0 | Unknown             | 0  | 0  | OUT: 0 |  |
| 498 |   |                     |    |    |        |  |
|     | 0 | Cytoplasmic         | 1  | 1  | OUT: 0 |  |
| 499 |   |                     |    |    |        |  |
|     | 0 | CytoplasmicMembrane | 22 | 13 | OUT: 0 |  |
| 493 |   |                     |    |    |        |  |
|     | 0 | Unknown             | 1  | 0  | IN: 1  |  |
| 492 |   |                     |    |    |        |  |
|     | 0 | Cytoplasmic         | 1  | 0  | IN: 0  |  |
| 495 |   |                     |    |    |        |  |
|     | 2 | Cytoplasmic         | 4  | 0  | OUT: 0 |  |
| 494 |   |                     |    |    |        |  |
|     |   |                     |    |    |        |  |

|     |   |             |    |   |        |  |
|-----|---|-------------|----|---|--------|--|
|     | 0 | Unknown     | 0  | 0 | IN: 1  |  |
| 489 |   |             |    |   |        |  |
|     | 0 | Cytoplasmic | 6  | 6 | OUT: 0 |  |
| 488 |   |             |    |   |        |  |
|     | 0 | Cytoplasmic | 1  | 0 | OUT: 0 |  |
| 491 |   |             |    |   |        |  |
|     | 0 | Cytoplasmic | 0  | 0 | IN: 0  |  |
| 490 |   |             |    |   |        |  |
|     | 0 | Cytoplasmic | 2  | 0 | OUT: 0 |  |
| 485 |   |             |    |   |        |  |
|     | 0 | Unknown     | 0  | 0 | OUT: 0 |  |
| 484 |   |             |    |   |        |  |
|     | 0 | Unknown     | 0  | 0 | IN: 0  |  |
| 487 |   |             |    |   |        |  |
|     | 0 | Cytoplasmic | 12 | 0 | OUT: 2 |  |
| 486 |   |             |    |   |        |  |
|     | 0 | Cytoplasmic | 0  | 4 | OUT: 0 |  |
| 481 |   |             |    |   |        |  |
|     | 0 | Unknown     | 0  | 1 | OUT: 0 |  |
| 480 |   |             |    |   |        |  |
|     |   |             |    |   |        |  |

|     |   |                         |    |    |        |  |
|-----|---|-------------------------|----|----|--------|--|
|     | 0 | Unknown                 | 1  | 0  | OUT: 0 |  |
| 483 |   |                         |    |    |        |  |
|     | 0 | Cytoplasmic             | 19 | 0  | OUT: 3 |  |
| 482 |   |                         |    |    |        |  |
|     | 0 | CytoplasmicMem<br>brane | 0  | 0  | OUT: 7 |  |
| 550 |   |                         |    |    |        |  |
|     | 0 | Cytoplasmic             | 0  | 0  | OUT: 0 |  |
| 551 |   |                         |    |    |        |  |
|     | 0 | Unknown                 | 0  | 0  | OUT: 0 |  |
| 548 |   |                         |    |    |        |  |
|     | 0 | CytoplasmicMem<br>brane | 1  | 0  | IN: 10 |  |
| 549 |   |                         |    |    |        |  |
|     | 0 | Cytoplasmic             | 25 | 0  | IN: 0  |  |
| 546 |   |                         |    |    |        |  |
|     | 0 | Unknown                 | 0  | 0  | OUT: 0 |  |
| 547 |   |                         |    |    |        |  |
|     | 0 | CytoplasmicMem<br>brane | 4  | 21 | IN: 6  |  |
| 544 |   |                         |    |    |        |  |
|     |   |                         |    |    |        |  |

|     |     |                         |   |   |        |  |
|-----|-----|-------------------------|---|---|--------|--|
|     | 0   | CytoplasmicMem<br>brane | 0 | 0 | IN: 5  |  |
| 545 |     |                         |   |   |        |  |
|     | 0   | Unknown                 | 0 | 0 | OUT: 1 |  |
| 558 |     |                         |   |   |        |  |
|     | 0   | Cytoplasmic             | 4 | 0 | OUT: 0 |  |
| 559 |     |                         |   |   |        |  |
|     | 0   | Cytoplasmic             | 0 | 0 | OUT: 0 |  |
| 556 |     |                         |   |   |        |  |
|     | 0   | CytoplasmicMem<br>brane | 0 | 0 | OUT: 2 |  |
| 557 |     |                         |   |   |        |  |
|     | 0   | Unknown                 | 0 | 0 | OUT: 3 |  |
| 554 |     |                         |   |   |        |  |
|     | 250 | CytoplasmicMem<br>brane | 5 | 0 | OUT: 8 |  |
| 555 |     |                         |   |   |        |  |
|     | 13  | Cytoplasmic             | 2 | 0 | OUT: 0 |  |
| 552 |     |                         |   |   |        |  |
|     | 0   | Cytoplasmic             | 0 | 0 | OUT: 0 |  |
| 553 |     |                         |   |   |        |  |
|     |     |                         |   |   |        |  |

|     |   |                     |   |    |         |  |
|-----|---|---------------------|---|----|---------|--|
|     | 0 | Unknown             | 1 | 1  | OUT: 0  |  |
| 567 |   |                     |   |    |         |  |
|     | 0 | Unknown             | 0 | 0  | OUT: 1  |  |
| 566 |   |                     |   |    |         |  |
|     | 0 | CytoplasmicMembrane | 1 | 0  | IN: 12  |  |
| 565 |   |                     |   |    |         |  |
|     | 0 | Cytoplasmic         | 2 | 0  | OUT: 0  |  |
| 564 |   |                     |   |    |         |  |
|     | 0 | Cytoplasmic         | 0 | 0  | OUT: 0  |  |
| 563 |   |                     |   |    |         |  |
|     | 0 | Unknown             | 0 | 0  | IN: 1   |  |
| 562 |   |                     |   |    |         |  |
|     | 0 | CytoplasmicMembrane | 1 | 16 | OUT: 11 |  |
| 561 |   |                     |   |    |         |  |
|     | 0 | Cytoplasmic         | 1 | 0  | OUT: 0  |  |
| 560 |   |                     |   |    |         |  |
|     | 0 | Unknown             | 1 | 0  | OUT: 0  |  |
| 575 |   |                     |   |    |         |  |
|     | 0 | Cytoplasmic         | 0 | 0  | OUT: 1  |  |



|     |   |                     |    |    |        |   |
|-----|---|---------------------|----|----|--------|---|
| 574 |   |                     |    |    |        |   |
|     | 0 | CytoplasmicMembrane | 1  | 0  | IN: 14 |   |
| 573 |   |                     |    |    |        |   |
|     | 0 | OuterMembrane       | 0  | 15 | OUT: 0 |   |
| 572 |   |                     |    |    |        |   |
|     | 0 | CytoplasmicMembrane | 12 | 0  | IN: 12 |   |
| 571 |   |                     |    |    |        |   |
|     | 0 | Cytoplasmic         | 2  | 0  | OUT: 0 |   |
| 570 |   |                     |    |    |        |   |
|     | 0 | Unknown             | 0  | 0  | IN: 1  |   |
| 569 |   |                     |    |    |        |   |
|     | 0 | CytoplasmicMembrane | 0  | 0  | OUT: 4 |   |
| 568 |   |                     |    |    |        |   |
|     | 0 | Unknown             | 0  | 0  | OUT: 0 |   |
| 516 |   |                     |    |    |        |   |
|     | 0 | Periplasmic         | 0  | 0  | IN: 2  |   |
| 517 |   |                     |    |    |        |   |
|     | 0 | Cytoplasmic         | 0  | 0  | OUT: 0 |   |
|     | . | .                   | .  | .  | .      | . |

|     |   |                         |    |    |        |  |
|-----|---|-------------------------|----|----|--------|--|
| 518 | 0 | Cytoplasmic             | 26 | 0  | OUT: 0 |  |
| 519 |   |                         |    |    |        |  |
|     | 0 | Cytoplasmic             | 0  | 0  | OUT: 0 |  |
| 512 |   |                         |    |    |        |  |
|     | 0 | Cytoplasmic             | 0  | 0  | OUT: 0 |  |
| 513 |   |                         |    |    |        |  |
|     | 0 | Cytoplasmic             | 1  | 0  | IN: 0  |  |
| 514 |   |                         |    |    |        |  |
|     | 9 | Periplasmic             | 4  | 8  | OUT: 0 |  |
| 515 |   |                         |    |    |        |  |
|     | 0 | Cytoplasmic             | 0  | 0  | OUT: 0 |  |
| 524 |   |                         |    |    |        |  |
|     | 0 | Unknown                 | 0  | 0  | OUT: 0 |  |
| 525 |   |                         |    |    |        |  |
|     | 0 | Cytoplasmic             | 1  | 0  | OUT: 0 |  |
| 526 |   |                         |    |    |        |  |
|     | 0 | Cytoplasmic             | 0  | 2  | OUT: 0 |  |
| 527 |   |                         |    |    |        |  |
|     | 0 | CytoplasmicMem<br>brane | 17 | 55 | OUT: 0 |  |
| 520 |   |                         |    |    |        |  |

|     |   |                     |   |    |         |  |
|-----|---|---------------------|---|----|---------|--|
|     | 0 | CytoplasmicMembrane | 1 | 0  | IN: 5   |  |
| 521 |   |                     |   |    |         |  |
|     | 0 | CytoplasmicMembrane | 0 | 0  | IN: 6   |  |
| 522 |   |                     |   |    |         |  |
|     | 0 | Cytoplasmic         | 0 | 0  | OUT: 0  |  |
| 523 |   |                     |   |    |         |  |
|     | 6 | CytoplasmicMembrane | 2 | 0  | OUT: 12 |  |
| 533 |   |                     |   |    |         |  |
|     | 0 | Cytoplasmic         | 1 | 14 | OUT: 0  |  |
| 532 |   |                     |   |    |         |  |
|     | 0 | CytoplasmicMembrane | 0 | 0  | IN: 1   |  |
| 535 |   |                     |   |    |         |  |
|     | 0 | OuterMembrane       | 0 | 0  | IN: 3   |  |
| 534 |   |                     |   |    |         |  |
|     | 0 | Extracellular       | 2 | 3  | IN: 1   |  |
| 529 |   |                     |   |    |         |  |
|     | 0 | Cytoplasmic         | 0 | 0  | OUT: 0  |  |
| 528 |   |                     |   |    |         |  |

|     |     |                         |    |   |        |  |
|-----|-----|-------------------------|----|---|--------|--|
|     | 0   | Unknown                 | 0  | 0 | IN: 2  |  |
| 531 |     |                         |    |   |        |  |
|     | 0   | Cytoplasmic             | 0  | 0 | OUT: 0 |  |
| 530 |     |                         |    |   |        |  |
|     | 0   | Unknown                 | 0  | 0 | OUT: 0 |  |
| 541 |     |                         |    |   |        |  |
|     | 5   | Cytoplasmic             | 8  | 0 | OUT: 2 |  |
| 540 |     |                         |    |   |        |  |
|     | 0   | Cytoplasmic             | 0  | 0 | OUT: 2 |  |
| 543 |     |                         |    |   |        |  |
|     | 0   | Cytoplasmic             | 12 | 0 | OUT: 0 |  |
| 542 |     |                         |    |   |        |  |
|     | 0   | Unknown                 | 0  | 3 | IN: 1  |  |
| 537 |     |                         |    |   |        |  |
|     | 0   | Cytoplasmic             | 0  | 0 | OUT: 0 |  |
| 536 |     |                         |    |   |        |  |
|     | 0   | CytoplasmicMem<br>brane | 0  | 0 | OUT: 3 |  |
| 539 |     |                         |    |   |        |  |
|     | 250 | CytoplasmicMem<br>brane | 1  | 0 | OUT: 9 |  |

|     |   |                     |    |   |        |  |
|-----|---|---------------------|----|---|--------|--|
| 538 |   |                     |    |   |        |  |
|     | 0 | CytoplasmicMembrane | 0  | 0 | IN: 2  |  |
| 610 |   |                     |    |   |        |  |
|     | 0 | Cytoplasmic         | 1  | 0 | IN: 0  |  |
| 611 |   |                     |    |   |        |  |
|     | 0 | Cytoplasmic         | 14 | 2 | IN: 0  |  |
| 608 |   |                     |    |   |        |  |
|     | 0 | Unknown             | 1  | 0 | IN: 1  |  |
| 609 |   |                     |    |   |        |  |
|     | 0 | Cytoplasmic         | 0  | 1 | OUT: 0 |  |
| 614 |   |                     |    |   |        |  |
|     | 0 | Unknown             | 0  | 0 | IN: 1  |  |
| 615 |   |                     |    |   |        |  |
|     | 0 | CytoplasmicMembrane | 1  | 0 | OUT: 0 |  |
| 612 |   |                     |    |   |        |  |
|     | 0 | Unknown             | 0  | 0 | IN: 0  |  |
| 613 |   |                     |    |   |        |  |
|     | 0 | Cytoplasmic         | 0  | 0 | OUT: 0 |  |
| 618 |   |                     |    |   |        |  |
|     |   |                     |    |   |        |  |

|     |   |                         |    |   |        |  |
|-----|---|-------------------------|----|---|--------|--|
|     | 0 | Cytoplasmic             | 7  | 4 | OUT: 0 |  |
| 619 |   |                         |    |   |        |  |
|     | 0 | Unknown                 | 0  | 0 | IN: 1  |  |
| 616 |   |                         |    |   |        |  |
|     | 0 | CytoplasmicMem<br>brane | 0  | 0 | IN: 12 |  |
| 617 |   |                         |    |   |        |  |
|     | 0 | Cytoplasmic             | 1  | 0 | OUT: 0 |  |
| 622 |   |                         |    |   |        |  |
|     | 0 | Cytoplasmic             | 0  | 2 | OUT: 0 |  |
| 623 |   |                         |    |   |        |  |
|     | 0 | CytoplasmicMem<br>brane | 14 | 0 | OUT: 0 |  |
| 620 |   |                         |    |   |        |  |
|     | 0 | Cytoplasmic             | 0  | 0 | OUT: 0 |  |
| 621 |   |                         |    |   |        |  |
|     | 0 | CytoplasmicMem<br>brane | 1  | 0 | IN: 5  |  |
| 627 |   |                         |    |   |        |  |
|     | 0 | CytoplasmicMem<br>brane | 1  | 0 | IN: 5  |  |
| 626 |   |                         |    |   |        |  |

|     |   |                         |    |   |        |  |
|-----|---|-------------------------|----|---|--------|--|
|     | 0 | CytoplasmicMem<br>brane | 2  | 0 | OUT: 0 |  |
| 625 |   |                         |    |   |        |  |
|     | 0 | Unknown                 | 0  | 0 | IN: 1  |  |
| 624 |   |                         |    |   |        |  |
|     | 7 | Cytoplasmic             | 12 | 0 | OUT: 0 |  |
| 631 |   |                         |    |   |        |  |
|     | 0 | Cytoplasmic             | 1  | 0 | OUT: 0 |  |
| 630 |   |                         |    |   |        |  |
|     | 0 | Cytoplasmic             | 0  | 0 | OUT: 0 |  |
| 629 |   |                         |    |   |        |  |
|     | 0 | CytoplasmicMem<br>brane | 0  | 0 | IN: 2  |  |
| 628 |   |                         |    |   |        |  |
|     | 0 | Cytoplasmic             | 0  | 0 | OUT: 0 |  |
| 635 |   |                         |    |   |        |  |
|     | 0 | OuterMembrane           | 1  | 0 | OUT: 0 |  |
| 634 |   |                         |    |   |        |  |
|     | 0 | Unknown                 | 0  | 0 | IN: 0  |  |
| 633 |   |                         |    |   |        |  |
|     | 0 | CytoplasmicMem          | 0  | 0 | OUT: 3 |  |

|     |   | brane       |   |   |        |  |
|-----|---|-------------|---|---|--------|--|
| 632 |   |             |   |   |        |  |
|     | 0 | Cytoplasmic | 0 | 0 | OUT: 0 |  |
| 639 |   |             |   |   |        |  |
|     | 0 | Cytoplasmic | 0 | 0 | OUT: 0 |  |
| 638 |   |             |   |   |        |  |
|     | 0 | Unknown     | 0 | 0 | OUT: 0 |  |
| 637 |   |             |   |   |        |  |
|     | 0 | Cytoplasmic | 1 | 0 | OUT: 0 |  |
| 636 |   |             |   |   |        |  |
|     | 0 | Unknown     | 0 | 0 | OUT: 1 |  |
| 576 |   |             |   |   |        |  |
|     | 0 | Cytoplasmic | 0 | 0 | OUT: 0 |  |
| 577 |   |             |   |   |        |  |
|     | 0 | Cytoplasmic | 1 | 0 | OUT: 0 |  |
| 578 |   |             |   |   |        |  |
|     | 0 | Unknown     | 0 | 3 | IN: 1  |  |
| 579 |   |             |   |   |        |  |
|     | 0 | Unknown     | 0 | 0 | OUT: 0 |  |
| 580 |   |             |   |   |        |  |
|     |   |             |   |   |        |  |



|     |    |                     |    |    |        |  |
|-----|----|---------------------|----|----|--------|--|
|     | 0  | CytoplasmicMembrane | 0  | 0  | IN: 10 |  |
| 581 |    |                     |    |    |        |  |
|     | 0  | Cytoplasmic         | 0  | 0  | OUT: 0 |  |
| 582 |    |                     |    |    |        |  |
|     | 0  | Extracellular       | 0  | 14 | IN: 1  |  |
| 583 |    |                     |    |    |        |  |
|     | 0  | Cytoplasmic         | 1  | 0  | OUT: 0 |  |
| 584 |    |                     |    |    |        |  |
|     | 0  | Periplasmic         | 0  | 3  | OUT: 0 |  |
| 585 |    |                     |    |    |        |  |
|     | 0  | Cytoplasmic         | 0  | 0  | OUT: 0 |  |
| 586 |    |                     |    |    |        |  |
|     | 0  | Unknown             | 2  | 0  | OUT: 1 |  |
| 587 |    |                     |    |    |        |  |
|     | 0  | Cytoplasmic         | 0  | 0  | IN: 0  |  |
| 588 |    |                     |    |    |        |  |
|     | 0  | Cytoplasmic         | 0  | 0  | OUT: 0 |  |
| 589 |    |                     |    |    |        |  |
|     | 10 | Cytoplasmic         | 23 | 1  | OUT: 0 |  |
| 590 |    |                     |    |    |        |  |

|     |    |                     |    |   |        |  |
|-----|----|---------------------|----|---|--------|--|
|     | 0  | CytoplasmicMembrane | 0  | 0 | OUT: 4 |  |
| 591 |    |                     |    |   |        |  |
|     | 0  | Unknown             | 1  | 0 | OUT: 0 |  |
| 593 |    |                     |    |   |        |  |
|     | 0  | Cytoplasmic         | 1  | 0 | OUT: 0 |  |
| 592 |    |                     |    |   |        |  |
|     | 0  | Cytoplasmic         | 24 | 0 | OUT: 0 |  |
| 595 |    |                     |    |   |        |  |
|     | 0  | Unknown             | 1  | 0 | IN: 1  |  |
| 594 |    |                     |    |   |        |  |
|     | 0  | Unknown             | 0  | 0 | IN: 0  |  |
| 597 |    |                     |    |   |        |  |
|     | 0  | Cytoplasmic         | 1  | 0 | OUT: 0 |  |
| 596 |    |                     |    |   |        |  |
|     | 0  | Unknown             | 0  | 0 | IN: 0  |  |
| 599 |    |                     |    |   |        |  |
|     | 0  | Unknown             | 96 | 8 | OUT: 0 |  |
| 598 |    |                     |    |   |        |  |
|     | 37 | Cytoplasmic         | 1  | 3 | OUT: 1 |  |
| 601 |    |                     |    |   |        |  |

|     |   |                         |   |   |        |  |
|-----|---|-------------------------|---|---|--------|--|
|     | 0 | Unknown                 | 0 | 0 | OUT: 0 |  |
| 600 |   |                         |   |   |        |  |
|     | 0 | Unknown                 | 0 | 0 | OUT: 0 |  |
| 603 |   |                         |   |   |        |  |
|     | 0 | Cytoplasmic             | 1 | 0 | OUT: 0 |  |
| 602 |   |                         |   |   |        |  |
|     | 0 | Extracellular           | 0 | 2 | IN: 1  |  |
| 605 |   |                         |   |   |        |  |
|     | 0 | Cytoplasmic             | 1 | 0 | IN: 0  |  |
| 604 |   |                         |   |   |        |  |
|     | 0 | Unknown                 | 0 | 0 | IN: 1  |  |
| 607 |   |                         |   |   |        |  |
|     | 0 | Cytoplasmic             | 1 | 0 | IN: 0  |  |
| 606 |   |                         |   |   |        |  |
|     | 0 | Unknown                 | 1 | 0 | IN: 0  |  |
| 687 |   |                         |   |   |        |  |
|     | 0 | Cytoplasmic             | 0 | 0 | IN: 1  |  |
| 686 |   |                         |   |   |        |  |
|     | 0 | CytoplasmicMem<br>brane | 1 | 0 | IN: 2  |  |
| 685 |   |                         |   |   |        |  |

|     |   |             |    |   |        |  |
|-----|---|-------------|----|---|--------|--|
|     | 7 | Cytoplasmic | 26 | 0 | OUT: 0 |  |
| 684 |   |             |    |   |        |  |
|     | 0 | Unknown     | 0  | 0 | OUT: 0 |  |
| 683 |   |             |    |   |        |  |
|     | 0 | Cytoplasmic | 0  | 0 | OUT: 0 |  |
| 682 |   |             |    |   |        |  |
|     | 0 | Unknown     | 0  | 0 | IN: 1  |  |
| 681 |   |             |    |   |        |  |
|     | 0 | Cytoplasmic | 0  | 0 | OUT: 0 |  |
| 680 |   |             |    |   |        |  |
|     | 0 | Cytoplasmic | 0  | 0 | OUT: 0 |  |
| 679 |   |             |    |   |        |  |
|     | 0 | Cytoplasmic | 0  | 0 | OUT: 0 |  |
| 678 |   |             |    |   |        |  |
|     | 0 | Cytoplasmic | 12 | 0 | IN: 0  |  |
| 677 |   |             |    |   |        |  |
|     | 0 | Cytoplasmic | 4  | 0 | OUT: 2 |  |
| 676 |   |             |    |   |        |  |
|     | 0 | Cytoplasmic | 0  | 0 | IN: 1  |  |
| 675 |   |             |    |   |        |  |
|     |   |             |    |   |        |  |

|     |   |                     |   |   |        |  |
|-----|---|---------------------|---|---|--------|--|
|     | 0 | Cytoplasmic         | 0 | 0 | OUT: 1 |  |
| 674 |   |                     |   |   |        |  |
|     | 0 | Cytoplasmic         | 4 | 0 | OUT: 0 |  |
| 673 |   |                     |   |   |        |  |
|     | 0 | Cytoplasmic         | 0 | 3 | OUT: 0 |  |
| 672 |   |                     |   |   |        |  |
|     | 0 | CytoplasmicMembrane | 0 | 0 | OUT: 6 |  |
| 702 |   |                     |   |   |        |  |
|     | 0 | Unknown             | 0 | 3 | OUT: 1 |  |
| 703 |   |                     |   |   |        |  |
|     | 0 | CytoplasmicMembrane | 0 | 0 | IN: 11 |  |
| 700 |   |                     |   |   |        |  |
|     | 0 | CytoplasmicMembrane | 0 | 3 | IN: 2  |  |
| 701 |   |                     |   |   |        |  |
|     | 0 | Cytoplasmic         | 1 | 0 | OUT: 0 |  |
| 698 |   |                     |   |   |        |  |
|     | 0 | Unknown             | 0 | 0 | OUT: 0 |  |
| 699 |   |                     |   |   |        |  |
|     |   |                     |   |   |        |  |

|     |                                                                                     |                                                                                     |                                                                                       |                                                                                       |                                                                                       |                                                                                       |
|-----|-------------------------------------------------------------------------------------|-------------------------------------------------------------------------------------|---------------------------------------------------------------------------------------|---------------------------------------------------------------------------------------|---------------------------------------------------------------------------------------|---------------------------------------------------------------------------------------|
|     | 0                                                                                   | Cytoplasmic                                                                         | 0                                                                                     | 0                                                                                     | OUT: 0                                                                                |                                                                                       |
| 696 |    |    |    |    |    |    |
|     | 2                                                                                   | Cytoplasmic                                                                         | 5                                                                                     | 0                                                                                     | IN: 1                                                                                 |                                                                                       |
| 697 |    |    |    |    |    |    |
|     | 0                                                                                   | CytoplasmicMembrane                                                                 | 0                                                                                     | 18                                                                                    | IN: 7                                                                                 |                                                                                       |
| 694 |    |    |    |    |    |    |
|     | 0                                                                                   | Extracellular                                                                       | 0                                                                                     | 14                                                                                    | OUT: 0                                                                                |                                                                                       |
| 695 |    |    |    |    |    |    |
|     | 0                                                                                   | Cytoplasmic                                                                         | 2                                                                                     | 0                                                                                     | OUT: 0                                                                                |                                                                                       |
| 692 |    |    |    |    |    |    |
|     | 0                                                                                   | Cytoplasmic                                                                         | 3                                                                                     | 11                                                                                    | IN: 0                                                                                 |                                                                                       |
| 693 |    |    |    |    |    |    |
|     | 0                                                                                   | Unknown                                                                             | 0                                                                                     | 0                                                                                     | OUT: 0                                                                                |                                                                                       |
| 690 |  |  |  |  |  |  |
|     | 0                                                                                   | OuterMembrane                                                                       | 0                                                                                     | 0                                                                                     | OUT: 0                                                                                |                                                                                       |
| 691 |  |  |  |  |  |  |
|     | 0                                                                                   | Cytoplasmic                                                                         | 0                                                                                     | 0                                                                                     | OUT: 0                                                                                |                                                                                       |
| 688 |  |  |  |  |  |  |
|     | 0                                                                                   | CytoplasmicMembrane                                                                 | 44                                                                                    | 48                                                                                    | OUT: 0                                                                                |                                                                                       |

|     |    |                     |    |   |        |  |
|-----|----|---------------------|----|---|--------|--|
| 689 |    |                     |    |   |        |  |
|     | 0  | Unknown             | 0  | 0 | OUT: 0 |  |
| 653 |    |                     |    |   |        |  |
|     | 0  | Cytoplasmic         | 1  | 0 | OUT: 0 |  |
| 652 |    |                     |    |   |        |  |
|     | 8  | Cytoplasmic         | 18 | 0 | OUT: 0 |  |
| 655 |    |                     |    |   |        |  |
|     | 0  | Unknown             | 0  | 0 | OUT: 0 |  |
| 654 |    |                     |    |   |        |  |
|     | 0  | Cytoplasmic         | 2  | 0 | IN: 0  |  |
| 649 |    |                     |    |   |        |  |
|     | 0  | CytoplasmicMembrane | 0  | 1 | IN: 0  |  |
| 648 |    |                     |    |   |        |  |
|     | 0  | Cytoplasmic         | 0  | 0 | IN: 1  |  |
| 651 |    |                     |    |   |        |  |
|     | 18 | Cytoplasmic         | 23 | 3 | IN: 0  |  |
| 650 |    |                     |    |   |        |  |
|     | 0  | OuterMembrane       | 0  | 1 | OUT: 0 |  |
| 645 |    |                     |    |   |        |  |
|     | 0  | Cytoplasmic         | 1  | 0 | OUT: 1 |  |

|     |    |                         |    |   |        |  |
|-----|----|-------------------------|----|---|--------|--|
| 644 |    |                         |    |   |        |  |
|     | 0  | Cytoplasmic             | 0  | 0 | IN: 0  |  |
| 647 |    |                         |    |   |        |  |
|     | 0  | Unknown                 | 0  | 0 | IN: 1  |  |
| 646 |    |                         |    |   |        |  |
|     | 0  | Cytoplasmic             | 0  | 0 | OUT: 0 |  |
| 641 |    |                         |    |   |        |  |
|     | 0  | CytoplasmicMem<br>brane | 0  | 0 | OUT: 0 |  |
| 640 |    |                         |    |   |        |  |
|     | 0  | Cytoplasmic             | 18 | 0 | OUT: 0 |  |
| 643 |    |                         |    |   |        |  |
|     | 0  | Cytoplasmic             | 2  | 0 | OUT: 0 |  |
| 642 |    |                         |    |   |        |  |
|     | 0  | CytoplasmicMem<br>brane | 0  | 0 | IN: 4  |  |
| 668 |    |                         |    |   |        |  |
|     | 0  | Cytoplasmic             | 3  | 0 | OUT: 0 |  |
| 669 |    |                         |    |   |        |  |
|     | 18 | Cytoplasmic             | 24 | 0 | OUT: 0 |  |
| 670 |    |                         |    |   |        |  |
|     |    |                         |    |   |        |  |



|     |   |             |   |   |        |  |
|-----|---|-------------|---|---|--------|--|
|     | 0 | Cytoplasmic | 0 | 0 | OUT: 0 |  |
| 671 |   |             |   |   |        |  |
|     | 0 | Cytoplasmic | 0 | 0 | IN: 1  |  |
| 664 |   |             |   |   |        |  |
|     | 0 | Cytoplasmic | 0 | 0 | OUT: 0 |  |
| 665 |   |             |   |   |        |  |
|     | 0 | Unknown     | 0 | 0 | OUT: 1 |  |
| 666 |   |             |   |   |        |  |
|     | 0 | Cytoplasmic | 1 | 0 | OUT: 0 |  |
| 667 |   |             |   |   |        |  |
|     | 0 | Unknown     | 0 | 0 | IN: 1  |  |
| 660 |   |             |   |   |        |  |
|     | 0 | Unknown     | 1 | 0 | IN: 1  |  |
| 661 |   |             |   |   |        |  |
|     | 0 | Cytoplasmic | 0 | 0 | OUT: 0 |  |
| 662 |   |             |   |   |        |  |
|     | 0 | Unknown     | 0 | 0 | IN: 3  |  |
| 663 |   |             |   |   |        |  |
|     | 0 | Cytoplasmic | 0 | 0 | OUT: 0 |  |
| 656 |   |             |   |   |        |  |
|     |   |             |   |   |        |  |

|     |                                                                                     |                                                                                     |                                                                                       |                                                                                       |                                                                                       |                                                                                       |
|-----|-------------------------------------------------------------------------------------|-------------------------------------------------------------------------------------|---------------------------------------------------------------------------------------|---------------------------------------------------------------------------------------|---------------------------------------------------------------------------------------|---------------------------------------------------------------------------------------|
|     | 0                                                                                   | CytoplasmicMembrane                                                                 | 0                                                                                     | 0                                                                                     | IN: 11                                                                                |                                                                                       |
| 657 |    |    |    |    |    |    |
|     | 15                                                                                  | Cytoplasmic                                                                         | 17                                                                                    | 0                                                                                     | OUT: 0                                                                                |                                                                                       |
| 658 |    |    |    |    |    |    |
|     | 0                                                                                   | Unknown                                                                             | 0                                                                                     | 0                                                                                     | OUT: 0                                                                                |                                                                                       |
| 659 |    |    |    |    |    |    |
|     | 0                                                                                   | Cytoplasmic                                                                         | 0                                                                                     | 0                                                                                     | OUT: 0                                                                                |                                                                                       |
| 747 |    |    |    |    |    |    |
|     | 0                                                                                   | Cytoplasmic                                                                         | 6                                                                                     | 0                                                                                     | OUT: 0                                                                                |                                                                                       |
| 746 |    |    |    |    |    |    |
|     | 0                                                                                   | Cytoplasmic                                                                         | 0                                                                                     | 3                                                                                     | OUT: 0                                                                                |                                                                                       |
| 745 |    |    |    |    |    |    |
|     | 0                                                                                   | Cytoplasmic                                                                         | 1                                                                                     | 0                                                                                     | OUT: 0                                                                                |                                                                                       |
| 744 |  |  |  |  |  |  |
|     | 0                                                                                   | Cytoplasmic                                                                         | 0                                                                                     | 0                                                                                     | OUT: 0                                                                                |                                                                                       |
| 751 |  |  |  |  |  |  |
|     | 0                                                                                   | OuterMembrane                                                                       | 0                                                                                     | 15                                                                                    | IN: 1                                                                                 |                                                                                       |
| 750 |  |  |  |  |  |  |
|     | 0                                                                                   | Unknown                                                                             | 0                                                                                     | 0                                                                                     | IN: 1                                                                                 |                                                                                       |
| 749 |  |  |  |  |  |  |

|     |   |             |    |    |        |  |
|-----|---|-------------|----|----|--------|--|
|     | 0 | Cytoplasmic | 16 | 0  | OUT: 0 |  |
| 748 |   |             |    |    |        |  |
|     | 0 | Unknown     | 1  | 0  | IN: 0  |  |
| 739 |   |             |    |    |        |  |
|     | 0 | Cytoplasmic | 7  | 0  | OUT: 0 |  |
| 738 |   |             |    |    |        |  |
|     | 0 | Unknown     | 1  | 0  | IN: 0  |  |
| 737 |   |             |    |    |        |  |
|     | 0 | Unknown     | 1  | 0  | OUT: 0 |  |
| 736 |   |             |    |    |        |  |
|     | 0 | Unknown     | 0  | 3  | IN: 1  |  |
| 743 |   |             |    |    |        |  |
|     | 0 | Cytoplasmic | 18 | 0  | OUT: 0 |  |
| 742 |   |             |    |    |        |  |
|     | 0 | Unknown     | 0  | 0  | IN: 0  |  |
| 741 |   |             |    |    |        |  |
|     | 0 | Unknown     | 0  | 10 | OUT: 0 |  |
| 740 |   |             |    |    |        |  |
|     | 0 | Cytoplasmic | 0  | 3  | OUT: 0 |  |
| 762 |   |             |    |    |        |  |
|     |   |             |    |    |        |  |

|     |    |                         |    |    |        |  |
|-----|----|-------------------------|----|----|--------|--|
|     | 0  | Cytoplasmic             | 0  | 0  | OUT: 0 |  |
| 763 |    |                         |    |    |        |  |
|     | 0  | Cytoplasmic             | 1  | 0  | OUT: 0 |  |
| 760 |    |                         |    |    |        |  |
|     | 0  | Unknown                 | 0  | 0  | OUT: 0 |  |
| 766 |    |                         |    |    |        |  |
|     | 0  | Unknown                 | 1  | 0  | OUT: 0 |  |
| 767 |    |                         |    |    |        |  |
|     | 0  | Cytoplasmic             | 0  | 0  | OUT: 2 |  |
| 764 |    |                         |    |    |        |  |
|     | 54 | Cytoplasmic             | 13 | 0  | OUT: 0 |  |
| 765 |    |                         |    |    |        |  |
|     | 0  | CytoplasmicMem<br>brane | 0  | 1  | OUT: 9 |  |
| 754 |    |                         |    |    |        |  |
|     | 0  | CytoplasmicMem<br>brane | 0  | 6  | OUT: 0 |  |
| 755 |    |                         |    |    |        |  |
|     | 0  | CytoplasmicMem<br>brane | 0  | 18 | IN: 4  |  |
| 752 |    |                         |    |    |        |  |
|     |    |                         |    |    |        |  |

|     |    |                         |    |   |        |  |
|-----|----|-------------------------|----|---|--------|--|
|     | 0  | Cytoplasmic             | 12 | 0 | IN: 0  |  |
| 753 |    |                         |    |   |        |  |
|     | 0  | Cytoplasmic             | 0  | 0 | OUT: 0 |  |
| 758 |    |                         |    |   |        |  |
|     | 0  | Cytoplasmic             | 0  | 0 | OUT: 0 |  |
| 759 |    |                         |    |   |        |  |
|     | 0  | Unknown                 | 0  | 0 | OUT: 0 |  |
| 756 |    |                         |    |   |        |  |
|     | 32 | Cytoplasmic             | 19 | 0 | IN: 1  |  |
| 757 |    |                         |    |   |        |  |
|     | 0  | CytoplasmicMem<br>brane | 2  | 0 | OUT: 7 |  |
| 713 |    |                         |    |   |        |  |
|     | 0  | Unknown                 | 0  | 0 | IN: 1  |  |
| 712 |    |                         |    |   |        |  |
|     | 0  | Cytoplasmic             | 0  | 2 | OUT: 0 |  |
| 715 |    |                         |    |   |        |  |
|     | 0  | Cytoplasmic             | 0  | 0 | OUT: 0 |  |
| 714 |    |                         |    |   |        |  |
|     | 11 | CytoplasmicMem<br>brane | 0  | 0 | IN: 15 |  |

|     |   |                         |    |   |        |  |
|-----|---|-------------------------|----|---|--------|--|
| 717 |   |                         |    |   |        |  |
|     | 0 | Unknown                 | 0  | 0 | OUT: 0 |  |
| 716 |   |                         |    |   |        |  |
|     | 0 | Cytoplasmic             | 1  | 0 | OUT: 0 |  |
| 719 |   |                         |    |   |        |  |
|     | 0 | Unknown                 | 0  | 0 | OUT: 0 |  |
| 718 |   |                         |    |   |        |  |
|     | 0 | CytoplasmicMem<br>brane | 13 | 4 | IN: 3  |  |
| 705 |   |                         |    |   |        |  |
|     | 0 | Cytoplasmic             | 0  | 0 | OUT: 0 |  |
| 704 |   |                         |    |   |        |  |
|     | 2 | Cytoplasmic             | 25 | 0 | OUT: 0 |  |
| 707 |   |                         |    |   |        |  |
|     | 0 | Cytoplasmic             | 0  | 0 | OUT: 0 |  |
| 706 |   |                         |    |   |        |  |
|     | 0 | CytoplasmicMem<br>brane | 2  | 0 | OUT: 3 |  |
| 709 |   |                         |    |   |        |  |
|     | 0 | Unknown                 | 1  | 0 | OUT: 0 |  |
| 708 |   |                         |    |   |        |  |
|     |   |                         |    |   |        |  |

|     |   |             |    |   |        |  |
|-----|---|-------------|----|---|--------|--|
|     | 0 | Cytoplasmic | 1  | 0 | OUT: 0 |  |
| 711 |   |             |    |   |        |  |
|     | 0 | Unknown     | 0  | 0 | OUT: 0 |  |
| 710 |   |             |    |   |        |  |
|     | 0 | Unknown     | 1  | 0 | OUT: 0 |  |
| 728 |   |             |    |   |        |  |
|     | 0 | Cytoplasmic | 17 | 0 | OUT: 0 |  |
| 729 |   |             |    |   |        |  |
|     | 0 | Cytoplasmic | 1  | 0 | OUT: 0 |  |
| 730 |   |             |    |   |        |  |
|     | 0 | Cytoplasmic | 17 | 0 | OUT: 0 |  |
| 731 |   |             |    |   |        |  |
|     | 0 | Cytoplasmic | 0  | 0 | OUT: 0 |  |
| 732 |   |             |    |   |        |  |
|     | 0 | Unknown     | 0  | 0 | IN: 0  |  |
| 733 |   |             |    |   |        |  |
|     | 0 | Unknown     | 0  | 0 | OUT: 0 |  |
| 734 |   |             |    |   |        |  |
|     | 0 | Unknown     | 1  | 0 | OUT: 0 |  |
| 735 |   |             |    |   |        |  |
|     |   |             |    |   |        |  |

|     |    |                     |    |    |        |  |
|-----|----|---------------------|----|----|--------|--|
|     | 0  | Unknown             | 0  | 0  | OUT: 0 |  |
| 720 |    |                     |    |    |        |  |
|     | 0  | Cytoplasmic         | 0  | 0  | OUT: 0 |  |
| 721 |    |                     |    |    |        |  |
|     | 0  | CytoplasmicMembrane | 0  | 0  | IN: 6  |  |
| 722 |    |                     |    |    |        |  |
|     | 0  | Cytoplasmic         | 0  | 0  | OUT: 0 |  |
| 723 |    |                     |    |    |        |  |
|     | 0  | Extracellular       | 0  | 2  | IN: 1  |  |
| 724 |    |                     |    |    |        |  |
|     | 24 | Cytoplasmic         | 34 | 0  | IN: 0  |  |
| 725 |    |                     |    |    |        |  |
|     | 0  | OuterMembrane       | 0  | 15 | OUT: 0 |  |
| 726 |    |                     |    |    |        |  |
|     | 0  | Cytoplasmic         | 0  | 1  | OUT: 0 |  |
| 727 |    |                     |    |    |        |  |
|     | 0  | CytoplasmicMembrane | 0  | 1  | OUT: 2 |  |
| 821 |    |                     |    |    |        |  |
|     | 1  | Cytoplasmic         | 7  | 0  | OUT: 0 |  |



|     |                                                                                     |                                                                                     |                                                                                       |                                                                                       |                                                                                       |                                                                                       |
|-----|-------------------------------------------------------------------------------------|-------------------------------------------------------------------------------------|---------------------------------------------------------------------------------------|---------------------------------------------------------------------------------------|---------------------------------------------------------------------------------------|---------------------------------------------------------------------------------------|
| 820 |    |    |    |    |    |    |
|     | 0                                                                                   | CytoplasmicMem<br>brane                                                             | 2                                                                                     | 0                                                                                     | OUT: 1                                                                                |                                                                                       |
| 823 |    |    |    |    |    |    |
|     | 0                                                                                   | Cytoplasmic                                                                         | 0                                                                                     | 0                                                                                     | IN: 1                                                                                 |                                                                                       |
| 822 |    |    |    |    |    |    |
|     | 0                                                                                   | CytoplasmicMem<br>brane                                                             | 0                                                                                     | 0                                                                                     | OUT: 6                                                                                |                                                                                       |
| 817 |    |    |    |    |    |    |
|     | 0                                                                                   | Cytoplasmic                                                                         | 0                                                                                     | 0                                                                                     | OUT: 0                                                                                |                                                                                       |
| 816 |    |    |    |    |    |    |
|     | 0                                                                                   | Cytoplasmic                                                                         | 0                                                                                     | 0                                                                                     | OUT: 0                                                                                |                                                                                       |
| 819 |    |    |    |    |    |    |
|     | 0                                                                                   | Cytoplasmic                                                                         | 2                                                                                     | 0                                                                                     | OUT: 1                                                                                |                                                                                       |
| 818 |  |  |  |  |  |  |
|     | 0                                                                                   | Cytoplasmic                                                                         | 0                                                                                     | 0                                                                                     | OUT: 0                                                                                |                                                                                       |
| 829 |  |  |  |  |  |  |
|     | 0                                                                                   | Cytoplasmic                                                                         | 0                                                                                     | 0                                                                                     | OUT: 0                                                                                |                                                                                       |
| 828 |  |  |  |  |  |  |
|     | 0                                                                                   | Cytoplasmic                                                                         | 1                                                                                     | 0                                                                                     | OUT: 0                                                                                |                                                                                       |
| 831 |  |  |  |  |  |  |
|     |                                                                                     |                                                                                     |                                                                                       |                                                                                       |                                                                                       |                                                                                       |

|     |   |                     |   |   |        |  |
|-----|---|---------------------|---|---|--------|--|
|     | 0 | Cytoplasmic         | 0 | 0 | OUT: 0 |  |
| 830 |   |                     |   |   |        |  |
|     | 0 | Unknown             | 0 | 0 | OUT: 2 |  |
| 825 |   |                     |   |   |        |  |
|     | 0 | OuterMembrane       | 1 | 3 | IN: 1  |  |
| 824 |   |                     |   |   |        |  |
|     | 0 | CytoplasmicMembrane | 0 | 0 | IN: 7  |  |
| 827 |   |                     |   |   |        |  |
|     | 0 | Unknown             | 1 | 0 | IN: 1  |  |
| 826 |   |                     |   |   |        |  |
|     | 5 | Cytoplasmic         | 1 | 0 | OUT: 0 |  |
| 805 |   |                     |   |   |        |  |
|     | 0 | OuterMembrane       | 0 | 0 | IN: 1  |  |
| 806 |   |                     |   |   |        |  |
|     | 1 | Cytoplasmic         | 5 | 0 | OUT: 0 |  |
| 807 |   |                     |   |   |        |  |
|     | 3 | Cytoplasmic         | 7 | 0 | OUT: 0 |  |
| 800 |   |                     |   |   |        |  |
|     | 0 | Cytoplasmic         | 0 | 0 | OUT: 0 |  |
| 801 |   |                     |   |   |        |  |

|     |   |                     |    |   |        |  |
|-----|---|---------------------|----|---|--------|--|
|     | 0 | Unknown             | 0  | 0 | OUT: 0 |  |
| 802 |   |                     |    |   |        |  |
|     | 0 | Cytoplasmic         | 0  | 0 | OUT: 0 |  |
| 803 |   |                     |    |   |        |  |
|     | 0 | Cytoplasmic         | 12 | 0 | OUT: 0 |  |
| 812 |   |                     |    |   |        |  |
|     | 0 | Unknown             | 0  | 0 | IN: 3  |  |
| 813 |   |                     |    |   |        |  |
|     | 0 | CytoplasmicMembrane | 0  | 0 | IN: 5  |  |
| 814 |   |                     |    |   |        |  |
|     | 0 | CytoplasmicMembrane | 1  | 0 | IN: 3  |  |
| 815 |   |                     |    |   |        |  |
|     | 0 | Unknown             | 1  | 0 | OUT: 0 |  |
| 808 |   |                     |    |   |        |  |
|     | 2 | Cytoplasmic         | 1  | 0 | OUT: 0 |  |
| 809 |   |                     |    |   |        |  |
|     | 0 | Cytoplasmic         | 0  | 0 | OUT: 0 |  |
| 810 |   |                     |    |   |        |  |
|     | 0 | Cytoplasmic         | 1  | 0 | OUT: 1 |  |

|     |   |                         |   |    |        |  |
|-----|---|-------------------------|---|----|--------|--|
| 811 |   |                         |   |    |        |  |
|     | 0 | CytoplasmicMem<br>brane | 0 | 1  | OUT: 7 |  |
| 791 |   |                         |   |    |        |  |
|     | 0 | Cytoplasmic             | 2 | 29 | IN: 0  |  |
| 790 |   |                         |   |    |        |  |
|     | 0 | Cytoplasmic             | 0 | 0  | OUT: 0 |  |
| 789 |   |                         |   |    |        |  |
|     | 0 | Cytoplasmic             | 0 | 0  | OUT: 2 |  |
| 788 |   |                         |   |    |        |  |
|     | 0 | Cytoplasmic             | 1 | 0  | IN: 1  |  |
| 787 |   |                         |   |    |        |  |
|     | 0 | Unknown                 | 0 | 0  | OUT: 0 |  |
| 786 |   |                         |   |    |        |  |
|     | 0 | Cytoplasmic             | 0 | 0  | OUT: 0 |  |
| 785 |   |                         |   |    |        |  |
|     | 0 | Cytoplasmic             | 1 | 0  | OUT: 0 |  |
| 784 |   |                         |   |    |        |  |
|     | 0 | Cytoplasmic             | 0 | 0  | OUT: 0 |  |
| 799 |   |                         |   |    |        |  |
|     | 0 | Unknown                 | 0 | 0  | OUT: 0 |  |

|     |   |                     |    |   |        |  |
|-----|---|---------------------|----|---|--------|--|
| 798 |   |                     |    |   |        |  |
|     | 0 | Unknown             | 0  | 1 | IN: 1  |  |
| 797 |   |                     |    |   |        |  |
|     | 0 | CytoplasmicMembrane | 3  | 0 | OUT: 4 |  |
| 796 |   |                     |    |   |        |  |
|     | 0 | Unknown             | 0  | 0 | OUT: 0 |  |
| 795 |   |                     |    |   |        |  |
|     | 0 | Cytoplasmic         | 0  | 0 | OUT: 0 |  |
| 794 |   |                     |    |   |        |  |
|     | 0 | Cytoplasmic         | 1  | 0 | OUT: 0 |  |
| 793 |   |                     |    |   |        |  |
|     | 1 | Cytoplasmic         | 4  | 0 | OUT: 0 |  |
| 792 |   |                     |    |   |        |  |
|     | 0 | Cytoplasmic         | 27 | 2 | OUT: 0 |  |
| 774 |   |                     |    |   |        |  |
|     | 4 | Cytoplasmic         | 11 | 3 | OUT: 1 |  |
| 775 |   |                     |    |   |        |  |
|     | 0 | Cytoplasmic         | 2  | 1 | OUT: 0 |  |
| 772 |   |                     |    |   |        |  |
|     | 0 | CytoplasmicMem      | 1  | 0 | IN: 4  |  |

|     |                                                                                     | brane                                                                               |                                                                                       |                                                                                       |                                                                                       |                                                                                       |
|-----|-------------------------------------------------------------------------------------|-------------------------------------------------------------------------------------|---------------------------------------------------------------------------------------|---------------------------------------------------------------------------------------|---------------------------------------------------------------------------------------|---------------------------------------------------------------------------------------|
| 773 |    |    |    |    |    |    |
|     | 11                                                                                  | Cytoplasmic                                                                         | 27                                                                                    | 0                                                                                     | OUT: 1                                                                                |                                                                                       |
| 770 |    |    |    |    |    |    |
|     | 0                                                                                   | Unknown                                                                             | 0                                                                                     | 0                                                                                     | IN: 1                                                                                 |                                                                                       |
| 771 |    |    |    |    |    |    |
|     | 0                                                                                   | Unknown                                                                             | 0                                                                                     | 0                                                                                     | OUT: 2                                                                                |                                                                                       |
| 768 |    |    |    |    |    |    |
|     | 0                                                                                   | CytoplasmicMembrane                                                                 | 0                                                                                     | 0                                                                                     | OUT: 4                                                                                |                                                                                       |
| 769 |    |    |    |    |    |    |
|     | 0                                                                                   | Unknown                                                                             | 0                                                                                     | 0                                                                                     | OUT: 1                                                                                |                                                                                       |
| 782 |    |    |    |    |    |    |
|     | 0                                                                                   | Cytoplasmic                                                                         | 0                                                                                     | 0                                                                                     | OUT: 0                                                                                |                                                                                       |
| 783 |  |  |  |  |  |  |
|     | 0                                                                                   | Cytoplasmic                                                                         | 1                                                                                     | 0                                                                                     | OUT: 0                                                                                |                                                                                       |
| 780 |  |  |  |  |  |  |
|     | 0                                                                                   | Unknown                                                                             | 2                                                                                     | 0                                                                                     | OUT: 0                                                                                |                                                                                       |
| 781 |  |  |  |  |  |  |
|     | 0                                                                                   | Unknown                                                                             | 1                                                                                     | 0                                                                                     | IN: 1                                                                                 |                                                                                       |
| 778 |  |  |  |  |  |  |

|     |   |                     |    |    |        |  |
|-----|---|---------------------|----|----|--------|--|
|     | 0 | Cytoplasmic         | 7  | 0  | OUT: 0 |  |
| 779 |   |                     |    |    |        |  |
|     | 0 | CytoplasmicMembrane | 22 | 24 | OUT: 0 |  |
| 776 |   |                     |    |    |        |  |
|     | 0 | Cytoplasmic         | 0  | 0  | OUT: 0 |  |
| 777 |   |                     |    |    |        |  |
|     | 0 | CytoplasmicMembrane | 1  | 0  | IN: 4  |  |
| 881 |   |                     |    |    |        |  |
|     | 0 | Unknown             | 1  | 0  | IN: 0  |  |
| 880 |   |                     |    |    |        |  |
|     | 0 | Cytoplasmic         | 3  | 0  | OUT: 0 |  |
| 883 |   |                     |    |    |        |  |
|     | 0 | CytoplasmicMembrane | 1  | 0  | IN: 5  |  |
| 882 |   |                     |    |    |        |  |
|     | 0 | CytoplasmicMembrane | 1  | 0  | IN: 1  |  |
| 885 |   |                     |    |    |        |  |
|     | 1 | Cytoplasmic         | 0  | 0  | OUT: 0 |  |
| 884 |   |                     |    |    |        |  |

|     |   |                     |    |    |        |  |
|-----|---|---------------------|----|----|--------|--|
|     | 0 | Unknown             | 0  | 0  | OUT: 4 |  |
| 887 |   |                     |    |    |        |  |
|     | 0 | Cytoplasmic         | 0  | 9  | OUT: 0 |  |
| 886 |   |                     |    |    |        |  |
|     | 0 | Cytoplasmic         | 0  | 0  | OUT: 0 |  |
| 889 |   |                     |    |    |        |  |
|     | 0 | CytoplasmicMembrane | 15 | 5  | OUT: 0 |  |
| 888 |   |                     |    |    |        |  |
|     | 0 | CytoplasmicMembrane | 0  | 0  | IN: 5  |  |
| 891 |   |                     |    |    |        |  |
|     | 0 | Cytoplasmic         | 15 | 0  | OUT: 0 |  |
| 890 |   |                     |    |    |        |  |
|     | 0 | Unknown             | 1  | 0  | OUT: 0 |  |
| 893 |   |                     |    |    |        |  |
|     | 0 | Cytoplasmic         | 4  | 1  | OUT: 0 |  |
| 892 |   |                     |    |    |        |  |
|     | 0 | Cytoplasmic         | 16 | 39 | OUT: 1 |  |
| 895 |   |                     |    |    |        |  |
|     | 0 | Unknown             | 1  | 3  | OUT: 0 |  |



|     |   |                         |   |   |        |  |
|-----|---|-------------------------|---|---|--------|--|
| 894 |   |                         |   |   |        |  |
|     | 0 | Cytoplasmic             | 0 | 0 | IN: 1  |  |
| 864 |   |                         |   |   |        |  |
|     | 1 | Cytoplasmic             | 3 | 0 | OUT: 0 |  |
| 865 |   |                         |   |   |        |  |
|     | 0 | Cytoplasmic             | 7 | 0 | OUT: 0 |  |
| 866 |   |                         |   |   |        |  |
|     | 0 | Cytoplasmic             | 0 | 0 | OUT: 0 |  |
| 867 |   |                         |   |   |        |  |
|     | 0 | CytoplasmicMem<br>brane | 0 | 0 | IN: 3  |  |
| 868 |   |                         |   |   |        |  |
|     | 0 | CytoplasmicMem<br>brane | 2 | 2 | IN: 6  |  |
| 869 |   |                         |   |   |        |  |
|     | 0 | Unknown                 | 0 | 3 | OUT: 2 |  |
| 870 |   |                         |   |   |        |  |
|     | 0 | Cytoplasmic             | 0 | 0 | IN: 0  |  |
| 871 |   |                         |   |   |        |  |
|     | 0 | Cytoplasmic             | 2 | 0 | OUT: 0 |  |
| 872 |   |                         |   |   |        |  |
|     |   |                         |   |   |        |  |

|     |   |                     |   |   |        |  |
|-----|---|---------------------|---|---|--------|--|
|     | 0 | Unknown             | 1 | 0 | IN: 0  |  |
| 873 |   |                     |   |   |        |  |
|     | 0 | Cytoplasmic         | 1 | 0 | OUT: 0 |  |
| 874 |   |                     |   |   |        |  |
|     | 0 | OuterMembrane       | 0 | 0 | OUT: 0 |  |
| 875 |   |                     |   |   |        |  |
|     | 0 | Cytoplasmic         | 0 | 4 | OUT: 0 |  |
| 876 |   |                     |   |   |        |  |
|     | 0 | CytoplasmicMembrane | 0 | 3 | IN: 12 |  |
| 877 |   |                     |   |   |        |  |
|     | 0 | Cytoplasmic         | 0 | 4 | IN: 5  |  |
| 878 |   |                     |   |   |        |  |
|     | 0 | Cytoplasmic         | 0 | 0 | OUT: 0 |  |
| 879 |   |                     |   |   |        |  |
|     | 0 | Unknown             | 0 | 0 | IN: 1  |  |
| 851 |   |                     |   |   |        |  |
|     | 0 | Cytoplasmic         | 0 | 3 | OUT: 0 |  |
| 850 |   |                     |   |   |        |  |
|     | 0 | Cytoplasmic         | 5 | 0 | OUT: 0 |  |
| 849 |   |                     |   |   |        |  |

|     |    |                     |   |    |        |  |
|-----|----|---------------------|---|----|--------|--|
|     | 0  | Cytoplasmic         | 4 | 0  | IN: 0  |  |
| 848 |    |                     |   |    |        |  |
|     | 0  | Cytoplasmic         | 0 | 12 | OUT: 0 |  |
| 855 |    |                     |   |    |        |  |
|     | 0  | Cytoplasmic         | 1 | 0  | OUT: 0 |  |
| 854 |    |                     |   |    |        |  |
|     | 0  | CytoplasmicMembrane | 0 | 0  | IN: 12 |  |
| 853 |    |                     |   |    |        |  |
|     | 0  | CytoplasmicMembrane | 0 | 0  | IN: 1  |  |
| 852 |    |                     |   |    |        |  |
|     | 0  | Cytoplasmic         | 0 | 0  | OUT: 0 |  |
| 859 |    |                     |   |    |        |  |
|     | 0  | Cytoplasmic         | 1 | 1  | IN: 1  |  |
| 858 |    |                     |   |    |        |  |
|     | 11 | Cytoplasmic         | 1 | 0  | IN: 1  |  |
| 857 |    |                     |   |    |        |  |
|     | 0  | Unknown             | 0 | 0  | IN: 0  |  |
| 856 |    |                     |   |    |        |  |
|     | 0  | Cytoplasmic         | 0 | 0  | OUT: 1 |  |

|     |   |             |    |   |        |  |
|-----|---|-------------|----|---|--------|--|
| 863 |   |             |    |   |        |  |
|     | 0 | Cytoplasmic | 1  | 0 | OUT: 0 |  |
| 862 |   |             |    |   |        |  |
|     | 0 | Cytoplasmic | 0  | 0 | IN: 0  |  |
| 861 |   |             |    |   |        |  |
|     | 0 | Cytoplasmic | 11 | 0 | OUT: 0 |  |
| 860 |   |             |    |   |        |  |
|     | 0 | Cytoplasmic | 1  | 0 | OUT: 0 |  |
| 834 |   |             |    |   |        |  |
|     | 0 | Cytoplasmic | 10 | 0 | OUT: 0 |  |
| 835 |   |             |    |   |        |  |
|     | 0 | Cytoplasmic | 0  | 2 | OUT: 0 |  |
| 832 |   |             |    |   |        |  |
|     | 0 | Unknown     | 0  | 0 | IN: 1  |  |
| 833 |   |             |    |   |        |  |
|     | 0 | Unknown     | 0  | 0 | OUT: 0 |  |
| 838 |   |             |    |   |        |  |
|     | 4 | Cytoplasmic | 13 | 0 | IN: 3  |  |
| 839 |   |             |    |   |        |  |
|     | 0 | Cytoplasmic | 22 | 2 | OUT: 0 |  |

|     |   |                         |   |    |        |  |
|-----|---|-------------------------|---|----|--------|--|
| 836 |   |                         |   |    |        |  |
|     | 0 | Cytoplasmic             | 0 | 0  | OUT: 0 |  |
| 837 |   |                         |   |    |        |  |
|     | 0 | Extracellular           | 1 | 71 | OUT: 0 |  |
| 842 |   |                         |   |    |        |  |
|     | 0 | Cytoplasmic             | 2 | 0  | OUT: 0 |  |
| 843 |   |                         |   |    |        |  |
|     | 0 | CytoplasmicMem<br>brane | 0 | 0  | OUT: 1 |  |
| 840 |   |                         |   |    |        |  |
|     | 0 | Unknown                 | 0 | 0  | OUT: 2 |  |
| 841 |   |                         |   |    |        |  |
|     | 0 | Cytoplasmic             | 8 | 0  | OUT: 0 |  |
| 846 |   |                         |   |    |        |  |
|     | 0 | Cytoplasmic             | 1 | 0  | OUT: 0 |  |
| 847 |   |                         |   |    |        |  |
|     | 0 | Cytoplasmic             | 1 | 0  | OUT: 1 |  |
| 844 |   |                         |   |    |        |  |
|     | 0 | CytoplasmicMem<br>brane | 0 | 2  | IN: 12 |  |
| 845 |   |                         |   |    |        |  |

|     |                                                                                     |                                                                                     |                                                                                       |                                                                                       |                                                                                       |                                                                                       |
|-----|-------------------------------------------------------------------------------------|-------------------------------------------------------------------------------------|---------------------------------------------------------------------------------------|---------------------------------------------------------------------------------------|---------------------------------------------------------------------------------------|---------------------------------------------------------------------------------------|
|     | 0                                                                                   | OuterMembrane                                                                       | 0                                                                                     | 4                                                                                     | OUT: 2                                                                                |                                                                                       |
| 956 |    |    |    |    |    |    |
|     | 3                                                                                   | Periplasmic                                                                         | 10                                                                                    | 1                                                                                     | OUT: 0                                                                                |                                                                                       |
| 957 |    |    |    |    |    |    |
|     | 0                                                                                   | Cytoplasmic                                                                         | 0                                                                                     | 0                                                                                     | OUT: 0                                                                                |                                                                                       |
| 958 |    |    |    |    |    |    |
|     | 0                                                                                   | Cytoplasmic                                                                         | 0                                                                                     | 0                                                                                     | OUT: 0                                                                                |                                                                                       |
| 959 |    |    |    |    |    |    |
|     | 0                                                                                   | Unknown                                                                             | 0                                                                                     | 0                                                                                     | OUT: 0                                                                                |                                                                                       |
| 952 |    |    |    |    |    |    |
|     | 0                                                                                   | Unknown                                                                             | 0                                                                                     | 0                                                                                     | IN: 0                                                                                 |                                                                                       |
| 953 |    |    |    |    |    |    |
|     | 0                                                                                   | Cytoplasmic                                                                         | 1                                                                                     | 0                                                                                     | OUT: 0                                                                                |                                                                                       |
| 954 |   |   |   |   |   |   |
|     | 0                                                                                   | Unknown                                                                             | 0                                                                                     | 0                                                                                     | OUT: 1                                                                                |                                                                                       |
| 955 |  |  |  |  |  |  |
|     | 0                                                                                   | Cytoplasmic                                                                         | 0                                                                                     | 0                                                                                     | OUT: 0                                                                                |                                                                                       |
| 948 |  |  |  |  |  |  |
|     | 0                                                                                   | Cytoplasmic                                                                         | 0                                                                                     | 0                                                                                     | IN: 0                                                                                 |                                                                                       |
| 949 |  |  |  |  |  |  |
|     |                                                                                     |                                                                                     |                                                                                       |                                                                                       |                                                                                       |                                                                                       |

|     |   |                         |   |   |        |  |
|-----|---|-------------------------|---|---|--------|--|
|     | 0 | Unknown                 | 1 | 0 | OUT: 1 |  |
| 950 |   |                         |   |   |        |  |
|     | 0 | Unknown                 | 0 | 0 | OUT: 0 |  |
| 951 |   |                         |   |   |        |  |
|     | 0 | Cytoplasmic             | 0 | 0 | OUT: 0 |  |
| 944 |   |                         |   |   |        |  |
|     | 0 | Unknown                 | 1 | 0 | IN: 3  |  |
| 945 |   |                         |   |   |        |  |
|     | 0 | Unknown                 | 0 | 0 | OUT: 0 |  |
| 946 |   |                         |   |   |        |  |
|     | 0 | Cytoplasmic             | 1 | 0 | OUT: 0 |  |
| 947 |   |                         |   |   |        |  |
|     | 4 | CytoplasmicMem<br>brane | 4 | 0 | OUT: 1 |  |
| 941 |   |                         |   |   |        |  |
|     | 0 | CytoplasmicMem<br>brane | 0 | 0 | IN: 12 |  |
| 940 |   |                         |   |   |        |  |
|     | 0 | CytoplasmicMem<br>brane | 0 | 0 | IN: 11 |  |
| 943 |   |                         |   |   |        |  |
|     |   |                         |   |   |        |  |

|     |   |                         |    |   |        |  |
|-----|---|-------------------------|----|---|--------|--|
|     | 0 | CytoplasmicMem<br>brane | 1  | 0 | OUT: 0 |  |
| 942 |   |                         |    |   |        |  |
|     | 0 | Cytoplasmic             | 1  | 0 | OUT: 0 |  |
| 937 |   |                         |    |   |        |  |
|     | 0 | Cytoplasmic             | 1  | 0 | OUT: 0 |  |
| 936 |   |                         |    |   |        |  |
|     | 0 | Cytoplasmic             | 0  | 0 | OUT: 0 |  |
| 939 |   |                         |    |   |        |  |
|     | 0 | Cytoplasmic             | 21 | 0 | OUT: 0 |  |
| 938 |   |                         |    |   |        |  |
|     | 0 | Extracellular           | 0  | 0 | IN: 1  |  |
| 933 |   |                         |    |   |        |  |
|     | 0 | Cytoplasmic             | 0  | 0 | IN: 0  |  |
| 932 |   |                         |    |   |        |  |
|     | 0 | CytoplasmicMem<br>brane | 0  | 0 | OUT: 6 |  |
| 935 |   |                         |    |   |        |  |
|     | 0 | Cytoplasmic             | 27 | 9 | IN: 0  |  |
| 934 |   |                         |    |   |        |  |
|     | 0 | CytoplasmicMem          | 0  | 1 | OUT: 5 |  |



|     |   | brane               |    |   |        |  |
|-----|---|---------------------|----|---|--------|--|
| 929 |   |                     |    |   |        |  |
|     | 0 | Cytoplasmic         | 28 | 0 | OUT: 0 |  |
| 928 |   |                     |    |   |        |  |
|     | 0 | Unknown             | 0  | 0 | OUT: 0 |  |
| 931 |   |                     |    |   |        |  |
|     | 0 | Cytoplasmic         | 1  | 0 | OUT: 1 |  |
| 930 |   |                     |    |   |        |  |
|     | 0 | Unknown             | 0  | 0 | OUT: 0 |  |
| 926 |   |                     |    |   |        |  |
|     | 0 | Cytoplasmic         | 2  | 2 | OUT: 0 |  |
| 927 |   |                     |    |   |        |  |
|     | 0 | Unknown             | 0  | 0 | OUT: 2 |  |
| 924 |   |                     |    |   |        |  |
|     | 0 | OuterMembrane       | 0  | 0 | IN: 1  |  |
| 925 |   |                     |    |   |        |  |
|     | 0 | CytoplasmicMembrane | 1  | 0 | OUT: 7 |  |
| 922 |   |                     |    |   |        |  |
|     | 0 | Cytoplasmic         | 7  | 0 | IN: 1  |  |
| 923 |   |                     |    |   |        |  |

|     |   |                         |    |   |         |  |
|-----|---|-------------------------|----|---|---------|--|
|     | 0 | Cytoplasmic             | 4  | 1 | OUT: 0  |  |
| 920 |   |                         |    |   |         |  |
|     | 0 | Cytoplasmic             | 5  | 2 | OUT: 0  |  |
| 921 |   |                         |    |   |         |  |
|     | 1 | Cytoplasmic             | 22 | 2 | OUT: 0  |  |
| 918 |   |                         |    |   |         |  |
|     | 0 | CytoplasmicMem<br>brane | 0  | 0 | IN: 12  |  |
| 919 |   |                         |    |   |         |  |
|     | 0 | CytoplasmicMem<br>brane | 1  | 1 | IN: 1   |  |
| 916 |   |                         |    |   |         |  |
|     | 0 | Cytoplasmic             | 5  | 0 | OUT: 0  |  |
| 917 |   |                         |    |   |         |  |
|     | 0 | Cytoplasmic             | 1  | 0 | OUT: 0  |  |
| 914 |   |                         |    |   |         |  |
|     | 0 | Cytoplasmic             | 0  | 9 | OUT: 0  |  |
| 915 |   |                         |    |   |         |  |
|     | 0 | Cytoplasmic             | 1  | 0 | IN: 2   |  |
| 912 |   |                         |    |   |         |  |
|     | 0 | CytoplasmicMem          | 0  | 0 | OUT: 11 |  |

|     |   | brane               |    |   |        |  |
|-----|---|---------------------|----|---|--------|--|
| 913 |   |                     |    |   |        |  |
|     | 0 | Unknown             | 0  | 0 | OUT: 1 |  |
| 911 |   |                     |    |   |        |  |
|     | 0 | OuterMembrane       | 0  | 0 | OUT: 0 |  |
| 910 |   |                     |    |   |        |  |
|     | 0 | Periplasmic         | 0  | 0 | IN: 3  |  |
| 909 |   |                     |    |   |        |  |
|     | 0 | Cytoplasmic         | 11 | 0 | IN: 0  |  |
| 908 |   |                     |    |   |        |  |
|     | 0 | Cytoplasmic         | 0  | 0 | OUT: 1 |  |
| 907 |   |                     |    |   |        |  |
|     | 0 | OuterMembrane       | 1  | 1 | IN: 1  |  |
| 906 |   |                     |    |   |        |  |
|     | 0 | CytoplasmicMembrane | 0  | 0 | OUT: 4 |  |
| 905 |   |                     |    |   |        |  |
|     | 0 | Unknown             | 0  | 0 | IN: 1  |  |
| 904 |   |                     |    |   |        |  |
|     | 0 | CytoplasmicMembrane | 1  | 0 | OUT: 0 |  |

|      |   |                     |    |   |        |  |
|------|---|---------------------|----|---|--------|--|
| 903  |   |                     |    |   |        |  |
|      | 0 | Cytoplasmic         | 1  | 0 | OUT: 0 |  |
| 902  |   |                     |    |   |        |  |
|      | 0 | Unknown             | 0  | 0 | IN: 1  |  |
| 901  |   |                     |    |   |        |  |
|      | 0 | CytoplasmicMembrane | 42 | 0 | IN: 0  |  |
| 900  |   |                     |    |   |        |  |
|      | 0 | Cytoplasmic         | 5  | 0 | OUT: 0 |  |
| 899  |   |                     |    |   |        |  |
|      | 0 | CytoplasmicMembrane | 0  | 0 | IN: 12 |  |
| 898  |   |                     |    |   |        |  |
|      | 0 | CytoplasmicMembrane | 0  | 5 | OUT: 4 |  |
| 897  |   |                     |    |   |        |  |
|      | 0 | CytoplasmicMembrane | 2  | 0 | IN: 18 |  |
| 896  |   |                     |    |   |        |  |
|      | 0 | Cytoplasmic         | 17 | 0 | IN: 0  |  |
| 1016 |   |                     |    |   |        |  |
|      | 0 | CytoplasmicMem      | 0  | 0 | IN: 8  |  |

|      |    | brane               |    |   |        |  |
|------|----|---------------------|----|---|--------|--|
| 1017 |    |                     |    |   |        |  |
|      | 5  | Cytoplasmic         | 13 | 0 | OUT: 3 |  |
| 1018 |    |                     |    |   |        |  |
|      | 0  | Cytoplasmic         | 11 | 2 | OUT: 0 |  |
| 1019 |    |                     |    |   |        |  |
|      | 0  | Cytoplasmic         | 0  | 0 | OUT: 0 |  |
| 1020 |    |                     |    |   |        |  |
|      | 0  | Unknown             | 0  | 0 | OUT: 0 |  |
| 1021 |    |                     |    |   |        |  |
|      | 0  | Cytoplasmic         | 0  | 0 | OUT: 0 |  |
| 1022 |    |                     |    |   |        |  |
|      | 0  | Cytoplasmic         | 1  | 5 | IN: 1  |  |
| 1023 |    |                     |    |   |        |  |
|      | 0  | Cytoplasmic         | 0  | 0 | IN: 1  |  |
| 1008 |    |                     |    |   |        |  |
|      | 0  | OuterMembrane       | 0  | 0 | OUT: 0 |  |
| 1009 |    |                     |    |   |        |  |
|      | 15 | CytoplasmicMembrane | 6  | 0 | OUT: 0 |  |
| 1010 |    |                     |    |   |        |  |

|      |    |                     |    |    |        |  |
|------|----|---------------------|----|----|--------|--|
|      | 6  | Cytoplasmic         | 1  | 10 | OUT: 0 |  |
| 1011 |    |                     |    |    |        |  |
|      | 0  | Cytoplasmic         | 0  | 0  | OUT: 0 |  |
| 1012 |    |                     |    |    |        |  |
|      | 0  | Cytoplasmic         | 4  | 0  | OUT: 0 |  |
| 1013 |    |                     |    |    |        |  |
|      | 0  | CytoplasmicMembrane | 0  | 0  | IN: 8  |  |
| 1014 |    |                     |    |    |        |  |
|      | 0  | Unknown             | 0  | 0  | OUT: 0 |  |
| 1015 |    |                     |    |    |        |  |
|      | 0  | CytoplasmicMembrane | 0  | 0  | IN: 5  |  |
| 1001 |    |                     |    |    |        |  |
|      | 0  | Cytoplasmic         | 0  | 0  | IN: 2  |  |
| 1000 |    |                     |    |    |        |  |
|      | 0  | OuterMembrane       | 0  | 15 | OUT: 0 |  |
| 1003 |    |                     |    |    |        |  |
|      | 0  | Cytoplasmic         | 0  | 0  | OUT: 0 |  |
| 1002 |    |                     |    |    |        |  |
|      | 14 | Cytoplasmic         | 23 | 0  | OUT: 0 |  |

|      |   |                     |    |   |        |  |
|------|---|---------------------|----|---|--------|--|
| 1005 |   |                     |    |   |        |  |
|      | 0 | Unknown             | 0  | 0 | OUT: 1 |  |
| 1004 |   |                     |    |   |        |  |
|      | 0 | Cytoplasmic         | 11 | 1 | IN: 3  |  |
| 1007 |   |                     |    |   |        |  |
|      | 0 | Cytoplasmic         | 0  | 0 | OUT: 0 |  |
| 1006 |   |                     |    |   |        |  |
|      | 0 | Cytoplasmic         | 4  | 0 | OUT: 0 |  |
| 993  |   |                     |    |   |        |  |
|      | 0 | Unknown             | 0  | 0 | OUT: 0 |  |
| 992  |   |                     |    |   |        |  |
|      | 0 | Cytoplasmic         | 1  | 0 | OUT: 0 |  |
| 995  |   |                     |    |   |        |  |
|      | 0 | OuterMembrane       | 1  | 1 | IN: 1  |  |
| 994  |   |                     |    |   |        |  |
|      | 0 | Unknown             | 0  | 0 | OUT: 0 |  |
| 997  |   |                     |    |   |        |  |
|      | 0 | CytoplasmicMembrane | 0  | 0 | IN: 4  |  |
| 996  |   |                     |    |   |        |  |
|      | 0 | Cytoplasmic         | 0  | 0 | OUT: 0 |  |

|     |    |                      |   |   |        |   |
|-----|----|----------------------|---|---|--------|---|
| 999 |    |                      |   |   |        |   |
|     | 0  | CytoplasmicMem brane | 1 | 0 | OUT: 5 |   |
| 998 |    |                      |   |   |        |   |
|     | 0  | Unknown              | 0 | 0 | OUT: 0 |   |
| 986 |    |                      |   |   |        |   |
|     | 0  | Cytoplasmic          | 0 | 0 | OUT: 0 |   |
| 987 |    |                      |   |   |        |   |
|     | 13 | CytoplasmicMem brane | 5 | 3 | OUT: 0 |   |
| 984 |    |                      |   |   |        |   |
|     | 23 | Cytoplasmic          | 2 | 0 | OUT: 0 |   |
| 985 |    |                      |   |   |        |   |
|     | 0  | CytoplasmicMem brane | 1 | 0 | OUT: 1 |   |
| 990 |    |                      |   |   |        |   |
|     | 0  | Cytoplasmic          | 0 | 0 | OUT: 0 |   |
| 991 |    |                      |   |   |        |   |
|     | 0  | Unknown              | 0 | 3 | OUT: 2 |   |
| 988 |    |                      |   |   |        |   |
|     | 0  | Cytoplasmic          | 0 | 0 | OUT: 0 |   |
|     | .  | .                    | . | . | .      | . |



|     |   |                     |   |    |        |  |
|-----|---|---------------------|---|----|--------|--|
| 989 | 0 | Cytoplasmic         | 4 | 2  | IN: 1  |  |
| 978 |   |                     |   |    |        |  |
|     | 0 | Unknown             | 0 | 9  | IN: 1  |  |
| 979 |   |                     |   |    |        |  |
|     | 0 | Cytoplasmic         | 0 | 0  | OUT: 2 |  |
| 976 |   |                     |   |    |        |  |
|     | 0 | OuterMembrane       | 0 | 14 | OUT: 0 |  |
| 977 |   |                     |   |    |        |  |
|     | 0 | Cytoplasmic         | 1 | 0  | OUT: 0 |  |
| 982 |   |                     |   |    |        |  |
|     | 0 | Extracellular       | 1 | 2  | OUT: 0 |  |
| 983 |   |                     |   |    |        |  |
|     | 0 | Cytoplasmic         | 0 | 0  | OUT: 0 |  |
| 980 |   |                     |   |    |        |  |
|     | 0 | CytoplasmicMembrane | 4 | 0  | OUT: 1 |  |
| 981 |   |                     |   |    |        |  |
|     | 0 | Unknown             | 0 | 0  | OUT: 0 |  |
| 971 |   |                     |   |    |        |  |
|     | 0 | OuterMembrane       | 0 | 2  | OUT: 0 |  |
| 970 |   |                     |   |    |        |  |

|     |   |                         |   |    |        |  |
|-----|---|-------------------------|---|----|--------|--|
|     | 0 | Unknown                 | 0 | 0  | IN: 1  |  |
| 969 |   |                         |   |    |        |  |
|     | 0 | Periplasmic             | 0 | 7  | OUT: 0 |  |
| 968 |   |                         |   |    |        |  |
|     | 0 | CytoplasmicMem<br>brane | 0 | 0  | IN: 2  |  |
| 975 |   |                         |   |    |        |  |
|     | 0 | Cytoplasmic             | 2 | 0  | OUT: 2 |  |
| 974 |   |                         |   |    |        |  |
|     | 0 | Extracellular           | 0 | 14 | OUT: 0 |  |
| 973 |   |                         |   |    |        |  |
|     | 0 | Cytoplasmic             | 2 | 0  | OUT: 1 |  |
| 972 |   |                         |   |    |        |  |
|     | 0 | Cytoplasmic             | 0 | 0  | OUT: 0 |  |
| 963 |   |                         |   |    |        |  |
|     | 0 | CytoplasmicMem<br>brane | 0 | 3  | IN: 1  |  |
| 962 |   |                         |   |    |        |  |
|     | 0 | Cytoplasmic             | 2 | 0  | OUT: 0 |  |
| 961 |   |                         |   |    |        |  |
|     | 0 | CytoplasmicMem          | 0 | 4  | OUT: 3 |  |

|      |    |                         |    |    |        |  |
|------|----|-------------------------|----|----|--------|--|
|      |    | brane                   |    |    |        |  |
| 960  |    |                         |    |    |        |  |
|      | 0  | CytoplasmicMem<br>brane | 0  | 0  | OUT: 5 |  |
| 967  |    |                         |    |    |        |  |
|      | 0  | CytoplasmicMem<br>brane | 0  | 0  | IN: 6  |  |
| 966  |    |                         |    |    |        |  |
|      | 0  | CytoplasmicMem<br>brane | 28 | 35 | OUT: 0 |  |
| 965  |    |                         |    |    |        |  |
|      | 0  | Cytoplasmic             | 1  | 0  | IN: 0  |  |
| 964  |    |                         |    |    |        |  |
|      | 0  | Unknown                 | 0  | 15 | OUT: 0 |  |
| 1100 |    |                         |    |    |        |  |
|      | 0  | CytoplasmicMem<br>brane | 0  | 0  | OUT: 0 |  |
| 1101 |    |                         |    |    |        |  |
|      | 30 | Cytoplasmic             | 0  | 0  | OUT: 0 |  |
| 1102 |    |                         |    |    |        |  |
|      | 0  | Unknown                 | 1  | 0  | OUT: 0 |  |
| 1103 |    |                         |    |    |        |  |

|      |   |                         |   |   |        |  |
|------|---|-------------------------|---|---|--------|--|
|      | 0 | Cytoplasmic             | 0 | 0 | OUT: 0 |  |
| 1096 |   |                         |   |   |        |  |
|      | 0 | Unknown                 | 1 | 0 | OUT: 2 |  |
| 1097 |   |                         |   |   |        |  |
|      | 0 | Cytoplasmic             | 0 | 0 | OUT: 0 |  |
| 1098 |   |                         |   |   |        |  |
|      | 0 | Unknown                 | 0 | 0 | OUT: 1 |  |
| 1099 |   |                         |   |   |        |  |
|      | 0 | Cytoplasmic             | 0 | 0 | OUT: 0 |  |
| 1092 |   |                         |   |   |        |  |
|      | 0 | Extracellular           | 0 | 0 | OUT: 0 |  |
| 1093 |   |                         |   |   |        |  |
|      | 0 | CytoplasmicMem<br>brane | 0 | 0 | IN: 3  |  |
| 1094 |   |                         |   |   |        |  |
|      | 0 | Periplasmic             | 0 | 0 | OUT: 1 |  |
| 1095 |   |                         |   |   |        |  |
|      | 0 | Unknown                 | 0 | 0 | OUT: 3 |  |
| 1088 |   |                         |   |   |        |  |
|      | 0 | CytoplasmicMem<br>brane | 0 | 0 | OUT: 0 |  |

|      |   |                         |    |   |        |  |
|------|---|-------------------------|----|---|--------|--|
| 1089 |   |                         |    |   |        |  |
|      | 0 | CytoplasmicMem<br>brane | 0  | 0 | IN: 5  |  |
| 1090 |   |                         |    |   |        |  |
|      | 0 | Unknown                 | 0  | 0 | IN: 0  |  |
| 1091 |   |                         |    |   |        |  |
|      | 0 | Unknown                 | 0  | 0 | OUT: 0 |  |
| 1117 |   |                         |    |   |        |  |
|      | 0 | Cytoplasmic             | 14 | 0 | OUT: 0 |  |
| 1116 |   |                         |    |   |        |  |
|      | 0 | Cytoplasmic             | 1  | 2 | OUT: 1 |  |
| 1119 |   |                         |    |   |        |  |
|      | 0 | Cytoplasmic             | 4  | 0 | OUT: 0 |  |
| 1118 |   |                         |    |   |        |  |
|      | 0 | Unknown                 | 0  | 0 | OUT: 0 |  |
| 1113 |   |                         |    |   |        |  |
|      | 0 | Unknown                 | 0  | 0 | OUT: 0 |  |
| 1112 |   |                         |    |   |        |  |
|      | 0 | CytoplasmicMem<br>brane | 2  | 0 | IN: 1  |  |
| 1115 |   |                         |    |   |        |  |

|      |    |                     |    |   |        |  |
|------|----|---------------------|----|---|--------|--|
|      | 0  | Cytoplasmic         | 1  | 0 | IN: 6  |  |
| 1114 |    |                     |    |   |        |  |
|      | 0  | Cytoplasmic         | 0  | 0 | OUT: 2 |  |
| 1109 |    |                     |    |   |        |  |
|      | 0  | Cytoplasmic         | 0  | 0 | IN: 1  |  |
| 1108 |    |                     |    |   |        |  |
|      | 0  | Cytoplasmic         | 1  | 0 | OUT: 0 |  |
| 1111 |    |                     |    |   |        |  |
|      | 0  | CytoplasmicMembrane | 0  | 0 | OUT: 6 |  |
| 1110 |    |                     |    |   |        |  |
|      | 0  | CytoplasmicMembrane | 0  | 0 | IN: 3  |  |
| 1105 |    |                     |    |   |        |  |
|      | 0  | Cytoplasmic         | 0  | 0 | OUT: 0 |  |
| 1104 |    |                     |    |   |        |  |
|      | 0  | Cytoplasmic         | 2  | 0 | OUT: 0 |  |
| 1107 |    |                     |    |   |        |  |
|      | 43 | Cytoplasmic         | 16 | 0 | OUT: 0 |  |
| 1106 |    |                     |    |   |        |  |
|      | 0  | Cytoplasmic         | 1  | 0 | OUT: 0 |  |

|      |   |                         |   |   |        |   |
|------|---|-------------------------|---|---|--------|---|
| 1134 |   |                         |   |   |        |   |
|      | 0 | Cytoplasmic             | 0 | 0 | OUT: 0 |   |
| 1135 |   |                         |   |   |        |   |
|      | 0 | Cytoplasmic             | 2 | 2 | OUT: 0 |   |
| 1132 |   |                         |   |   |        |   |
|      | 0 | Cytoplasmic             | 0 | 0 | OUT: 0 |   |
| 1133 |   |                         |   |   |        |   |
|      | 0 | CytoplasmicMem<br>brane | 0 | 0 | IN: 2  |   |
| 1130 |   |                         |   |   |        |   |
|      | 0 | CytoplasmicMem<br>brane | 1 | 0 | IN: 4  |   |
| 1131 |   |                         |   |   |        |   |
|      | 0 | Unknown                 | 0 | 0 | OUT: 0 |   |
| 1128 |   |                         |   |   |        |   |
|      | 0 | Cytoplasmic             | 2 | 0 | OUT: 0 |   |
| 1129 |   |                         |   |   |        |   |
|      | 0 | CytoplasmicMem<br>brane | 0 | 0 | IN: 1  |   |
| 1126 |   |                         |   |   |        |   |
|      | 0 | Unknown                 | 0 | 0 | IN: 0  |   |
|      | . | .                       | . | . | .      | . |

|      |   |                     |   |   |        |  |
|------|---|---------------------|---|---|--------|--|
| 1127 | 0 | CytoplasmicMembrane | 0 | 0 | OUT: 5 |  |
| 1124 |   |                     |   |   |        |  |
|      | 0 | CytoplasmicMembrane | 0 | 0 | OUT: 3 |  |
| 1125 |   |                     |   |   |        |  |
|      | 0 | Cytoplasmic         | 0 | 0 | OUT: 0 |  |
| 1122 |   |                     |   |   |        |  |
|      | 0 | Unknown             | 0 | 0 | OUT: 0 |  |
| 1123 |   |                     |   |   |        |  |
|      | 0 | Cytoplasmic         | 1 | 0 | IN: 0  |  |
| 1120 |   |                     |   |   |        |  |
|      | 0 | Unknown             | 1 | 0 | IN: 0  |  |
| 1121 |   |                     |   |   |        |  |
|      | 0 | Cytoplasmic         | 0 | 0 | OUT: 0 |  |
| 1151 |   |                     |   |   |        |  |
|      | 0 | Cytoplasmic         | 0 | 0 | OUT: 0 |  |
| 1150 |   |                     |   |   |        |  |
|      | 0 | Cytoplasmic         | 1 | 0 | OUT: 0 |  |
| 1149 |   |                     |   |   |        |  |
|      | 0 | Cytoplasmic         | 1 | 0 | OUT: 3 |  |



|      |   |                     |    |   |        |  |
|------|---|---------------------|----|---|--------|--|
| 1148 |   |                     |    |   |        |  |
|      | 0 | CytoplasmicMembrane | 0  | 0 | IN: 12 |  |
| 1147 |   |                     |    |   |        |  |
|      | 0 | Cytoplasmic         | 0  | 0 | OUT: 0 |  |
| 1146 |   |                     |    |   |        |  |
|      | 0 | CytoplasmicMembrane | 11 | 0 | OUT: 0 |  |
| 1145 |   |                     |    |   |        |  |
|      | 0 | Periplasmic         | 1  | 0 | IN: 1  |  |
| 1144 |   |                     |    |   |        |  |
|      | 0 | Cytoplasmic         | 1  | 0 | IN: 1  |  |
| 1143 |   |                     |    |   |        |  |
|      | 0 | Cytoplasmic         | 1  | 0 | IN: 0  |  |
| 1142 |   |                     |    |   |        |  |
|      | 0 | Cytoplasmic         | 3  | 0 | IN: 1  |  |
| 1141 |   |                     |    |   |        |  |
|      | 0 | Unknown             | 0  | 3 | OUT: 0 |  |
| 1140 |   |                     |    |   |        |  |
|      | 0 | Unknown             | 0  | 0 | OUT: 0 |  |
| 1139 |   |                     |    |   |        |  |

|      |   |                         |   |   |        |  |
|------|---|-------------------------|---|---|--------|--|
|      | 0 | Cytoplasmic             | 0 | 0 | OUT: 0 |  |
| 1138 |   |                         |   |   |        |  |
|      | 0 | Unknown                 | 1 | 0 | OUT: 2 |  |
| 1137 |   |                         |   |   |        |  |
|      | 0 | Cytoplasmic             | 4 | 0 | OUT: 0 |  |
| 1136 |   |                         |   |   |        |  |
|      | 1 | Cytoplasmic             | 1 | 0 | OUT: 1 |  |
| 1032 |   |                         |   |   |        |  |
|      | 0 | Cytoplasmic             | 0 | 0 | OUT: 0 |  |
| 1033 |   |                         |   |   |        |  |
|      | 0 | CytoplasmicMem<br>brane | 0 | 0 | IN: 1  |  |
| 1034 |   |                         |   |   |        |  |
|      | 0 | Cytoplasmic             | 0 | 0 | OUT: 1 |  |
| 1035 |   |                         |   |   |        |  |
|      | 0 | Cytoplasmic             | 1 | 2 | IN: 1  |  |
| 1036 |   |                         |   |   |        |  |
|      | 0 | Cytoplasmic             | 0 | 0 | OUT: 0 |  |
| 1037 |   |                         |   |   |        |  |
|      | 0 | Cytoplasmic             | 0 | 0 | OUT: 0 |  |
| 1038 |   |                         |   |   |        |  |

|      |   |                         |    |   |        |  |
|------|---|-------------------------|----|---|--------|--|
|      | 0 | Cytoplasmic             | 25 | 0 | OUT: 1 |  |
| 1039 |   |                         |    |   |        |  |
|      | 0 | Unknown                 | 0  | 0 | OUT: 0 |  |
| 1024 |   |                         |    |   |        |  |
|      | 0 | Cytoplasmic             | 0  | 2 | OUT: 0 |  |
| 1025 |   |                         |    |   |        |  |
|      | 0 | Cytoplasmic             | 0  | 0 | OUT: 0 |  |
| 1026 |   |                         |    |   |        |  |
|      | 0 | Unknown                 | 0  | 0 | OUT: 0 |  |
| 1027 |   |                         |    |   |        |  |
|      | 0 | CytoplasmicMem<br>brane | 0  | 0 | OUT: 2 |  |
| 1028 |   |                         |    |   |        |  |
|      | 0 | CytoplasmicMem<br>brane | 0  | 0 | IN: 1  |  |
| 1029 |   |                         |    |   |        |  |
|      | 0 | Cytoplasmic             | 1  | 0 | OUT: 0 |  |
| 1030 |   |                         |    |   |        |  |
|      | 0 | CytoplasmicMem<br>brane | 0  | 0 | OUT: 2 |  |
| 1031 |   |                         |    |   |        |  |
|      |   |                         |    |   |        |  |

|      |   |                         |    |   |        |  |
|------|---|-------------------------|----|---|--------|--|
|      | 0 | Cytoplasmic             | 10 | 0 | OUT: 1 |  |
| 1049 |   |                         |    |   |        |  |
|      | 0 | Cytoplasmic             | 1  | 0 | OUT: 0 |  |
| 1048 |   |                         |    |   |        |  |
|      | 0 | CytoplasmicMem<br>brane | 1  | 0 | IN: 4  |  |
| 1051 |   |                         |    |   |        |  |
|      | 0 | Cytoplasmic             | 1  | 0 | IN: 0  |  |
| 1050 |   |                         |    |   |        |  |
|      | 0 | Cytoplasmic             | 1  | 1 | OUT: 0 |  |
| 1053 |   |                         |    |   |        |  |
|      | 0 | CytoplasmicMem<br>brane | 0  | 3 | OUT: 0 |  |
| 1052 |   |                         |    |   |        |  |
|      | 0 | CytoplasmicMem<br>brane | 0  | 4 | OUT: 2 |  |
| 1055 |   |                         |    |   |        |  |
|      | 0 | Cytoplasmic             | 0  | 0 | OUT: 0 |  |
| 1054 |   |                         |    |   |        |  |
|      | 0 | Cytoplasmic             | 0  | 0 | OUT: 0 |  |
| 1041 |   |                         |    |   |        |  |
|      |   |                         |    |   |        |  |

|      |   |                     |    |    |        |  |
|------|---|---------------------|----|----|--------|--|
|      | 0 | CytoplasmicMembrane | 10 | 0  | OUT: 0 |  |
| 1040 |   |                     |    |    |        |  |
|      | 0 | Cytoplasmic         | 1  | 0  | OUT: 0 |  |
| 1043 |   |                     |    |    |        |  |
|      | 0 | Unknown             | 0  | 0  | IN: 1  |  |
| 1042 |   |                     |    |    |        |  |
|      | 0 | Unknown             | 0  | 0  | OUT: 0 |  |
| 1045 |   |                     |    |    |        |  |
|      | 0 | Cytoplasmic         | 0  | 0  | IN: 1  |  |
| 1044 |   |                     |    |    |        |  |
|      | 0 | Unknown             | 0  | 0  | OUT: 1 |  |
| 1047 |   |                     |    |    |        |  |
|      | 0 | CytoplasmicMembrane | 0  | 0  | OUT: 3 |  |
| 1046 |   |                     |    |    |        |  |
|      | 0 | Cytoplasmic         | 6  | 23 | OUT: 0 |  |
| 1066 |   |                     |    |    |        |  |
|      | 0 | Unknown             | 0  | 0  | OUT: 0 |  |
| 1067 |   |                     |    |    |        |  |
|      | 0 | Cytoplasmic         | 14 | 0  | OUT: 0 |  |

|      |   |                     |    |   |        |  |
|------|---|---------------------|----|---|--------|--|
| 1064 |   |                     |    |   |        |  |
|      | 0 | Cytoplasmic         | 0  | 0 | OUT: 0 |  |
| 1065 |   |                     |    |   |        |  |
|      | 0 | Cytoplasmic         | 0  | 4 | OUT: 0 |  |
| 1070 |   |                     |    |   |        |  |
|      | 0 | Cytoplasmic         | 0  | 0 | IN: 1  |  |
| 1071 |   |                     |    |   |        |  |
|      | 0 | CytoplasmicMembrane | 1  | 0 | OUT: 0 |  |
| 1068 |   |                     |    |   |        |  |
|      | 0 | Unknown             | 1  | 0 | OUT: 0 |  |
| 1069 |   |                     |    |   |        |  |
|      | 0 | Cytoplasmic         | 0  | 2 | IN: 1  |  |
| 1058 |   |                     |    |   |        |  |
|      | 0 | Cytoplasmic         | 5  | 3 | IN: 0  |  |
| 1059 |   |                     |    |   |        |  |
|      | 0 | Cytoplasmic         | 13 | 0 | IN: 1  |  |
| 1056 |   |                     |    |   |        |  |
|      | 0 | Cytoplasmic         | 0  | 1 | OUT: 0 |  |
| 1057 |   |                     |    |   |        |  |
|      | 0 | OuterMembrane       | 0  | 0 | OUT: 0 |  |

|      |                                                                                     |                                                                                     |                                                                                       |                                                                                       |                                                                                       |                                                                                       |
|------|-------------------------------------------------------------------------------------|-------------------------------------------------------------------------------------|---------------------------------------------------------------------------------------|---------------------------------------------------------------------------------------|---------------------------------------------------------------------------------------|---------------------------------------------------------------------------------------|
| 1062 |    |    |    |    |    |    |
|      | 0                                                                                   | Unknown                                                                             | 6                                                                                     | 0                                                                                     | OUT: 0                                                                                |                                                                                       |
| 1063 |    |    |    |    |    |    |
|      | 0                                                                                   | Cytoplasmic                                                                         | 1                                                                                     | 0                                                                                     | OUT: 0                                                                                |                                                                                       |
| 1060 |    |    |    |    |    |    |
|      | 0                                                                                   | Unknown                                                                             | 0                                                                                     | 0                                                                                     | IN: 3                                                                                 |                                                                                       |
| 1061 |    |    |    |    |    |    |
|      | 0                                                                                   | Cytoplasmic                                                                         | 25                                                                                    | 0                                                                                     | OUT: 0                                                                                |                                                                                       |
| 1083 |    |    |    |    |    |    |
|      | 0                                                                                   | Cytoplasmic                                                                         | 0                                                                                     | 0                                                                                     | IN: 0                                                                                 |                                                                                       |
| 1082 |    |    |    |    |    |    |
|      | 0                                                                                   | Cytoplasmic                                                                         | 1                                                                                     | 0                                                                                     | IN: 1                                                                                 |                                                                                       |
| 1081 |    |    |    |    |    |    |
|      | 2                                                                                   | Cytoplasmic                                                                         | 17                                                                                    | 0                                                                                     | OUT: 0                                                                                |                                                                                       |
| 1080 |  |  |  |  |  |  |
|      | 0                                                                                   | Cytoplasmic                                                                         | 1                                                                                     | 0                                                                                     | OUT: 0                                                                                |                                                                                       |
| 1087 |  |  |  |  |  |  |
|      | 14                                                                                  | Cytoplasmic                                                                         | 13                                                                                    | 14                                                                                    | IN: 0                                                                                 |                                                                                       |
| 1086 |  |  |  |  |  |  |
|      | 0                                                                                   | Unknown                                                                             | 0                                                                                     | 0                                                                                     | OUT: 0                                                                                |                                                                                       |

|      |     |                         |    |   |        |  |
|------|-----|-------------------------|----|---|--------|--|
| 1085 |     |                         |    |   |        |  |
|      | 0   | CytoplasmicMem<br>brane | 0  | 0 | OUT: 6 |  |
| 1084 |     |                         |    |   |        |  |
|      | 0   | Unknown                 | 0  | 0 | IN: 1  |  |
| 1075 |     |                         |    |   |        |  |
|      | 0   | Cytoplasmic             | 7  | 0 | OUT: 0 |  |
| 1074 |     |                         |    |   |        |  |
|      | 14  | Cytoplasmic             | 17 | 2 | OUT: 0 |  |
| 1073 |     |                         |    |   |        |  |
|      | 0   | Unknown                 | 0  | 0 | IN: 0  |  |
| 1072 |     |                         |    |   |        |  |
|      | 0   | Cytoplasmic             | 0  | 0 | OUT: 0 |  |
| 1079 |     |                         |    |   |        |  |
|      | 0   | Cytoplasmic             | 0  | 0 | OUT: 0 |  |
| 1078 |     |                         |    |   |        |  |
|      | 0   | Periplasmic             | 0  | 0 | IN: 1  |  |
| 1077 |     |                         |    |   |        |  |
|      | 209 | CytoplasmicMem<br>brane | 21 | 0 | IN: 2  |  |
| 1076 |     |                         |    |   |        |  |



|      |   |                         |    |   |        |  |
|------|---|-------------------------|----|---|--------|--|
|      | 8 | CytoplasmicMem<br>brane | 21 | 1 | IN: 4  |  |
| 1221 |   |                         |    |   |        |  |
|      | 0 | CytoplasmicMem<br>brane | 0  | 0 | IN: 6  |  |
| 1220 |   |                         |    |   |        |  |
|      | 6 | CytoplasmicMem<br>brane | 6  | 3 | OUT: 0 |  |
| 1223 |   |                         |    |   |        |  |
|      | 0 | CytoplasmicMem<br>brane | 0  | 0 | OUT: 4 |  |
| 1222 |   |                         |    |   |        |  |
|      | 0 | Cytoplasmic             | 14 | 0 | OUT: 0 |  |
| 1217 |   |                         |    |   |        |  |
|      | 0 | Cytoplasmic             | 0  | 0 | OUT: 0 |  |
| 1216 |   |                         |    |   |        |  |
|      | 0 | Extracellular           | 10 | 0 | IN: 1  |  |
| 1219 |   |                         |    |   |        |  |
|      | 0 | Cytoplasmic             | 0  | 0 | OUT: 0 |  |
| 1218 |   |                         |    |   |        |  |
|      | 0 | Cytoplasmic             | 0  | 0 | IN: 1  |  |
| 1229 |   |                         |    |   |        |  |

|      |                                                                                     |                                                                                     |                                                                                       |                                                                                       |                                                                                       |                                                                                       |
|------|-------------------------------------------------------------------------------------|-------------------------------------------------------------------------------------|---------------------------------------------------------------------------------------|---------------------------------------------------------------------------------------|---------------------------------------------------------------------------------------|---------------------------------------------------------------------------------------|
|      | 0                                                                                   | CytoplasmicMem<br>brane                                                             | 0                                                                                     | 0                                                                                     | OUT: 0                                                                                |                                                                                       |
| 1228 |    |    |    |    |    |    |
|      | 0                                                                                   | Cytoplasmic                                                                         | 0                                                                                     | 0                                                                                     | OUT: 0                                                                                |                                                                                       |
| 1231 |    |    |    |    |    |    |
|      | 0                                                                                   | CytoplasmicMem<br>brane                                                             | 0                                                                                     | 0                                                                                     | OUT: 0                                                                                |                                                                                       |
| 1230 |    |    |    |    |    |    |
|      | 0                                                                                   | Cytoplasmic                                                                         | 0                                                                                     | 0                                                                                     | OUT: 2                                                                                |                                                                                       |
| 1225 |    |    |    |    |    |    |
|      | 12                                                                                  | Cytoplasmic                                                                         | 11                                                                                    | 0                                                                                     | OUT: 0                                                                                |                                                                                       |
| 1224 |    |    |    |    |    |    |
|      | 0                                                                                   | Cytoplasmic                                                                         | 0                                                                                     | 0                                                                                     | OUT: 0                                                                                |                                                                                       |
| 1227 |    |    |    |    |    |    |
|      | 0                                                                                   | Unknown                                                                             | 0                                                                                     | 3                                                                                     | IN: 2                                                                                 |                                                                                       |
| 1226 |  |  |  |  |  |  |
|      | 0                                                                                   | Unknown                                                                             | 0                                                                                     | 0                                                                                     | OUT: 0                                                                                |                                                                                       |
| 1236 |  |  |  |  |  |  |
|      | 0                                                                                   | Unknown                                                                             | 0                                                                                     | 0                                                                                     | OUT: 0                                                                                |                                                                                       |
| 1237 |  |  |  |  |  |  |
|      | 0                                                                                   | CytoplasmicMem                                                                      | 0                                                                                     | 0                                                                                     | OUT: 0                                                                                |                                                                                       |

|      |    |                     |    |   |        |  |
|------|----|---------------------|----|---|--------|--|
|      |    | brane               |    |   |        |  |
| 1238 |    |                     |    |   |        |  |
|      | 0  | Unknown             | 0  | 0 | OUT: 0 |  |
| 1239 |    |                     |    |   |        |  |
|      | 0  | Cytoplasmic         | 1  | 0 | OUT: 0 |  |
| 1232 |    |                     |    |   |        |  |
|      | 0  | CytoplasmicMembrane | 1  | 0 | IN: 10 |  |
| 1233 |    |                     |    |   |        |  |
|      | 11 | Cytoplasmic         | 28 | 0 | OUT: 0 |  |
| 1234 |    |                     |    |   |        |  |
|      | 0  | Cytoplasmic         | 2  | 0 | OUT: 0 |  |
| 1235 |    |                     |    |   |        |  |
|      | 0  | Cytoplasmic         | 0  | 0 | OUT: 0 |  |
| 1244 |    |                     |    |   |        |  |
|      | 0  | Cytoplasmic         | 0  | 0 | OUT: 0 |  |
| 1245 |    |                     |    |   |        |  |
|      | 0  | CytoplasmicMembrane | 1  | 0 | IN: 6  |  |
| 1246 |    |                     |    |   |        |  |
|      | 0  | Cytoplasmic         | 2  | 0 | OUT: 0 |  |

|      |                                                                                     |                                                                                     |                                                                                       |                                                                                       |                                                                                       |                                                                                       |
|------|-------------------------------------------------------------------------------------|-------------------------------------------------------------------------------------|---------------------------------------------------------------------------------------|---------------------------------------------------------------------------------------|---------------------------------------------------------------------------------------|---------------------------------------------------------------------------------------|
| 1247 |    |    |    |    |    |    |
|      | 0                                                                                   | Cytoplasmic                                                                         | 0                                                                                     | 0                                                                                     | OUT: 0                                                                                |                                                                                       |
| 1240 |    |    |    |    |    |    |
|      | 0                                                                                   | Unknown                                                                             | 0                                                                                     | 15                                                                                    | OUT: 2                                                                                |                                                                                       |
| 1241 |    |    |    |    |    |    |
|      | 0                                                                                   | Unknown                                                                             | 0                                                                                     | 0                                                                                     | OUT: 0                                                                                |                                                                                       |
| 1242 |    |    |    |    |    |    |
|      | 0                                                                                   | Cytoplasmic                                                                         | 8                                                                                     | 0                                                                                     | OUT: 2                                                                                |                                                                                       |
| 1243 |    |    |    |    |    |    |
|      | 0                                                                                   | Unknown                                                                             | 0                                                                                     | 0                                                                                     | OUT: 0                                                                                |                                                                                       |
| 1255 |    |    |    |    |    |    |
|      | 0                                                                                   | Cytoplasmic                                                                         | 3                                                                                     | 0                                                                                     | OUT: 0                                                                                |                                                                                       |
| 1254 |    |    |    |    |    |    |
|      | 0                                                                                   | Cytoplasmic                                                                         | 3                                                                                     | 0                                                                                     | IN: 0                                                                                 |                                                                                       |
| 1253 |  |  |  |  |  |  |
|      | 0                                                                                   | Cytoplasmic                                                                         | 0                                                                                     | 0                                                                                     | IN: 0                                                                                 |                                                                                       |
| 1252 |  |  |  |  |  |  |
|      | 0                                                                                   | Unknown                                                                             | 0                                                                                     | 0                                                                                     | IN: 1                                                                                 |                                                                                       |
| 1251 |  |  |  |  |  |  |
|      | 0                                                                                   | Cytoplasmic                                                                         | 20                                                                                    | 0                                                                                     | IN: 0                                                                                 |                                                                                       |

|      |    |                         |    |   |        |  |
|------|----|-------------------------|----|---|--------|--|
| 1250 |    |                         |    |   |        |  |
|      | 0  | CytoplasmicMem<br>brane | 0  | 5 | OUT: 5 |  |
| 1249 |    |                         |    |   |        |  |
|      | 0  | Cytoplasmic             | 12 | 0 | IN: 0  |  |
| 1248 |    |                         |    |   |        |  |
|      | 0  | Unknown                 | 0  | 0 | OUT: 0 |  |
| 1263 |    |                         |    |   |        |  |
|      | 0  | CytoplasmicMem<br>brane | 0  | 0 | IN: 8  |  |
| 1262 |    |                         |    |   |        |  |
|      | 0  | Cytoplasmic             | 0  | 0 | OUT: 0 |  |
| 1261 |    |                         |    |   |        |  |
|      | 0  | Cytoplasmic             | 0  | 0 | IN: 1  |  |
| 1260 |    |                         |    |   |        |  |
|      | 10 | Cytoplasmic             | 1  | 0 | OUT: 3 |  |
| 1259 |    |                         |    |   |        |  |
|      | 0  | Cytoplasmic             | 8  | 0 | OUT: 0 |  |
| 1258 |    |                         |    |   |        |  |
|      | 0  | Cytoplasmic             | 1  | 0 | OUT: 2 |  |
| 1257 |    |                         |    |   |        |  |

|      |   |                     |    |    |        |  |
|------|---|---------------------|----|----|--------|--|
|      | 0 | Cytoplasmic         | 25 | 0  | OUT: 0 |  |
| 1256 |   |                     |    |    |        |  |
|      | 0 | Unknown             | 0  | 0  | IN: 1  |  |
| 1270 |   |                     |    |    |        |  |
|      | 0 | Unknown             | 0  | 0  | OUT: 2 |  |
| 1271 |   |                     |    |    |        |  |
|      | 0 | Cytoplasmic         | 0  | 0  | OUT: 0 |  |
| 1268 |   |                     |    |    |        |  |
|      | 5 | Cytoplasmic         | 20 | 0  | OUT: 1 |  |
| 1269 |   |                     |    |    |        |  |
|      | 0 | CytoplasmicMembrane | 9  | 13 | OUT: 5 |  |
| 1266 |   |                     |    |    |        |  |
|      | 0 | Cytoplasmic         | 3  | 0  | OUT: 0 |  |
| 1267 |   |                     |    |    |        |  |
|      | 0 | Cytoplasmic         | 7  | 0  | OUT: 0 |  |
| 1264 |   |                     |    |    |        |  |
|      | 0 | Cytoplasmic         | 0  | 0  | OUT: 0 |  |
| 1265 |   |                     |    |    |        |  |
|      | 0 | Cytoplasmic         | 1  | 0  | OUT: 0 |  |
| 1278 |   |                     |    |    |        |  |

|      |   |                         |   |   |        |  |
|------|---|-------------------------|---|---|--------|--|
|      | 0 | Unknown                 | 0 | 0 | OUT: 1 |  |
| 1279 |   |                         |   |   |        |  |
|      | 0 | CytoplasmicMem<br>brane | 0 | 0 | OUT: 2 |  |
| 1276 |   |                         |   |   |        |  |
|      | 0 | CytoplasmicMem<br>brane | 0 | 0 | OUT: 0 |  |
| 1277 |   |                         |   |   |        |  |
|      | 0 | Cytoplasmic             | 0 | 0 | OUT: 0 |  |
| 1274 |   |                         |   |   |        |  |
|      | 0 | Cytoplasmic             | 7 | 2 | OUT: 1 |  |
| 1275 |   |                         |   |   |        |  |
|      | 0 | Cytoplasmic             | 0 | 0 | OUT: 0 |  |
| 1272 |   |                         |   |   |        |  |
|      | 0 | CytoplasmicMem<br>brane | 0 | 0 | OUT: 0 |  |
| 1273 |   |                         |   |   |        |  |
|      | 0 | Unknown                 | 5 | 0 | OUT: 1 |  |
| 1153 |   |                         |   |   |        |  |
|      | 0 | Cytoplasmic             | 2 | 0 | OUT: 0 |  |
| 1152 |   |                         |   |   |        |  |
|      |   |                         |   |   |        |  |

|      |    |                     |    |   |        |  |
|------|----|---------------------|----|---|--------|--|
|      | 25 | Cytoplasmic         | 28 | 0 | OUT: 0 |  |
| 1155 |    |                     |    |   |        |  |
|      | 0  | Cytoplasmic         | 1  | 0 | OUT: 0 |  |
| 1154 |    |                     |    |   |        |  |
|      | 0  | Unknown             | 1  | 0 | OUT: 0 |  |
| 1157 |    |                     |    |   |        |  |
|      | 0  | Cytoplasmic         | 0  | 0 | OUT: 0 |  |
| 1156 |    |                     |    |   |        |  |
|      | 0  | CytoplasmicMembrane | 0  | 0 | OUT: 6 |  |
| 1159 |    |                     |    |   |        |  |
|      | 0  | Cytoplasmic         | 0  | 3 | IN: 1  |  |
| 1158 |    |                     |    |   |        |  |
|      | 0  | Cytoplasmic         | 1  | 0 | OUT: 0 |  |
| 1161 |    |                     |    |   |        |  |
|      | 0  | Cytoplasmic         | 17 | 0 | OUT: 0 |  |
| 1160 |    |                     |    |   |        |  |
|      | 0  | CytoplasmicMembrane | 2  | 1 | IN: 9  |  |
| 1163 |    |                     |    |   |        |  |
|      | 0  | Cytoplasmic         | 0  | 0 | OUT: 0 |  |



|      |    |                     |    |    |        |  |
|------|----|---------------------|----|----|--------|--|
| 1162 |    |                     |    |    |        |  |
|      | 0  | Cytoplasmic         | 2  | 2  | OUT: 0 |  |
| 1165 |    |                     |    |    |        |  |
|      | 0  | Unknown             | 1  | 0  | OUT: 0 |  |
| 1164 |    |                     |    |    |        |  |
|      | 0  | CytoplasmicMembrane | 0  | 5  | IN: 3  |  |
| 1167 |    |                     |    |    |        |  |
|      | 10 | Cytoplasmic         | 3  | 0  | OUT: 0 |  |
| 1166 |    |                     |    |    |        |  |
|      | 0  | Cytoplasmic         | 1  | 0  | IN: 0  |  |
| 1168 |    |                     |    |    |        |  |
|      | 0  | CytoplasmicMembrane | 0  | 0  | OUT: 6 |  |
| 1169 |    |                     |    |    |        |  |
|      | 2  | Cytoplasmic         | 18 | 17 | OUT: 0 |  |
| 1170 |    |                     |    |    |        |  |
|      | 0  | Cytoplasmic         | 0  | 0  | IN: 1  |  |
| 1171 |    |                     |    |    |        |  |
|      | 7  | Cytoplasmic         | 3  | 0  | OUT: 0 |  |
| 1172 |    |                     |    |    |        |  |
|      |    |                     |    |    |        |  |

|      |    |                     |    |   |        |  |
|------|----|---------------------|----|---|--------|--|
|      | 0  | Cytoplasmic         | 19 | 0 | OUT: 2 |  |
| 1173 |    |                     |    |   |        |  |
|      | 0  | CytoplasmicMembrane | 1  | 1 | OUT: 2 |  |
| 1174 |    |                     |    |   |        |  |
|      | 0  | Unknown             | 0  | 0 | IN: 1  |  |
| 1175 |    |                     |    |   |        |  |
|      | 22 | Extracellular       | 8  | 0 | IN: 0  |  |
| 1176 |    |                     |    |   |        |  |
|      | 23 | Unknown             | 6  | 2 | OUT: 0 |  |
| 1177 |    |                     |    |   |        |  |
|      | 3  | Cytoplasmic         | 7  | 0 | OUT: 0 |  |
| 1178 |    |                     |    |   |        |  |
|      | 0  | Unknown             | 1  | 0 | OUT: 0 |  |
| 1179 |    |                     |    |   |        |  |
|      | 0  | CytoplasmicMembrane | 0  | 0 | IN: 2  |  |
| 1180 |    |                     |    |   |        |  |
|      | 0  | Unknown             | 0  | 3 | IN: 3  |  |
| 1181 |    |                     |    |   |        |  |
|      | 0  | Unknown             | 0  | 0 | IN: 0  |  |

|      |   |               |    |   |        |  |
|------|---|---------------|----|---|--------|--|
| 1182 |   |               |    |   |        |  |
|      | 0 | Unknown       | 0  | 0 | OUT: 0 |  |
| 1183 |   |               |    |   |        |  |
|      | 0 | Cytoplasmic   | 0  | 1 | OUT: 1 |  |
| 1187 |   |               |    |   |        |  |
|      | 0 | Unknown       | 3  | 0 | OUT: 2 |  |
| 1186 |   |               |    |   |        |  |
|      | 0 | Cytoplasmic   | 22 | 0 | OUT: 1 |  |
| 1185 |   |               |    |   |        |  |
|      | 0 | Cytoplasmic   | 2  | 0 | OUT: 0 |  |
| 1184 |   |               |    |   |        |  |
|      | 0 | OuterMembrane | 1  | 1 | OUT: 0 |  |
| 1191 |   |               |    |   |        |  |
|      | 0 | Cytoplasmic   | 0  | 0 | OUT: 0 |  |
| 1190 |   |               |    |   |        |  |
|      | 0 | Unknown       | 0  | 0 | OUT: 0 |  |
| 1189 |   |               |    |   |        |  |
|      | 0 | Unknown       | 1  | 0 | IN: 1  |  |
| 1188 |   |               |    |   |        |  |
|      | 0 | Cytoplasmic   | 8  | 0 | OUT: 1 |  |

|      |   |                     |    |   |        |  |
|------|---|---------------------|----|---|--------|--|
| 1195 |   |                     |    |   |        |  |
|      | 0 | Cytoplasmic         | 0  | 0 | OUT: 0 |  |
| 1194 |   |                     |    |   |        |  |
|      | 0 | Cytoplasmic         | 1  | 0 | OUT: 0 |  |
| 1193 |   |                     |    |   |        |  |
|      | 0 | Cytoplasmic         | 17 | 0 | OUT: 0 |  |
| 1192 |   |                     |    |   |        |  |
|      | 0 | Unknown             | 0  | 0 | OUT: 0 |  |
| 1199 |   |                     |    |   |        |  |
|      | 0 | Cytoplasmic         | 0  | 0 | OUT: 0 |  |
| 1198 |   |                     |    |   |        |  |
|      | 0 | CytoplasmicMembrane | 0  | 0 | OUT: 4 |  |
| 1197 |   |                     |    |   |        |  |
|      | 0 | Cytoplasmic         | 8  | 0 | OUT: 0 |  |
| 1196 |   |                     |    |   |        |  |
|      | 0 | Cytoplasmic         | 1  | 0 | IN: 0  |  |
| 1202 |   |                     |    |   |        |  |
|      | 0 | OuterMembrane       | 0  | 0 | IN: 1  |  |
| 1203 |   |                     |    |   |        |  |
|      | 0 | CytoplasmicMem      | 2  | 0 | OUT: 7 |  |

|      |   | brane         |   |   |        |  |
|------|---|---------------|---|---|--------|--|
| 1200 |   |               |   |   |        |  |
|      | 0 | Cytoplasmic   | 0 | 0 | OUT: 0 |  |
| 1201 |   |               |   |   |        |  |
|      | 0 | Cytoplasmic   | 0 | 0 | IN: 1  |  |
| 1206 |   |               |   |   |        |  |
|      | 0 | Cytoplasmic   | 0 | 1 | IN: 0  |  |
| 1207 |   |               |   |   |        |  |
|      | 0 | Cytoplasmic   | 0 | 0 | OUT: 0 |  |
| 1204 |   |               |   |   |        |  |
|      | 0 | Extracellular | 1 | 0 | OUT: 0 |  |
| 1205 |   |               |   |   |        |  |
|      | 0 | Unknown       | 0 | 0 | IN: 1  |  |
| 1210 |   |               |   |   |        |  |
|      | 0 | Unknown       | 0 | 0 | OUT: 1 |  |
| 1211 |   |               |   |   |        |  |
|      | 0 | Cytoplasmic   | 0 | 3 | IN: 3  |  |
| 1208 |   |               |   |   |        |  |
|      | 0 | OuterMembrane | 0 | 4 | OUT: 0 |  |
| 1209 |   |               |   |   |        |  |
|      |   |               |   |   |        |  |

|      |   |                         |   |   |         |  |
|------|---|-------------------------|---|---|---------|--|
|      | 0 | CytoplasmicMem<br>brane | 1 | 1 | OUT: 7  |  |
| 1214 |   |                         |   |   |         |  |
|      | 0 | Cytoplasmic             | 2 | 0 | IN: 3   |  |
| 1215 |   |                         |   |   |         |  |
|      | 0 | CytoplasmicMem<br>brane | 0 | 0 | OUT: 11 |  |
| 1212 |   |                         |   |   |         |  |
|      | 0 | Unknown                 | 0 | 0 | OUT: 0  |  |
| 1213 |   |                         |   |   |         |  |
|      | 0 | CytoplasmicMem<br>brane | 0 | 0 | OUT: 2  |  |
| 1375 |   |                         |   |   |         |  |
|      | 0 | Unknown                 | 1 | 0 | OUT: 0  |  |
| 1374 |   |                         |   |   |         |  |
|      | 0 | Unknown                 | 1 | 0 | OUT: 0  |  |
| 1373 |   |                         |   |   |         |  |
|      | 0 | Unknown                 | 0 | 0 | OUT: 0  |  |
| 1372 |   |                         |   |   |         |  |
|      | 0 | CytoplasmicMem<br>brane | 0 | 0 | IN: 6   |  |
| 1371 |   |                         |   |   |         |  |

|      |   |             |    |   |        |  |
|------|---|-------------|----|---|--------|--|
|      | 0 | Cytoplasmic | 0  | 0 | OUT: 0 |  |
| 1370 |   |             |    |   |        |  |
|      | 0 | Cytoplasmic | 25 | 0 | IN: 0  |  |
| 1369 |   |             |    |   |        |  |
|      | 0 | Cytoplasmic | 0  | 0 | OUT: 0 |  |
| 1368 |   |             |    |   |        |  |
|      | 0 | Unknown     | 0  | 0 | OUT: 0 |  |
| 1367 |   |             |    |   |        |  |
|      | 0 | Unknown     | 0  | 0 | IN: 1  |  |
| 1366 |   |             |    |   |        |  |
|      | 0 | Cytoplasmic | 0  | 0 | IN: 0  |  |
| 1365 |   |             |    |   |        |  |
|      | 0 | Cytoplasmic | 0  | 0 | OUT: 0 |  |
| 1364 |   |             |    |   |        |  |
|      | 0 | Cytoplasmic | 8  | 0 | OUT: 1 |  |
| 1363 |   |             |    |   |        |  |
|      | 0 | Cytoplasmic | 0  | 0 | OUT: 0 |  |
| 1362 |   |             |    |   |        |  |
|      | 0 | Unknown     | 0  | 0 | IN: 1  |  |
| 1361 |   |             |    |   |        |  |
|      |   |             |    |   |        |  |

|      |    |                     |    |   |        |  |
|------|----|---------------------|----|---|--------|--|
|      | 0  | CytoplasmicMembrane | 0  | 0 | OUT: 7 |  |
| 1360 |    |                     |    |   |        |  |
|      | 0  | Cytoplasmic         | 0  | 0 | OUT: 0 |  |
| 1358 |    |                     |    |   |        |  |
|      | 0  | Cytoplasmic         | 12 | 4 | OUT: 0 |  |
| 1359 |    |                     |    |   |        |  |
|      | 0  | OuterMembrane       | 1  | 3 | IN: 1  |  |
| 1356 |    |                     |    |   |        |  |
|      | 0  | Cytoplasmic         | 1  | 4 | OUT: 0 |  |
| 1357 |    |                     |    |   |        |  |
|      | 0  | Cytoplasmic         | 11 | 0 | OUT: 0 |  |
| 1354 |    |                     |    |   |        |  |
|      | 0  | OuterMembrane       | 1  | 0 | IN: 1  |  |
| 1355 |    |                     |    |   |        |  |
|      | 0  | Unknown             | 0  | 0 | OUT: 0 |  |
| 1352 |    |                     |    |   |        |  |
|      | 0  | Unknown             | 0  | 0 | IN: 1  |  |
| 1353 |    |                     |    |   |        |  |
|      | 13 | Cytoplasmic         | 0  | 0 | OUT: 0 |  |
| 1350 |    |                     |    |   |        |  |



|      |   |                         |    |   |        |   |
|------|---|-------------------------|----|---|--------|---|
|      | 0 | CytoplasmicMem<br>brane | 1  | 0 | OUT: 6 |   |
| 1351 |   |                         |    |   |        |   |
|      | 0 | Cytoplasmic             | 17 | 0 | OUT: 2 |   |
| 1348 |   |                         |    |   |        |   |
|      | 0 | CytoplasmicMem<br>brane | 1  | 0 | IN: 2  |   |
| 1349 |   |                         |    |   |        |   |
|      | 0 | Cytoplasmic             | 4  | 0 | OUT: 0 |   |
| 1346 |   |                         |    |   |        |   |
|      | 0 | CytoplasmicMem<br>brane | 0  | 0 | IN: 5  |   |
| 1347 |   |                         |    |   |        |   |
|      | 0 | CytoplasmicMem<br>brane | 1  | 0 | IN: 4  |   |
| 1344 |   |                         |    |   |        |   |
|      | 0 | Unknown                 | 1  | 0 | OUT: 0 |   |
| 1345 |   |                         |    |   |        |   |
|      | 0 | Unknown                 | 0  | 0 | OUT: 0 |   |
| 1405 |   |                         |    |   |        |   |
|      | 0 | CytoplasmicMem<br>brane | 0  | 0 | OUT: 8 |   |
|      | . | .                       | .  | . | .      | . |

|      |    |                     |    |   |        |  |
|------|----|---------------------|----|---|--------|--|
| 1404 | 0  | Cytoplasmic         | 25 | 0 | IN: 0  |  |
| 1407 |    |                     |    |   |        |  |
|      | 0  | Cytoplasmic         | 0  | 0 | OUT: 0 |  |
| 1406 |    |                     |    |   |        |  |
|      | 8  | Cytoplasmic         | 0  | 0 | IN: 1  |  |
| 1401 |    |                     |    |   |        |  |
|      | 0  | CytoplasmicMembrane | 0  | 3 | OUT: 0 |  |
| 1400 |    |                     |    |   |        |  |
|      | 0  | Cytoplasmic         | 1  | 0 | OUT: 0 |  |
| 1403 |    |                     |    |   |        |  |
|      | 0  | Cytoplasmic         | 1  | 0 | OUT: 0 |  |
| 1402 |    |                     |    |   |        |  |
|      | 0  | Cytoplasmic         | 0  | 0 | OUT: 0 |  |
| 1397 |    |                     |    |   |        |  |
|      | 35 | Cytoplasmic         | 1  | 0 | OUT: 0 |  |
| 1396 |    |                     |    |   |        |  |
|      | 0  | CytoplasmicMembrane | 25 | 9 | OUT: 0 |  |
| 1399 |    |                     |    |   |        |  |
|      | 0  | Cytoplasmic         | 1  | 0 | OUT: 0 |  |

|      |   |             |    |    |        |  |
|------|---|-------------|----|----|--------|--|
| 1398 |   |             |    |    |        |  |
|      | 0 | Unknown     | 0  | 0  | OUT: 0 |  |
| 1393 |   |             |    |    |        |  |
|      | 0 | Unknown     | 0  | 15 | OUT: 0 |  |
| 1392 |   |             |    |    |        |  |
|      | 0 | Cytoplasmic | 0  | 0  | OUT: 0 |  |
| 1395 |   |             |    |    |        |  |
|      | 4 | Cytoplasmic | 6  | 1  | OUT: 0 |  |
| 1394 |   |             |    |    |        |  |
|      | 0 | Cytoplasmic | 1  | 0  | OUT: 0 |  |
| 1388 |   |             |    |    |        |  |
|      | 0 | Cytoplasmic | 0  | 0  | OUT: 0 |  |
| 1389 |   |             |    |    |        |  |
|      | 0 | Cytoplasmic | 24 | 0  | IN: 1  |  |
| 1390 |   |             |    |    |        |  |
|      | 0 | Cytoplasmic | 26 | 0  | OUT: 0 |  |
| 1391 |   |             |    |    |        |  |
|      | 0 | Cytoplasmic | 0  | 0  | OUT: 1 |  |
| 1384 |   |             |    |    |        |  |
|      | 0 | Unknown     | 1  | 0  | OUT: 0 |  |

|      |   |                     |    |   |         |  |
|------|---|---------------------|----|---|---------|--|
| 1385 |   |                     |    |   |         |  |
|      | 0 | Cytoplasmic         | 0  | 0 | IN: 0   |  |
| 1386 |   |                     |    |   |         |  |
|      | 0 | OuterMembrane       | 1  | 0 | OUT: 0  |  |
| 1387 |   |                     |    |   |         |  |
|      | 0 | Cytoplasmic         | 17 | 0 | IN: 1   |  |
| 1380 |   |                     |    |   |         |  |
|      | 0 | CytoplasmicMembrane | 0  | 0 | OUT: 2  |  |
| 1381 |   |                     |    |   |         |  |
|      | 0 | Cytoplasmic         | 11 | 0 | OUT: 0  |  |
| 1382 |   |                     |    |   |         |  |
|      | 0 | Unknown             | 0  | 0 | OUT: 2  |  |
| 1383 |   |                     |    |   |         |  |
|      | 0 | CytoplasmicMembrane | 0  | 0 | IN: 4   |  |
| 1376 |   |                     |    |   |         |  |
|      | 0 | CytoplasmicMembrane | 1  | 0 | OUT: 11 |  |
| 1377 |   |                     |    |   |         |  |
|      | 0 | CytoplasmicMembrane | 0  | 0 | OUT: 3  |  |

|      |   |                     |   |    |        |  |
|------|---|---------------------|---|----|--------|--|
| 1378 |   |                     |   |    |        |  |
|      | 0 | Unknown             | 0 | 15 | OUT: 2 |  |
| 1379 |   |                     |   |    |        |  |
|      | 0 | CytoplasmicMembrane | 1 | 6  | IN: 1  |  |
| 1307 |   |                     |   |    |        |  |
|      | 0 | Cytoplasmic         | 0 | 0  | IN: 0  |  |
| 1306 |   |                     |   |    |        |  |
|      | 0 | Unknown             | 0 | 0  | IN: 0  |  |
| 1305 |   |                     |   |    |        |  |
|      | 0 | Cytoplasmic         | 0 | 7  | IN: 1  |  |
| 1304 |   |                     |   |    |        |  |
|      | 0 | Cytoplasmic         | 0 | 0  | OUT: 2 |  |
| 1311 |   |                     |   |    |        |  |
|      | 0 | Cytoplasmic         | 0 | 0  | OUT: 1 |  |
| 1310 |   |                     |   |    |        |  |
|      | 0 | Unknown             | 0 | 0  | OUT: 0 |  |
| 1309 |   |                     |   |    |        |  |
|      | 0 | CytoplasmicMembrane | 1 | 0  | IN: 1  |  |
| 1308 |   |                     |   |    |        |  |

|      |   |                     |    |   |        |  |
|------|---|---------------------|----|---|--------|--|
|      | 0 | Cytoplasmic         | 0  | 0 | OUT: 0 |  |
| 1299 |   |                     |    |   |        |  |
|      | 0 | CytoplasmicMembrane | 0  | 7 | OUT: 0 |  |
| 1298 |   |                     |    |   |        |  |
|      | 0 | Cytoplasmic         | 0  | 0 | OUT: 0 |  |
| 1297 |   |                     |    |   |        |  |
|      | 0 | Cytoplasmic         | 4  | 0 | IN: 1  |  |
| 1296 |   |                     |    |   |        |  |
|      | 0 | Cytoplasmic         | 19 | 0 | OUT: 1 |  |
| 1303 |   |                     |    |   |        |  |
|      | 0 | Unknown             | 0  | 0 | OUT: 2 |  |
| 1302 |   |                     |    |   |        |  |
|      | 0 | Unknown             | 0  | 0 | OUT: 0 |  |
| 1301 |   |                     |    |   |        |  |
|      | 0 | OuterMembrane       | 1  | 0 | OUT: 2 |  |
| 1300 |   |                     |    |   |        |  |
|      | 0 | Cytoplasmic         | 1  | 0 | IN: 1  |  |
| 1290 |   |                     |    |   |        |  |
|      | 0 | Cytoplasmic         | 0  | 0 | OUT: 2 |  |
| 1291 |   |                     |    |   |        |  |

|      |    |                     |   |   |        |  |
|------|----|---------------------|---|---|--------|--|
|      | 0  | Cytoplasmic         | 3 | 0 | IN: 1  |  |
| 1288 |    |                     |   |   |        |  |
|      | 0  | CytoplasmicMembrane | 0 | 0 | OUT: 4 |  |
| 1289 |    |                     |   |   |        |  |
|      | 0  | Unknown             | 0 | 0 | OUT: 0 |  |
| 1294 |    |                     |   |   |        |  |
|      | 0  | Unknown             | 1 | 0 | OUT: 0 |  |
| 1295 |    |                     |   |   |        |  |
|      | 17 | Cytoplasmic         | 5 | 0 | IN: 1  |  |
| 1292 |    |                     |   |   |        |  |
|      | 0  | Unknown             | 0 | 0 | OUT: 2 |  |
| 1293 |    |                     |   |   |        |  |
|      | 0  | Unknown             | 0 | 0 | IN: 1  |  |
| 1282 |    |                     |   |   |        |  |
|      | 0  | Cytoplasmic         | 0 | 1 | OUT: 0 |  |
| 1283 |    |                     |   |   |        |  |
|      | 0  | CytoplasmicMembrane | 0 | 5 | IN: 2  |  |
| 1280 |    |                     |   |   |        |  |
|      | 0  | Cytoplasmic         | 1 | 0 | OUT: 0 |  |

|      |   |                         |   |   |        |  |
|------|---|-------------------------|---|---|--------|--|
| 1281 |   |                         |   |   |        |  |
|      | 0 | Cytoplasmic             | 0 | 0 | OUT: 0 |  |
| 1286 |   |                         |   |   |        |  |
|      | 0 | Unknown                 | 0 | 0 | IN: 2  |  |
| 1287 |   |                         |   |   |        |  |
|      | 0 | Cytoplasmic             | 0 | 0 | OUT: 0 |  |
| 1284 |   |                         |   |   |        |  |
|      | 0 | Cytoplasmic             | 0 | 0 | OUT: 0 |  |
| 1285 |   |                         |   |   |        |  |
|      | 0 | Cytoplasmic             | 0 | 0 | OUT: 0 |  |
| 1337 |   |                         |   |   |        |  |
|      | 0 | Unknown                 | 1 | 0 | OUT: 0 |  |
| 1336 |   |                         |   |   |        |  |
|      | 0 | Cytoplasmic             | 6 | 0 | OUT: 0 |  |
| 1339 |   |                         |   |   |        |  |
|      | 0 | CytoplasmicMem<br>brane | 0 | 0 | IN: 12 |  |
| 1338 |   |                         |   |   |        |  |
|      | 0 | Extracellular           | 0 | 4 | OUT: 0 |  |
| 1341 |   |                         |   |   |        |  |
|      | 0 | CytoplasmicMem          | 0 | 0 | OUT: 5 |  |



|      |    |                         |    |   |        |  |
|------|----|-------------------------|----|---|--------|--|
|      |    | brane                   |    |   |        |  |
| 1340 |    |                         |    |   |        |  |
|      | 0  | Cytoplasmic             | 0  | 2 | OUT: 0 |  |
| 1343 |    |                         |    |   |        |  |
|      | 0  | CytoplasmicMem<br>brane | 0  | 0 | IN: 1  |  |
| 1342 |    |                         |    |   |        |  |
|      | 0  | Unknown                 | 0  | 0 | OUT: 0 |  |
| 1329 |    |                         |    |   |        |  |
|      | 0  | CytoplasmicMem<br>brane | 0  | 0 | OUT: 5 |  |
| 1328 |    |                         |    |   |        |  |
|      | 0  | Unknown                 | 0  | 0 | OUT: 0 |  |
| 1331 |    |                         |    |   |        |  |
|      | 0  | Cytoplasmic             | 3  | 0 | OUT: 0 |  |
| 1330 |    |                         |    |   |        |  |
|      | 97 | Cytoplasmic             | 25 | 6 | IN: 0  |  |
| 1333 |    |                         |    |   |        |  |
|      | 0  | Cytoplasmic             | 1  | 0 | IN: 0  |  |
| 1332 |    |                         |    |   |        |  |
|      | 0  | Unknown                 | 0  | 0 | OUT: 0 |  |

|      |                                                                                     |                                                                                     |                                                                                       |                                                                                       |                                                                                       |                                                                                       |
|------|-------------------------------------------------------------------------------------|-------------------------------------------------------------------------------------|---------------------------------------------------------------------------------------|---------------------------------------------------------------------------------------|---------------------------------------------------------------------------------------|---------------------------------------------------------------------------------------|
| 1335 |    |    |    |    |    |    |
|      | 0                                                                                   | Cytoplasmic                                                                         | 0                                                                                     | 0                                                                                     | OUT: 0                                                                                |                                                                                       |
| 1334 |    |    |    |    |    |    |
|      | 0                                                                                   | Unknown                                                                             | 0                                                                                     | 0                                                                                     | OUT: 0                                                                                |                                                                                       |
| 1320 |    |    |    |    |    |    |
|      | 0                                                                                   | CytoplasmicMem<br>brane                                                             | 0                                                                                     | 0                                                                                     | OUT: 0                                                                                |                                                                                       |
| 1321 |    |    |    |    |    |    |
|      | 0                                                                                   | CytoplasmicMem<br>brane                                                             | 1                                                                                     | 0                                                                                     | OUT: 4                                                                                |                                                                                       |
| 1322 |    |    |    |    |    |    |
|      | 0                                                                                   | Cytoplasmic                                                                         | 14                                                                                    | 3                                                                                     | OUT: 0                                                                                |                                                                                       |
| 1323 |    |    |    |    |    |    |
|      | 0                                                                                   | Cytoplasmic                                                                         | 0                                                                                     | 0                                                                                     | IN: 1                                                                                 |                                                                                       |
| 1324 |  |  |  |  |  |  |
|      | 39                                                                                  | Cytoplasmic                                                                         | 25                                                                                    | 1                                                                                     | OUT: 0                                                                                |                                                                                       |
| 1325 |  |  |  |  |  |  |
|      | 0                                                                                   | Cytoplasmic                                                                         | 3                                                                                     | 0                                                                                     | OUT: 0                                                                                |                                                                                       |
| 1326 |  |  |  |  |  |  |
|      | 0                                                                                   | Unknown                                                                             | 0                                                                                     | 0                                                                                     | IN: 1                                                                                 |                                                                                       |
| 1327 |  |  |  |  |  |  |
|      |                                                                                     |                                                                                     |                                                                                       |                                                                                       |                                                                                       |                                                                                       |

|      |    |                     |    |   |        |  |
|------|----|---------------------|----|---|--------|--|
|      | 0  | Cytoplasmic         | 1  | 0 | OUT: 0 |  |
| 1312 |    |                     |    |   |        |  |
|      | 0  | Cytoplasmic         | 0  | 0 | OUT: 0 |  |
| 1313 |    |                     |    |   |        |  |
|      | 0  | Unknown             | 0  | 0 | OUT: 0 |  |
| 1314 |    |                     |    |   |        |  |
|      | 0  | Cytoplasmic         | 0  | 0 | OUT: 0 |  |
| 1315 |    |                     |    |   |        |  |
|      | 0  | Cytoplasmic         | 27 | 0 | OUT: 1 |  |
| 1316 |    |                     |    |   |        |  |
|      | 0  | CytoplasmicMembrane | 0  | 0 | IN: 2  |  |
| 1317 |    |                     |    |   |        |  |
|      | 0  | Unknown             | 1  | 0 | IN: 1  |  |
| 1318 |    |                     |    |   |        |  |
|      | 0  | Cytoplasmic         | 0  | 0 | OUT: 0 |  |
| 1319 |    |                     |    |   |        |  |
|      | 22 | Cytoplasmic         | 0  | 5 | OUT: 0 |  |
| 1494 |    |                     |    |   |        |  |
|      | 0  | Cytoplasmic         | 10 | 0 | OUT: 0 |  |
| 1495 |    |                     |    |   |        |  |

|      |    |                         |    |   |        |  |
|------|----|-------------------------|----|---|--------|--|
|      | 0  | Cytoplasmic             | 2  | 0 | OUT: 0 |  |
| 1492 |    |                         |    |   |        |  |
|      | 0  | Cytoplasmic             | 1  | 0 | OUT: 0 |  |
| 1493 |    |                         |    |   |        |  |
|      | 0  | Cytoplasmic             | 0  | 0 | OUT: 0 |  |
| 1490 |    |                         |    |   |        |  |
|      | 0  | Cytoplasmic             | 0  | 0 | OUT: 0 |  |
| 1491 |    |                         |    |   |        |  |
|      | 10 | Cytoplasmic             | 24 | 0 | OUT: 0 |  |
| 1488 |    |                         |    |   |        |  |
|      | 0  | Cytoplasmic             | 1  | 0 | IN: 2  |  |
| 1489 |    |                         |    |   |        |  |
|      | 0  | CytoplasmicMem<br>brane | 0  | 0 | IN: 1  |  |
| 1502 |    |                         |    |   |        |  |
|      | 0  | Cytoplasmic             | 16 | 0 | OUT: 1 |  |
| 1503 |    |                         |    |   |        |  |
|      | 0  | Cytoplasmic             | 0  | 0 | OUT: 0 |  |
| 1500 |    |                         |    |   |        |  |
|      | 0  | CytoplasmicMem<br>brane | 0  | 0 | OUT: 1 |  |

|      |   |                         |    |   |        |  |
|------|---|-------------------------|----|---|--------|--|
| 1501 |   |                         |    |   |        |  |
|      | 0 | Unknown                 | 0  | 0 | IN: 0  |  |
| 1498 |   |                         |    |   |        |  |
|      | 0 | Cytoplasmic             | 2  | 0 | IN: 0  |  |
| 1499 |   |                         |    |   |        |  |
|      | 0 | Unknown                 | 1  | 0 | OUT: 0 |  |
| 1496 |   |                         |    |   |        |  |
|      | 0 | Cytoplasmic             | 3  | 0 | OUT: 1 |  |
| 1497 |   |                         |    |   |        |  |
|      | 8 | Cytoplasmic             | 25 | 0 | OUT: 0 |  |
| 1479 |   |                         |    |   |        |  |
|      | 0 | Cytoplasmic             | 5  | 0 | OUT: 0 |  |
| 1478 |   |                         |    |   |        |  |
|      | 0 | CytoplasmicMem<br>brane | 1  | 1 | OUT: 1 |  |
| 1477 |   |                         |    |   |        |  |
|      | 0 | Cytoplasmic             | 0  | 0 | OUT: 0 |  |
| 1476 |   |                         |    |   |        |  |
|      | 0 | Cytoplasmic             | 0  | 0 | OUT: 1 |  |
| 1475 |   |                         |    |   |        |  |
|      | 0 | Cytoplasmic             | 0  | 0 | OUT: 0 |  |

|      |   |                     |   |    |        |   |
|------|---|---------------------|---|----|--------|---|
| 1474 |   |                     |   |    |        |   |
|      | 0 | Unknown             | 0 | 0  | OUT: 0 |   |
| 1473 |   |                     |   |    |        |   |
|      | 0 | Unknown             | 1 | 3  | OUT: 1 |   |
| 1472 |   |                     |   |    |        |   |
|      | 0 | Unknown             | 0 | 0  | IN: 0  |   |
| 1487 |   |                     |   |    |        |   |
|      | 0 | Cytoplasmic         | 0 | 0  | OUT: 0 |   |
| 1486 |   |                     |   |    |        |   |
|      | 0 | CytoplasmicMembrane | 0 | 0  | IN: 2  |   |
| 1485 |   |                     |   |    |        |   |
|      | 0 | Cytoplasmic         | 0 | 0  | OUT: 2 |   |
| 1484 |   |                     |   |    |        |   |
|      | 0 | OuterMembrane       | 0 | 3  | OUT: 0 |   |
| 1483 |   |                     |   |    |        |   |
|      | 0 | CytoplasmicMembrane | 0 | 0  | IN: 2  |   |
| 1482 |   |                     |   |    |        |   |
|      | 0 | CytoplasmicMembrane | 3 | 19 | IN: 1  |   |
|      | . | .                   | . | .  | .      | . |

|      |   |                     |   |   |        |  |
|------|---|---------------------|---|---|--------|--|
| 1481 | 0 | Cytoplasmic         | 2 | 0 | OUT: 0 |  |
| 1480 |   |                     |   |   |        |  |
|      | 0 | CytoplasmicMembrane | 2 | 2 | OUT: 3 |  |
| 1524 |   |                     |   |   |        |  |
|      | 0 | Unknown             | 0 | 0 | OUT: 0 |  |
| 1525 |   |                     |   |   |        |  |
|      | 0 | Cytoplasmic         | 2 | 0 | OUT: 2 |  |
| 1526 |   |                     |   |   |        |  |
|      | 0 | Cytoplasmic         | 0 | 0 | OUT: 0 |  |
| 1527 |   |                     |   |   |        |  |
|      | 0 | Cytoplasmic         | 0 | 0 | OUT: 0 |  |
| 1520 |   |                     |   |   |        |  |
|      | 0 | Unknown             | 0 | 0 | OUT: 0 |  |
| 1521 |   |                     |   |   |        |  |
|      | 0 | Cytoplasmic         | 1 | 0 | OUT: 0 |  |
| 1522 |   |                     |   |   |        |  |
|      | 0 | CytoplasmicMembrane | 1 | 0 | OUT: 1 |  |
| 1523 |   |                     |   |   |        |  |
|      | 0 | Unknown             | 0 | 0 | OUT: 0 |  |

|      |   |                     |    |    |        |  |
|------|---|---------------------|----|----|--------|--|
| 1532 |   |                     |    |    |        |  |
|      | 0 | Unknown             | 0  | 3  | OUT: 0 |  |
| 1533 |   |                     |    |    |        |  |
|      | 0 | Unknown             | 0  | 0  | OUT: 0 |  |
| 1534 |   |                     |    |    |        |  |
|      | 0 | CytoplasmicMembrane | 1  | 0  | OUT: 1 |  |
| 1535 |   |                     |    |    |        |  |
|      | 0 | Extracellular       | 0  | 22 | OUT: 0 |  |
| 1528 |   |                     |    |    |        |  |
|      | 0 | Cytoplasmic         | 0  | 0  | OUT: 0 |  |
| 1529 |   |                     |    |    |        |  |
|      | 0 | Cytoplasmic         | 0  | 3  | OUT: 0 |  |
| 1530 |   |                     |    |    |        |  |
|      | 3 | Cytoplasmic         | 17 | 0  | OUT: 0 |  |
| 1531 |   |                     |    |    |        |  |
|      | 0 | Unknown             | 0  | 0  | OUT: 2 |  |
| 1509 |   |                     |    |    |        |  |
|      | 0 | Unknown             | 1  | 0  | IN: 0  |  |
| 1508 |   |                     |    |    |        |  |
|      | 0 | CytoplasmicMem      | 1  | 0  | OUT: 8 |  |



|      |   |                         |   |   |        |  |
|------|---|-------------------------|---|---|--------|--|
|      |   | brane                   |   |   |        |  |
| 1511 |   |                         |   |   |        |  |
|      | 0 | CytoplasmicMem<br>brane | 0 | 0 | IN: 12 |  |
| 1510 |   |                         |   |   |        |  |
|      | 0 | CytoplasmicMem<br>brane | 1 | 0 | IN: 5  |  |
| 1505 |   |                         |   |   |        |  |
|      | 0 | Cytoplasmic             | 0 | 0 | OUT: 0 |  |
| 1504 |   |                         |   |   |        |  |
|      | 0 | CytoplasmicMem<br>brane | 0 | 0 | OUT: 4 |  |
| 1507 |   |                         |   |   |        |  |
|      | 0 | Unknown                 | 0 | 0 | OUT: 0 |  |
| 1506 |   |                         |   |   |        |  |
|      | 0 | Unknown                 | 0 | 0 | IN: 0  |  |
| 1517 |   |                         |   |   |        |  |
|      | 0 | Unknown                 | 1 | 0 | OUT: 0 |  |
| 1516 |   |                         |   |   |        |  |
|      | 0 | Cytoplasmic             | 0 | 0 | OUT: 0 |  |
| 1519 |   |                         |   |   |        |  |
|      |   |                         |   |   |        |  |

|      |    |             |    |   |        |  |
|------|----|-------------|----|---|--------|--|
|      | 0  | Unknown     | 0  | 0 | OUT: 1 |  |
| 1518 |    |             |    |   |        |  |
|      | 0  | Cytoplasmic | 1  | 0 | OUT: 0 |  |
| 1513 |    |             |    |   |        |  |
|      | 4  | Cytoplasmic | 10 | 0 | OUT: 0 |  |
| 1512 |    |             |    |   |        |  |
|      | 13 | Cytoplasmic | 14 | 0 | IN: 0  |  |
| 1515 |    |             |    |   |        |  |
|      | 0  | Unknown     | 0  | 0 | IN: 1  |  |
| 1514 |    |             |    |   |        |  |
|      | 4  | Cytoplasmic | 2  | 0 | OUT: 0 |  |
| 1426 |    |             |    |   |        |  |
|      | 21 | Cytoplasmic | 17 | 0 | OUT: 0 |  |
| 1427 |    |             |    |   |        |  |
|      | 0  | Unknown     | 1  | 0 | IN: 0  |  |
| 1424 |    |             |    |   |        |  |
|      | 0  | Cytoplasmic | 0  | 0 | OUT: 0 |  |
| 1425 |    |             |    |   |        |  |
|      | 0  | Cytoplasmic | 0  | 0 | OUT: 0 |  |
| 1430 |    |             |    |   |        |  |
|      |    |             |    |   |        |  |

|      |   |                     |   |   |        |  |
|------|---|---------------------|---|---|--------|--|
|      | 0 | Unknown             | 0 | 0 | IN: 0  |  |
| 1431 |   |                     |   |   |        |  |
|      | 0 | Cytoplasmic         | 0 | 0 | OUT: 0 |  |
| 1428 |   |                     |   |   |        |  |
|      | 0 | Unknown             | 0 | 3 | OUT: 1 |  |
| 1429 |   |                     |   |   |        |  |
|      | 0 | Cytoplasmic         | 0 | 0 | OUT: 0 |  |
| 1434 |   |                     |   |   |        |  |
|      | 0 | CytoplasmicMembrane | 0 | 4 | OUT: 6 |  |
| 1435 |   |                     |   |   |        |  |
|      | 6 | Cytoplasmic         | 4 | 1 | OUT: 0 |  |
| 1432 |   |                     |   |   |        |  |
|      | 0 | Cytoplasmic         | 0 | 0 | OUT: 0 |  |
| 1433 |   |                     |   |   |        |  |
|      | 0 | Unknown             | 0 | 0 | IN: 1  |  |
| 1438 |   |                     |   |   |        |  |
|      | 0 | Cytoplasmic         | 0 | 0 | OUT: 0 |  |
| 1439 |   |                     |   |   |        |  |
|      | 0 | Cytoplasmic         | 0 | 0 | OUT: 0 |  |
| 1436 |   |                     |   |   |        |  |

|      |   |                         |   |   |        |  |
|------|---|-------------------------|---|---|--------|--|
|      | 0 | CytoplasmicMem<br>brane | 1 | 0 | OUT: 3 |  |
| 1437 |   |                         |   |   |        |  |
|      | 0 | Unknown                 | 0 | 0 | OUT: 0 |  |
| 1411 |   |                         |   |   |        |  |
|      | 0 | CytoplasmicMem<br>brane | 0 | 0 | IN: 5  |  |
| 1410 |   |                         |   |   |        |  |
|      | 0 | Unknown                 | 0 | 0 | IN: 1  |  |
| 1409 |   |                         |   |   |        |  |
|      | 0 | Cytoplasmic             | 0 | 0 | OUT: 0 |  |
| 1408 |   |                         |   |   |        |  |
|      | 0 | Cytoplasmic             | 1 | 0 | OUT: 0 |  |
| 1415 |   |                         |   |   |        |  |
|      | 0 | Cytoplasmic             | 1 | 0 | OUT: 0 |  |
| 1414 |   |                         |   |   |        |  |
|      | 0 | CytoplasmicMem<br>brane | 0 | 0 | IN: 3  |  |
| 1413 |   |                         |   |   |        |  |
|      | 0 | CytoplasmicMem<br>brane | 2 | 2 | OUT: 3 |  |
| 1412 |   |                         |   |   |        |  |

|      |   |                         |    |   |        |  |
|------|---|-------------------------|----|---|--------|--|
|      | 0 | Cytoplasmic             | 0  | 0 | IN: 0  |  |
| 1419 |   |                         |    |   |        |  |
|      | 0 | Cytoplasmic             | 5  | 0 | IN: 0  |  |
| 1418 |   |                         |    |   |        |  |
|      | 0 | CytoplasmicMem<br>brane | 1  | 3 | IN: 3  |  |
| 1417 |   |                         |    |   |        |  |
|      | 0 | Cytoplasmic             | 0  | 0 | OUT: 2 |  |
| 1416 |   |                         |    |   |        |  |
|      | 0 | Unknown                 | 0  | 0 | OUT: 0 |  |
| 1423 |   |                         |    |   |        |  |
|      | 0 | Unknown                 | 0  | 0 | IN: 1  |  |
| 1422 |   |                         |    |   |        |  |
|      | 2 | Cytoplasmic             | 13 | 1 | OUT: 0 |  |
| 1421 |   |                         |    |   |        |  |
|      | 0 | Cytoplasmic             | 0  | 0 | OUT: 0 |  |
| 1420 |   |                         |    |   |        |  |
|      | 0 | Cytoplasmic             | 0  | 0 | IN: 0  |  |
| 1456 |   |                         |    |   |        |  |
|      | 0 | CytoplasmicMem<br>brane | 0  | 0 | IN: 10 |  |

|      |   |                         |   |   |        |  |
|------|---|-------------------------|---|---|--------|--|
| 1457 |   |                         |   |   |        |  |
|      | 0 | Cytoplasmic             | 1 | 0 | IN: 0  |  |
| 1458 |   |                         |   |   |        |  |
|      | 0 | Cytoplasmic             | 1 | 0 | OUT: 0 |  |
| 1459 |   |                         |   |   |        |  |
|      | 0 | Unknown                 | 0 | 0 | IN: 1  |  |
| 1460 |   |                         |   |   |        |  |
|      | 0 | Cytoplasmic             | 0 | 3 | OUT: 0 |  |
| 1461 |   |                         |   |   |        |  |
|      | 0 | Unknown                 | 0 | 0 | OUT: 0 |  |
| 1462 |   |                         |   |   |        |  |
|      | 0 | Cytoplasmic             | 1 | 0 | OUT: 0 |  |
| 1463 |   |                         |   |   |        |  |
|      | 0 | Unknown                 | 0 | 0 | OUT: 0 |  |
| 1464 |   |                         |   |   |        |  |
|      | 0 | Cytoplasmic             | 0 | 5 | IN: 0  |  |
| 1465 |   |                         |   |   |        |  |
|      | 0 | CytoplasmicMem<br>brane | 1 | 0 | IN: 8  |  |
| 1466 |   |                         |   |   |        |  |
|      | 0 | CytoplasmicMem          | 0 | 0 | IN: 2  |  |

|      |    | brane               |    |    |        |  |
|------|----|---------------------|----|----|--------|--|
| 1467 |    |                     |    |    |        |  |
|      | 0  | OuterMembrane       | 0  | 15 | IN: 1  |  |
| 1468 |    |                     |    |    |        |  |
|      | 0  | Cytoplasmic         | 0  | 0  | OUT: 2 |  |
| 1469 |    |                     |    |    |        |  |
|      | 0  | Cytoplasmic         | 0  | 0  | OUT: 1 |  |
| 1470 |    |                     |    |    |        |  |
|      | 0  | Cytoplasmic         | 17 | 0  | OUT: 0 |  |
| 1471 |    |                     |    |    |        |  |
|      | 0  | Unknown             | 0  | 0  | OUT: 0 |  |
| 1441 |    |                     |    |    |        |  |
|      | 0  | CytoplasmicMembrane | 1  | 0  | IN: 9  |  |
| 1440 |    |                     |    |    |        |  |
|      | 10 | Cytoplasmic         | 9  | 0  | OUT: 0 |  |
| 1443 |    |                     |    |    |        |  |
|      | 0  | Cytoplasmic         | 0  | 0  | OUT: 0 |  |
| 1442 |    |                     |    |    |        |  |
|      | 0  | CytoplasmicMembrane | 1  | 0  | OUT: 6 |  |

|      |   |                         |    |   |        |  |
|------|---|-------------------------|----|---|--------|--|
| 1445 |   |                         |    |   |        |  |
|      | 0 | Unknown                 | 0  | 0 | OUT: 0 |  |
| 1444 |   |                         |    |   |        |  |
|      | 0 | Cytoplasmic             | 9  | 0 | OUT: 3 |  |
| 1447 |   |                         |    |   |        |  |
|      | 0 | Unknown                 | 0  | 0 | IN: 1  |  |
| 1446 |   |                         |    |   |        |  |
|      | 0 | Cytoplasmic             | 1  | 0 | OUT: 0 |  |
| 1449 |   |                         |    |   |        |  |
|      | 0 | Cytoplasmic             | 40 | 0 | OUT: 0 |  |
| 1448 |   |                         |    |   |        |  |
|      | 0 | CytoplasmicMem<br>brane | 0  | 0 | OUT: 0 |  |
| 1451 |   |                         |    |   |        |  |
|      | 0 | Unknown                 | 0  | 0 | IN: 0  |  |
| 1450 |   |                         |    |   |        |  |
|      | 0 | Unknown                 | 0  | 0 | OUT: 0 |  |
| 1453 |   |                         |    |   |        |  |
|      | 0 | Cytoplasmic             | 2  | 0 | OUT: 0 |  |
| 1452 |   |                         |    |   |        |  |
|      | 0 | Cytoplasmic             | 0  | 0 | IN: 0  |  |



|      |    |                         |    |     |        |  |
|------|----|-------------------------|----|-----|--------|--|
| 1455 |    |                         |    |     |        |  |
|      | 0  | Cytoplasmic             | 0  | 0   | IN: 0  |  |
| 1454 |    |                         |    |     |        |  |
|      | 0  | Unknown                 | 0  | 0   | IN: 1  |  |
| 1576 |    |                         |    |     |        |  |
|      | 0  | Unknown                 | 0  | 0   | OUT: 1 |  |
| 1574 |    |                         |    |     |        |  |
|      | 0  | CytoplasmicMem<br>brane | 1  | 0   | IN: 3  |  |
| 1575 |    |                         |    |     |        |  |
|      | 0  | Unknown                 | 17 | 0   | OUT: 1 |  |
| 1572 |    |                         |    |     |        |  |
|      | 0  | Cytoplasmic             | 0  | 0   | OUT: 0 |  |
| 1573 |    |                         |    |     |        |  |
|      | 32 | Cytoplasmic             | 24 | 0   | OUT: 0 |  |
| 1570 |    |                         |    |     |        |  |
|      | 16 | CytoplasmicMem<br>brane | 16 | 113 | OUT: 0 |  |
| 1571 |    |                         |    |     |        |  |
|      | 0  | Cytoplasmic             | 0  | 0   | OUT: 0 |  |
| 1568 |    |                         |    |     |        |  |
|      |    |                         |    |     |        |  |

|      |   |                     |   |   |        |  |
|------|---|---------------------|---|---|--------|--|
|      | 0 | Unknown             | 0 | 0 | IN: 1  |  |
| 1569 |   |                     |   |   |        |  |
|      | 0 | CytoplasmicMembrane | 0 | 0 | IN: 1  |  |
| 1548 |   |                     |   |   |        |  |
|      | 0 | Cytoplasmic         | 1 | 0 | IN: 0  |  |
| 1549 |   |                     |   |   |        |  |
|      | 0 | Unknown             | 0 | 0 | OUT: 0 |  |
| 1550 |   |                     |   |   |        |  |
|      | 0 | Unknown             | 0 | 0 | IN: 1  |  |
| 1551 |   |                     |   |   |        |  |
|      | 0 | Unknown             | 8 | 0 | OUT: 0 |  |
| 1544 |   |                     |   |   |        |  |
|      | 0 | Unknown             | 0 | 0 | OUT: 1 |  |
| 1545 |   |                     |   |   |        |  |
|      | 0 | Cytoplasmic         | 2 | 0 | OUT: 0 |  |
| 1546 |   |                     |   |   |        |  |
|      | 0 | Cytoplasmic         | 0 | 0 | OUT: 0 |  |
| 1547 |   |                     |   |   |        |  |
|      | 0 | Cytoplasmic         | 1 | 0 | IN: 1  |  |
| 1540 |   |                     |   |   |        |  |

|      |   |             |    |   |        |  |
|------|---|-------------|----|---|--------|--|
|      | 0 | Cytoplasmic | 1  | 0 | OUT: 0 |  |
| 1541 |   |             |    |   |        |  |
|      | 0 | Unknown     | 0  | 0 | OUT: 0 |  |
| 1542 |   |             |    |   |        |  |
|      | 0 | Cytoplasmic | 0  | 0 | IN: 2  |  |
| 1543 |   |             |    |   |        |  |
|      | 0 | Unknown     | 1  | 0 | OUT: 1 |  |
| 1536 |   |             |    |   |        |  |
|      | 0 | Cytoplasmic | 20 | 0 | OUT: 0 |  |
| 1537 |   |             |    |   |        |  |
|      | 0 | Cytoplasmic | 0  | 0 | OUT: 0 |  |
| 1538 |   |             |    |   |        |  |
|      | 0 | Cytoplasmic | 2  | 0 | OUT: 0 |  |
| 1539 |   |             |    |   |        |  |
|      | 1 | Cytoplasmic | 2  | 0 | OUT: 0 |  |
| 1565 |   |             |    |   |        |  |
|      | 0 | Unknown     | 0  | 0 | IN: 0  |  |
| 1564 |   |             |    |   |        |  |
|      | 0 | Unknown     | 0  | 0 | OUT: 0 |  |
| 1567 |   |             |    |   |        |  |
|      |   |             |    |   |        |  |

|      |   |                         |   |   |        |  |
|------|---|-------------------------|---|---|--------|--|
|      | 0 | Cytoplasmic             | 0 | 0 | OUT: 0 |  |
| 1566 |   |                         |   |   |        |  |
|      | 0 | Unknown                 | 0 | 0 | OUT: 0 |  |
| 1561 |   |                         |   |   |        |  |
|      | 0 | Cytoplasmic             | 0 | 0 | OUT: 0 |  |
| 1560 |   |                         |   |   |        |  |
|      | 0 | Cytoplasmic             | 0 | 0 | OUT: 0 |  |
| 1563 |   |                         |   |   |        |  |
|      | 0 | CytoplasmicMem<br>brane | 1 | 0 | IN: 3  |  |
| 1562 |   |                         |   |   |        |  |
|      | 0 | CytoplasmicMem<br>brane | 0 | 1 | OUT: 4 |  |
| 1557 |   |                         |   |   |        |  |
|      | 0 | Unknown                 | 1 | 0 | OUT: 1 |  |
| 1556 |   |                         |   |   |        |  |
|      | 0 | Cytoplasmic             | 1 | 0 | OUT: 0 |  |
| 1559 |   |                         |   |   |        |  |
|      | 0 | CytoplasmicMem<br>brane | 0 | 0 | IN: 9  |  |
| 1558 |   |                         |   |   |        |  |
|      |   |                         |   |   |        |  |

|      |                      |                     |                     |                     |                      |                      |
|------|----------------------|---------------------|---------------------|---------------------|----------------------|----------------------|
|      | 0                    | Unknown             | 0                   | 0                   | OUT: 0               |                      |
| 1553 |                      |                     |                     |                     |                      |                      |
|      | 0                    | Cytoplasmic         | 0                   | 0                   | OUT: 0               |                      |
| 1552 |                      |                     |                     |                     |                      |                      |
|      | 0                    | Cytoplasmic         | 0                   | 8                   | OUT: 0               |                      |
| 1555 |                      |                     |                     |                     |                      |                      |
|      | 0                    | CytoplasmicMembrane | 1                   | 0                   | OUT: 18              |                      |
| 1554 |                      |                     |                     |                     |                      |                      |
|      | 0                    | Unknown             | 0                   | 0                   | OUT: 0               |                      |
| 1576 | <a href="#">1452</a> | <a href="#">65</a>  | <a href="#">667</a> | <a href="#">267</a> | <a href="#">1254</a> | <a href="#">1273</a> |

[Prioritized Proteins: 10](#)

### Epitope Analysis

| Seq. Id | B Cell Epitope       | T Cell Epitope | Location | Log Score | Score  | MHC-I Allele Count | MHC-II Allele Count |
|---------|----------------------|----------------|----------|-----------|--------|--------------------|---------------------|
| 3       | WLDGVYDINENNGIKAYYQY | YDINENNGI      | 278      | 3.69      | 40.0   | 7                  | 5                   |
|         | PFVSPFQFILDARYNWRKTT | FVSPFQFIL      | 704      | 4.4       | 81.27  | 24                 | 5                   |
|         |                      | FQFILDARY      | 708      | 4.61      | 100.0  | 18                 | 5                   |
|         |                      | FILDARYNW      | 710      | 172.72    | 172.72 | 4                  | 8                   |
|         | VLTYFNYQRSFVPPQLDVLS | VLTYFNYQR      | 568      | -1.83     | 0.02   | 21                 | 4                   |
|         |                      | YQRSFVPPQ      | 574      | 0.88      | 2.4    | 3                  | 31                  |
|         |                      |                |          |           |        |                    |                     |

|  |                      |           |     |        |        |     |    |
|--|----------------------|-----------|-----|--------|--------|-----|----|
|  |                      | LTYFNYQRS | 569 | 2.58   | 13.2   | 3   | 1  |
|  |                      | YFNYQRSFV | 571 | 119.6  | 119.6  | 12  | 10 |
|  | PSFIKSLGNLLYNTYVRSG  | FIKSLGNNL | 223 | 0.74   | 2.1    | 40  | 6  |
|  |                      | IKSLGNLL  | 224 | 6.21   | 500.0  | 20  | 15 |
|  | DYSGQVNLGYSGITAPKSWQ | YSGQVNLGY | 44  | 1.32   | 3.75   | 50  | 3  |
|  |                      | YSGITAPKS | 52  | 147.09 | 147.09 | 5   | 6  |
|  | SYGGAEYFTQHFDVEAGAR  | FDTVEAGAR | 598 | 149.26 | 149.26 | 6   | 2  |
|  | EAGARYTYKDKFSFNADYFR | YTYKDKFSF | 607 | 0.41   | 1.5    | 63  | 20 |
|  |                      | YKDKFSFNA | 609 | 4.46   | 86.8   | 35  | 4  |
|  | GSRTVISNKALTQQANQSIE | LTQQANQSI | 81  | 1.93   | 6.92   | 40  | 1  |
|  | APKSWQDEEVKKYTGSRVI  | WQDEEVKKY | 61  | 1.32   | 3.75   | 72  | 1  |
|  |                      | VKKYTGSR  | 66  | 4.61   | 100.0  | 9   | 3  |
|  | GGMINKHVGIQAQANWVRGQ | IQAQANWVR | 249 | -1.43  | 0.02   | 66  | 1  |
|  |                      | INKHVGIQA | 243 | 113.39 | 113.39 | 11  | 4  |
|  | FGDLKVGGTFSFTYYGQLM  | VGGTFSFTY | 343 | -0.47  | 0.5    | 84  | 4  |
|  |                      | FSFTYYGQL | 347 | 1.78   | 5.91   | 216 | 2  |
|  | NSPSNISNYWLDGVYDINEN | YWLDGVYDI | 272 | 106.1  | 106.1  | 130 | 13 |
|  | PLTDLNGDVLKGTSYNKHFP | VLKGTSYNK | 692 | -0.22  | 0.03   | 56  | 1  |
|  | PPDKTGDPSTFIKSLGNLLY | FIKSLGNNL | 223 | 0.74   | 2.1    | 150 | 6  |
|  |                      | IKSLGNLL  | 224 | 6.21   | 500.0  | 60  | 15 |
|  | WNIQVSQIFWENGRHRVTGS | WNIQVSQIF | 785 | 0.69   | 2.0    | 128 | 20 |
|  |                      | IFWENGRHR | 792 | 1.1    | 3.0    | 16  | 2  |
